# Supplementary material for: Synthesis and Characterization of Stable Iron Pentacarbonyl Radical Cation Salts
Source: PubMed Central journal article supplement — Angew Chem Int Ed Engl. 2022 Jun 7;61(32):e202204080. doi: 10.1002/anie.202204080 (PMC9401057; doi:10.1002/anie.202204080), 2022-06-07
Supplement: ANIE-61-0-s006.pdf [file ANIE-61-0-s006.pdf]

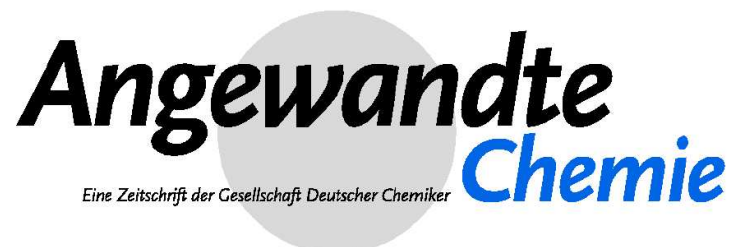

## Supporting Information

### **Synthesis and Characterization of Stable Iron Pentacarbonyl Radical Cation Salts**

*J. M. Rall, M. Schorpp, M. Keilwerth, M. Mayländer, C. Friedmann, M. Daub, S. Richert, K. Meyer, I. Krossing\**

# Electronic Supporting Information

to

## Synthesis and Characterization of a Stable Iron Pentacarbonyl Radical Cation Salt

by

Jan M. Rall, Marcel Schorpp, Martin Keilwerth, Maximilian Mayländer, Christian Friedmann, Michael Daub,  
Sabine Richert, Karsten Meyer, Ingo Krossing\*

### Table of Contents

|                                                                                                                                                   |           |
|---------------------------------------------------------------------------------------------------------------------------------------------------|-----------|
| <b>1 General Synthetic Methods and Characterization Techniques .....</b>                                                                          | <b>2</b>  |
| <b>2 Experimental Procedures .....</b>                                                                                                            | <b>6</b>  |
| 2.1 Synthesis and Oxidation of Phenazine <sup>F</sup> .....                                                                                       | 6         |
| 2.2 Deelectronation of Fe(CO) <sub>5</sub> .....                                                                                                  | 10        |
| <b>3 EPR Spectra of [Fe(CO)<sub>5</sub>]<sup>•+</sup>[Al(OR<sup>F</sup>)<sub>4</sub>]<sup>-</sup> (1) as Solid and in Solution .....</b>          | <b>21</b> |
| <b>4 Magnetic Measurement of [Fe(CO)<sub>5</sub>]<sup>•+</sup>[Al(OR<sup>F</sup>)<sub>4</sub>]<sup>-</sup> (1) in Solution and as Solid .....</b> | <b>22</b> |
| <b>5 <sup>57</sup>Fe Mössbauer Measurements of Fe(CO)<sub>5</sub> and Na<sub>2</sub>[Fe(CO)<sub>4</sub>].....</b>                                 | <b>25</b> |
| <b>6 Crystallographic Data .....</b>                                                                                                              | <b>26</b> |
| <b>7 Quantum Chemical Calculations .....</b>                                                                                                      | <b>62</b> |
| <b>References.....</b>                                                                                                                            | <b>70</b> |

# 1 General Synthetic Methods and Characterization Techniques

## General Synthetic Methods

Unless stated otherwise, all manipulations were performed under an inert argon atmosphere, using standard Schlenk line and glovebox techniques. All glassware was dried overnight in an oven set to 180 °C and flame-dried under vacuum prior to use. CH<sub>2</sub>Cl<sub>2</sub> and *n*-pentane were collected using a solvent purification system and stored over activated 3.0 Å molecular sieves.<sup>[1]</sup> 1,2-difluorobenzene (*o*DFB) (Fluorochem) and 1,2,3,4-tetrafluorobenzene (4FB) (Fluorochem) were refluxed over CaH<sub>2</sub> and distilled and stored over activated 3.0 Å molecular sieves. Traces of less fluorinated benzenes were removed by stirring 4FB over Ag[Al(OR<sup>F</sup>)<sub>4</sub>] for 24 h at room temperature. Due to this procedure, 4FB gets contaminated by traces of HOC(CF<sub>3</sub>)<sub>3</sub> (<1%). NO[Al(OR<sup>F</sup>)<sub>4</sub>]<sup>[2]</sup> {R<sup>F</sup> = C(CF<sub>3</sub>)<sub>3</sub>}, Ag[Al(OR<sup>F</sup>)<sub>4</sub>]<sup>[3]</sup>, NO[F-{Al(OR<sup>F</sup>)<sub>3</sub>]<sub>2</sub>]<sup>[4]</sup> and LiN(C<sub>6</sub>F<sub>5</sub>)<sub>2</sub><sup>[5]</sup> were synthesized according to their literature procedures.

## Single Crystal X-ray Diffraction

Single crystal X-ray diffraction data was collected using a D8 Venture Photon III HPAD (Bruker) detector diffractometer. The crystals were selected under perfluoropolyether oil, mounted on 0.1 to 0.3 mm diameter CryoLoops and quench-cooled using an open flow N<sub>2</sub> cooling device (Oxford Cryosystems).<sup>[6]</sup> The data was collected at 100 K using monochromated Mo K $\alpha$  radiation ( $\lambda = 0.71073$  Å). Data processing was done with SHELXs/XL and refined by least squares on weighted  $F_2$  values for all reflections. Disorder of fragments was done with the help of the implemented DSR tool.<sup>[7,8]</sup> Graphical representations have been prepared using Mercury 3.7 (crystal packing) and Olex2-1.3.

## Powder Diffraction

Powder diffractograms were recorded with the sample sealed by perfluoropolyalkylether oil (AB128330, abcr GMBH & Co. KG) in a 0.3 mm thick capillary (Hilgenberg GmbH, wall thickness 0.01 mm) at 100 K in the  $2\theta$  range 2.0-40.0° with a STOE STADI P powder diffractometer using Mo K $\alpha$  radiation ( $\lambda = 0.709300$  Å), equipped with a Ge(111) monochromator and Mythen 1K detector. Data acquisition, processing and the calculation of powder diffractograms from single crystal data were performed using the STOE WinXPOW package. To ensure the crystalline phase purity of the sample, a Rietveld refinement was performed using the GSAS-II<sup>[9]</sup> software. The structural model

on which the refinement is based was taken from the single crystal study and was not further refined. Successively, background, profile and cell parameters were refined. The graphical representation was done using OriginPro (2020).

### **IR Spectroscopy**

ATR FT-IR spectra of solid samples were recorded at ambient temperature on a ZnSe crystal on a FT-IR Bruker ALPHA with a QuickSnap Platinum ATR sampling module inside an inert atmosphere glovebox. The spectra were recorded in a range from 4000-400  $\text{cm}^{-1}$ , with 64 scans and a resolution of 2  $\text{cm}^{-1}$ . ATR FT-IR spectra of solutions were recorded in a range from 4000-400  $\text{cm}^{-1}$ , with 16 scans and a resolution of 2  $\text{cm}^{-1}$ . Data processing was carried out with the software package OPUS 7.5. All signal intensities were normalized and the relative band intensities described as followed:  $\geq 0.8$  = very strong (vs),  $\geq 0.6$  = strong (s),  $\geq 0.5$  medium (m),  $\geq 0.3$  = medium weak (mw),  $\geq 0.2$  = weak (w),  $\geq 0.1$  = very weak (vw). The graphical representation was done using OriginPro (2020).

### **EPR**

The continuous wave (cw) EPR spectrum of solid  $[\text{Fe}(\text{CO})_5]^{*+}$  was recorded at the X-band (9.75 GHz) on a Bruker EMXnano benchtop EPR spectrometer at 100 K. The modulation frequency was set to 100 kHz and the modulation amplitude to 0.2 mT at a microwave power of 4 mW (14 dB). For a better resolution of the **g**-tensor an additional cw EPR spectrum was measured at the Q-band (34 GHz) on a Bruker ELEXSYS E580 spectrometer with an EN5107D2 resonator at 100 K. The modulation frequency was set to 50 kHz and the modulation amplitude to 0.2 mT at a microwave power of 0.1 mW (20 dB). After data acquisition, the spectra were baseline-corrected, frequency-corrected to 9.75 GHz/34 GHz and field-corrected using a carbon fiber standard with  $g = 2.002644$ .<sup>[10]</sup> The global numerical simulation of the experimental spectra was done using EasySpin functions in MATLAB.<sup>[11]</sup>

Additional EPR spectra in solution were recorded on a JOEL continuous wave spectrometer JES-FA200, equipped with an X-band Gunn diode oscillator bridge, a cylindrical mode cavity, and a helium cryostat. The samples were measured under nitrogen atmosphere in quartz glass EPR tubes at 95 K. The EPR spectra were recorded at the X-band (8.95 GHz). The modulation amplitude was set to 0.7 mT at a microwave power of 1.0 mW.

## **NMR**

NMR samples were prepared under inert atmosphere in NMR tubes equipped with a gas-tight J. Young valve.  $^1\text{H}$ -,  $^{13}\text{C}$ -,  $^{19}\text{F}$ -,  $^{27}\text{Al}$ -NMR spectra were acquired either on a Bruker Biospin Avance II+ 400 MHz WB, a Bruker Avance 200 MHz or a Bruker Avance III HD 300 MHz spectrometer. NMR spectra were reported relative to TMS and calibrated to residual solvent resonances.<sup>[12]</sup> The data analysis and graphical representation was performed using the Bruker TOPSPIN 3.2 software.

## **Cyclovoltammetry**

For the collection of cyclovoltammetry (CV) measurements a three-electrode setup was used, consisting of a Pt disk working electrode, a Pt net as counter electrode and a Pt wire in a separated Fc/Fc<sup>+</sup>-solution, to a concentration of 10 mM of each compound, as reference electrode. Blank measurements were collected with a 100 mM solution of conducting salt  $[\text{NBu}_4][\text{Al}(\text{OR}^{\text{F}})_4]$  in 4FB. After that, the analyte was added to a concentration of 10 mM. For both measurements different scan rates of 20, 50 and 100  $\text{mVs}^{-1}$  were used. The graphical representation was done using OriginPro (2020).

## **Mössbauer**

Zero-field  $^{57}\text{Fe}$ -Mössbauer spectra were recorded on a WissEl Mössbauer spectrometer (MRG-500) at a temperature of 77 K in constant acceleration mode.  $^{57}\text{Co}/\text{Rh}$  was used as the  $\gamma$ -radiation source. WinNormos for Igor Pro software was used for the quantitative evaluation of the spectral parameters (least squares fitting to Lorentzian peaks). The minimum experimental line widths were 0.21  $\text{mms}^{-1}$  (full width at half maximum, FWHM). The temperature of the sample was controlled by a MBBC-HE0106 MOESSBAUER He/N<sub>2</sub> cryostat within an accuracy of +/- 0.3 K. Least-square fitting of the Lorentzian signals was carried out with the "Mfit" software, developed by Dr. Eckhard Bill (MPI CEC, Mülheim/Ruhr). The isomer shifts were reported relative to  $\alpha$ -iron reference at 300 K.

## **SQUID**

Magnetism data of microcrystalline and powdered samples (10.0-25.0 mg), loaded within polycarbonate gel capsules, were collected on a Quantum Design MPMS-3 SQUID magnetometer. The DC susceptibility was recorded in the temperature range of 2-300 K with an applied DC field of 1 T,

unless stated otherwise. Values of the magnetic susceptibility were corrected for the core diamagnetism of the sample using tabulated Pascal's constants.<sup>[13]</sup> For simulation and analysis of the data, the program "JUIX2" written by Dr. Eckhard Bill (MPI CEC, Mülheim/Ruhr) was used.

### Evans NMR Method

NMR samples were prepared under inert atmosphere in NMR tubes equipped with a gas-tight J. Young valve. **1** was weighted into an NMR tube (4.2 mg, 8.5 mg, 16.1 mg and 31.7 mg) and a stock solution of TMS in 4FB (0.03 M) was added (706.3 mg, 719.8 mg, 711.3 mg, 701.2 mg). A sealed capillary of the stock solution was added to the NMR tube. The <sup>1</sup>H-NMR spectra were acquired on a Bruker Avance II Widebore 400 MHz spectrometer. Data analysis was performed using the Bruker TOPSPIN 3.2 software. Further data analysis and graphical representation was done using OriginPro (2020).

### Computational Details

The quantum chemical calculations were carried out with the TURBOMOLE software<sup>[14,15]</sup> using BP86<sup>[16,17]</sup> or B3LYP<sup>[18–20]</sup> functionals with def2-TZVPP<sup>[21]</sup> basis sets, in combination with the D3BJ<sup>[22,23]</sup> dispersion correction. A fine integration grid (m4) and the default SCF convergence criteria ( $10^{-7}$  a.u) were used. All frequency calculations (if applicable via the module AOFORCE<sup>[24]</sup>, otherwise via the module NUMFORCE) were simulated without scaling factor and a FWHM of  $10\text{ cm}^{-1}$ . All calculated structures were checked for consistency in terms of geometric conversion, sensible electron occupations and the absence of imaginary vibrational frequencies.

Single point calculations were done at the B3LYP/EPR-II(CP(PPP for Fe)<sup>[25–27]</sup> level of theory of the cation  $[\text{Fe}(\text{CO})_5]^{++}$  based on a cutout from the obtained scXRD structure of  $[\text{Fe}(\text{CO})_5]^{++}[\text{Al}(\text{OR}^{\text{F}})_4]^-$  (**1**) using ORCA<sup>[28,29]</sup> to obtain the g-tensor.

## 2 Experimental Procedures

### 2.1 Synthesis and Oxidation of Phenazine<sup>F</sup>

#### Synthesis of Phenazine<sup>F</sup>

A 250 mL Schlenk tube was charged with  $\text{LiN}(\text{C}_6\text{F}_5)_2$  (7.1 g, 19.9 mmol) and under slow stirring and dynamic vacuum heated to 180 °C. The temperature was increased to 200 °C and the tap to the vacuum manifold was closed. After 10-60 min, the reaction proceeded instantaneous forming a white and black precipitate in the entire Schlenk tube. The residue was taken up in a mixture of  $\text{Et}_2\text{O}$  (100 mL) and THF (50 mL). The organic layer was washed with HCl (10%, 30 mL) and the aqueous layer was extracted with  $\text{Et}_2\text{O}$  (3 x 30 mL). The combined organic layers were washed with  $\text{H}_2\text{O}$  (30 mL) and brine (30 mL), then dried over  $\text{MgSO}_4$ . The solvent was removed under reduced pressure yielding a sticky dark brown residue. The residue was suspended in MeCN (2 pipettes) and washed with  $\text{Et}_2\text{O}$  (2 pipettes) yielding off-white phenazine<sup>F</sup> (0.7 g, 9.99 mmol, 11%).

$^{19}\text{F}$ -NMR: (282.45 MHz,  $\text{CDCl}_3$ , 298 K)  $\delta = -141.5$  (m, 4F),  $-150.4$  (m, 4F),  $-154.3$  (m, 2F),  $-160.3$  (m, 4F),  $-161.2$  (m, 4F) ppm.

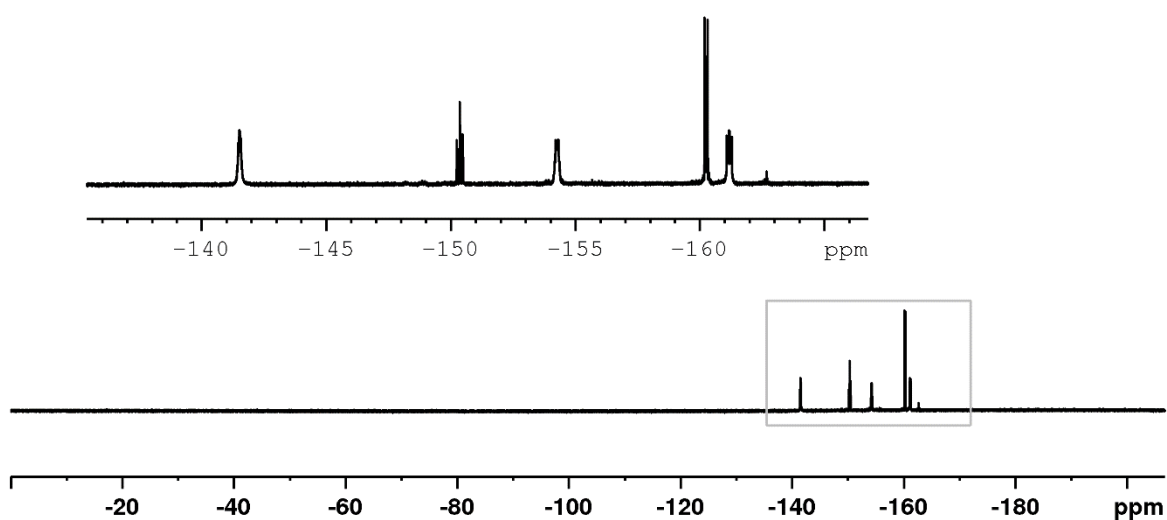

Figure S1:  $^{19}\text{F}$ -NMR (188.31 MHz,  $\text{CDCl}_3$ , 298 K) spectrum of phenazine<sup>F</sup>.

### **Synthesis of [Phenazine<sup>F</sup>][Al(OR<sup>F</sup>)<sub>4</sub>] using Ag[Al(OR<sup>F</sup>)<sub>4</sub>]**

Phenazine<sup>F</sup> (900 mg, 1.37 mmol) and Ag[Al(OR<sup>F</sup>)<sub>4</sub>] (1.47 g, 1.37 mmol, 1.00 eq.) were weighted into an H-cell equipped with a G4 frit. A mixture of SO<sub>2</sub>/Br<sub>2</sub> was condensed onto the solids at -78 °C (ensuring an excess of Br<sub>2</sub>). The purple reaction mixture was stirred at ambient temperature for 18 h. The SO<sub>2</sub>/Br<sub>2</sub> mixture was condensed into the empty arm of the H-cell to allow for complete precipitation of AgBr and poured back onto the crude mixture. The suspension was filtered by the internal frit and extracted three times by back condensing the SO<sub>2</sub>/Br<sub>2</sub> mixture. The SO<sub>2</sub>/Br<sub>2</sub> mixture was removed and the product dried under reduced pressure yielding dark purple [Phenazine<sup>F</sup>][Al(OR<sup>F</sup>)<sub>4</sub>] (2.07 g, 1.27 mmol, 93%).

### **Synthesis of [Phenazine<sup>F</sup>][Al(OR<sup>F</sup>)<sub>4</sub>] using NO[Al(OR<sup>F</sup>)<sub>4</sub>]**

Phenazine<sup>F</sup> (500 mg, 0.76 mmol) and NO[Al(OR<sup>F</sup>)<sub>4</sub>] (758 mg, 0.76 mmol, 1.00 eq.) were weighted into a Schlenk tube. CH<sub>2</sub>Cl<sub>2</sub> (20 mL) was added to the solids. The reaction mixture was stirred at ambient temperature for 18 h. Neutral NO gas was removed through three cycles by the freeze pump thaw method. The solvent was removed under reduced pressure yielding dark purple [Phenazine<sup>F</sup>][Al(OR<sup>F</sup>)<sub>4</sub>] (1150 mg, 0.71 mmol, 93%).

<sup>19</sup>F-NMR: (188.31 MHz, 4FB, 298 K) δ = -76.5 (s, 36F, [Al{OC(CF<sub>3</sub>)<sub>3</sub>}<sub>4</sub>]<sup>-</sup>) ppm.

<sup>27</sup>Al-NMR: (78.22 MHz, 4FB, 298 K): δ = 34.4 (s, 1Al, [Al(OR<sup>F</sup>)<sub>4</sub>]<sup>-</sup>) ppm.



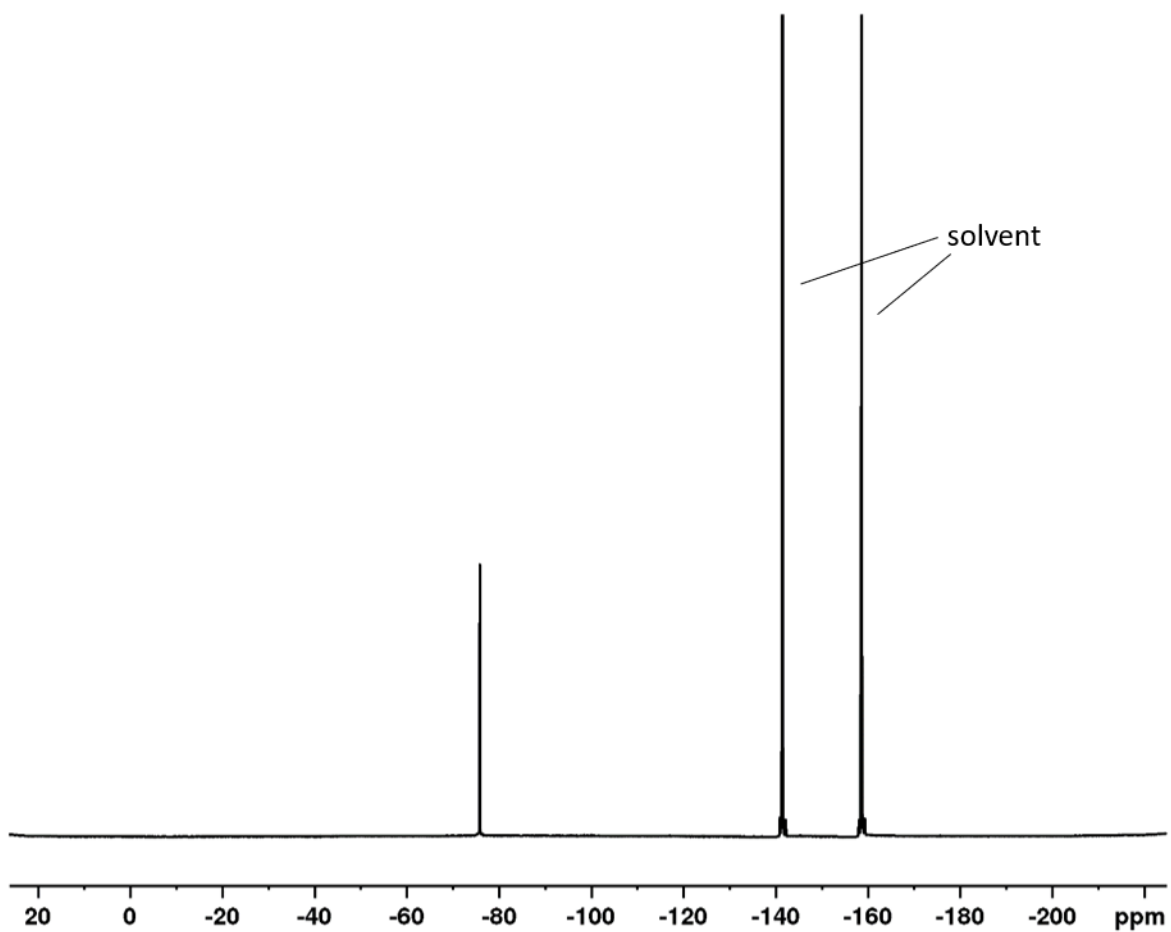

Figure S2:  $^{19}\text{F}$ -NMR (188.31 MHz, 4FB, 298 K) spectrum of  $[\text{phenazine}^{\text{F}}][\text{Al}(\text{OR}^{\text{F}})_4]$  using  $[\text{NO}][\text{Al}(\text{OR}^{\text{F}})_4]$ .

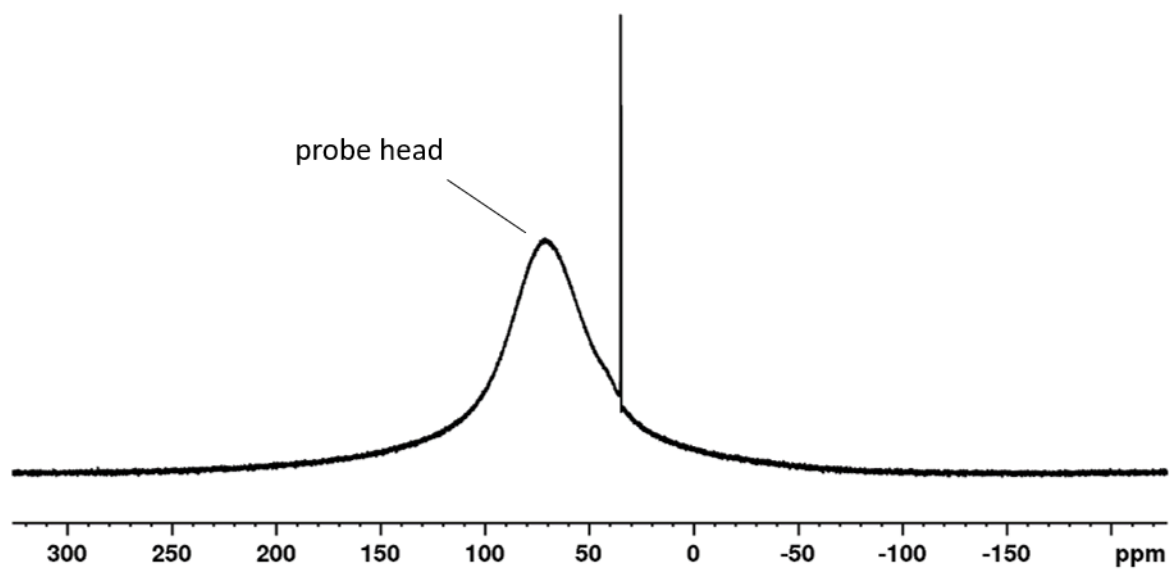

Figure S3:  $^{27}\text{Al}$ -NMR (78.22 MHz, 4FB, 298 K) spectrum of  $[\text{phenazine}^{\text{F}}][\text{Al}(\text{OR}^{\text{F}})_4]$  using  $[\text{NO}][\text{Al}(\text{OR}^{\text{F}})_4]$ .

### Synthesis of [Phenazine<sup>F</sup>][F-{Al(OR<sup>F</sup>)<sub>3</sub>}<sub>2</sub>] using NO[F-{Al(OR<sup>F</sup>)<sub>3</sub>}<sub>2</sub>]

Phenazine<sup>F</sup> (150 mg, 0.23 mmol) and NO[F-{Al(OR<sup>F</sup>)<sub>3</sub>}<sub>2</sub>] (344 mg, 0.23 mmol, 1.00 eq.) were weighted into a Schlenk tube. CH<sub>2</sub>Cl<sub>2</sub> (10 mL) was added to the solids. The reaction mixture was stirred at ambient temperature for 18 h. Neutral NO gas was removed through three cycles by the freeze pump thaw method. The solvent was removed under reduced pressure yielding dark purple [Phenazine<sup>F</sup>][F-{Al(OR<sup>F</sup>)<sub>3</sub>}<sub>2</sub>] (396 mg, 0.18 mmol, 81%). Crystals suitable for scXRD analysis were grown by layering a solution of [Phenazine<sup>F</sup>][F-{Al(OR<sup>F</sup>)<sub>3</sub>}<sub>2</sub>] in *o*DFB with *n*-pentane.

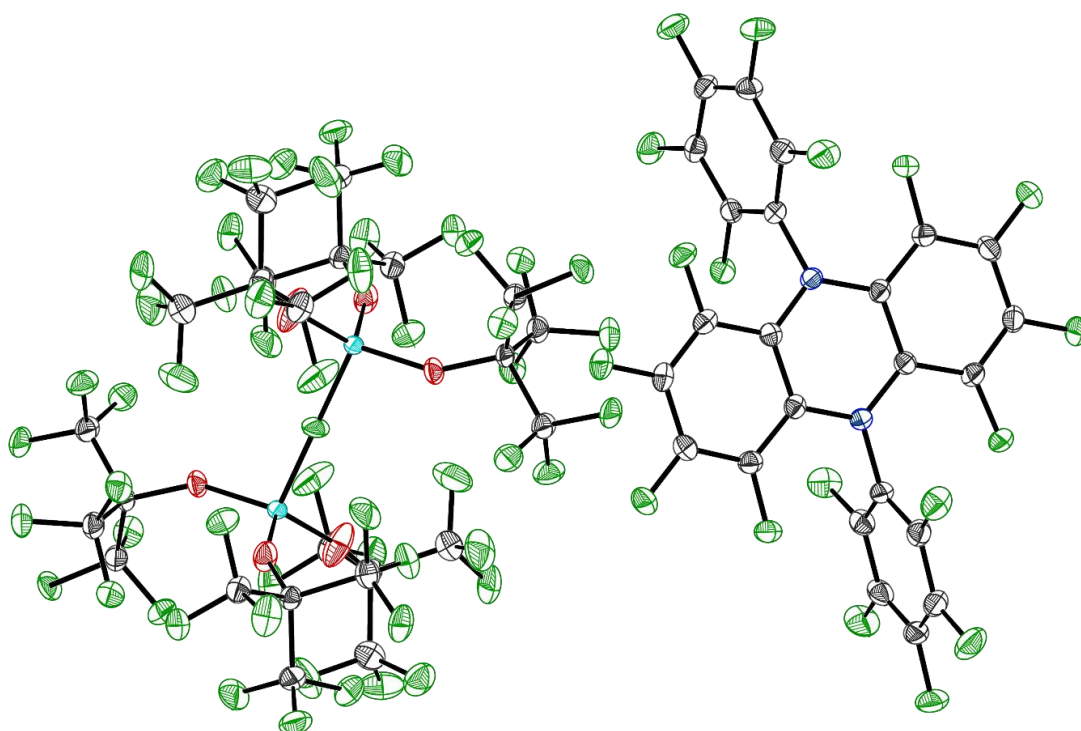

Figure S4: Molecular structure of [Phenazine<sup>F</sup>][F-{Al(OR<sup>F</sup>)<sub>3</sub>}<sub>2</sub>]. Thermal displacement ellipsoids set at 50% probability.

## 2.2 Deelectronation of Fe(CO)<sub>5</sub>

### Synthesis of [Fe(CO)<sub>5</sub>oDFB][Al(OR<sup>F</sup>)<sub>4</sub>] in 1,2-Difluorobenzene using impure [Phenazine<sup>F</sup>][Al(OR<sup>F</sup>)<sub>4</sub>] from Ag<sup>+</sup>/Br<sub>2</sub> Route

[Phenazine<sup>F</sup>][Al(OR<sup>F</sup>)<sub>4</sub>] (150 mg, 0.09 mmol) was weighted into a Schlenk tube. oDFB (2 mL) was added, resulting in a deep purple solution. A stock solution of Fe(CO)<sub>5</sub> in oDFB (2 mL, 0.09 mmol, 1.00 eq.) was added, which resulted in the reaction mixture turning instantaneously dark green. The reaction mixture was stirred at ambient temperature for 1.5 h. Green crystals of [Fe(CO)<sub>5</sub>oDFB][Al(OR<sup>F</sup>)<sub>4</sub>] and red crystals of minor by-product [Fe<sub>2</sub>(CO)<sub>8</sub>Br][F-{Al(OR<sup>F</sup>)<sub>3</sub>}<sub>2</sub>] were obtained by layering the reaction mixture with *n*-pentane (18.1 mg, 0.01 mmol, 15%). These crystals were suitable for scXRD.

ATR-FT-IR (ZnSe): 2128 (vw), 2116 (w), 2110 (w), 2083 (vw), 1506 (vw), 1352 (vw), 1297 (vw), 1263 (vw), 1239 (s), 1209 (vs), 1176 (w), 1153 (w), 968 (vs), 832 (vw), 759 (vw), 726 (s), 576 (vw), 560 (vw) cm<sup>-1</sup>.

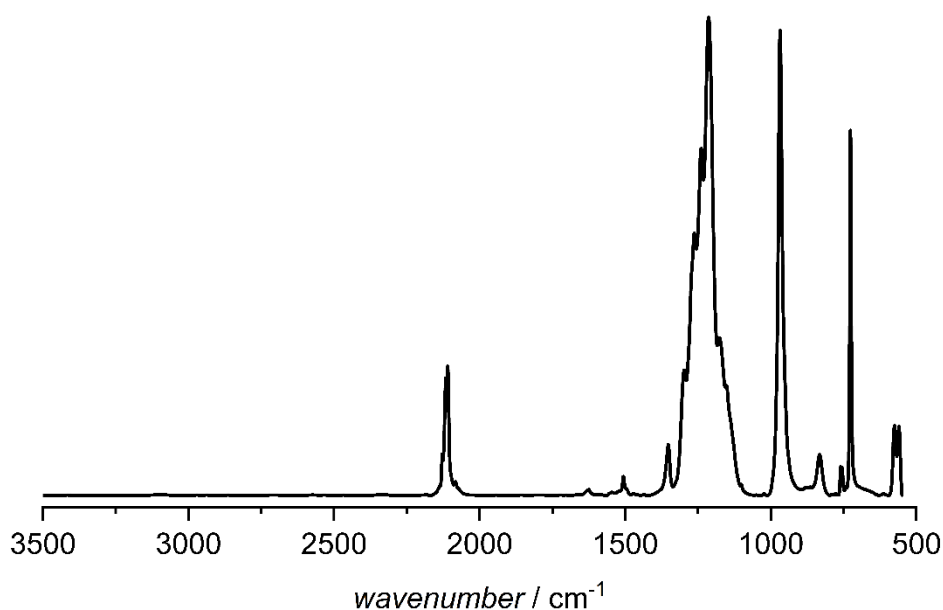

Figure S5: Full experimental ZnSe-ATR-FT-IR spectrum of solid [Fe(CO)<sub>5</sub>oDFB][Al(OR<sup>F</sup>)<sub>4</sub>].

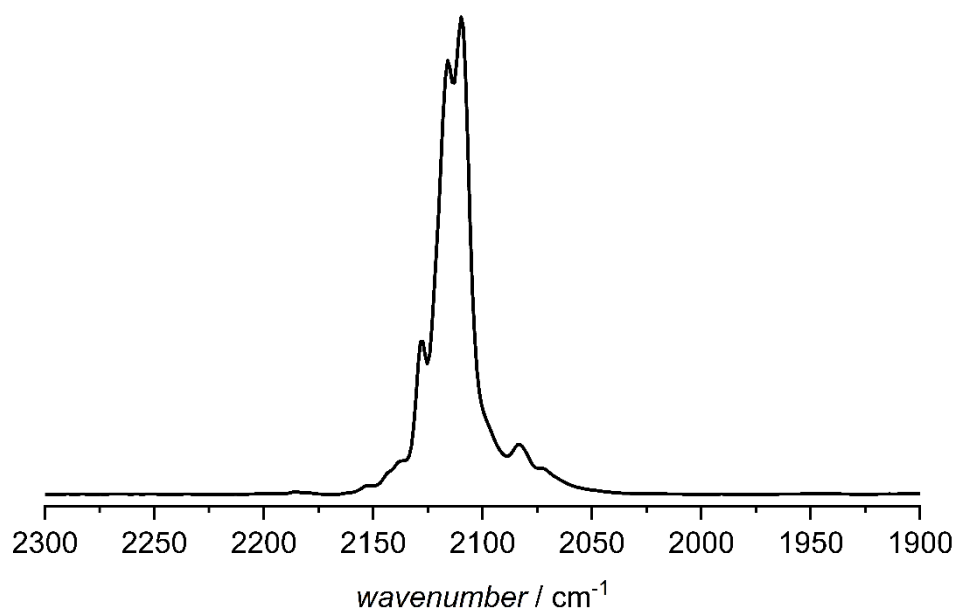

Figure S6: The carbonyl region of experimental ZnSe-ATR-FT-IR spectrum of solid  $[\text{Fe}(\text{CO})_5\text{oDFB}][\text{Al}(\text{OR}^{\text{f}})_4]$ .

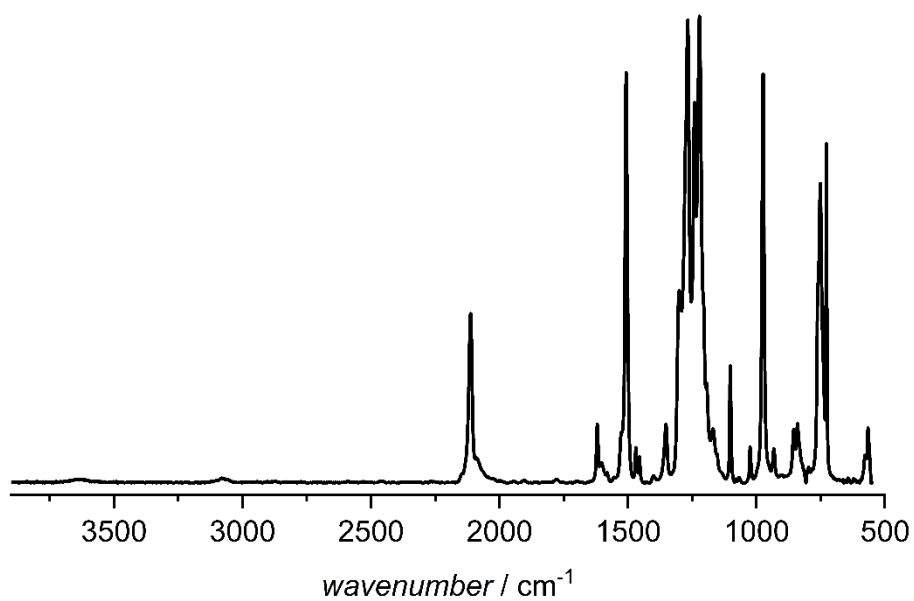

Figure S7: Full experimental ZnSe-ATR-FT-IR spectrum of  $[\text{Fe}(\text{CO})_5\text{oDFB}][\text{Al}(\text{OR}^{\text{f}})_4]$  in oDFB.

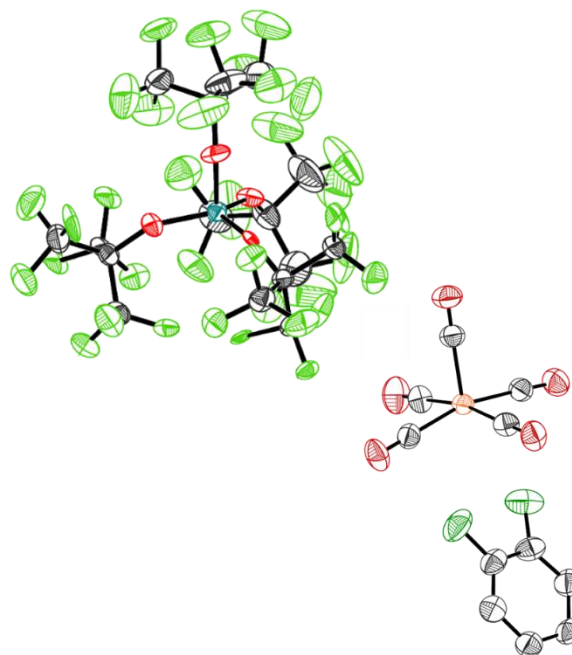

Figure S8: Molecular structure of  $[\text{Fe}(\text{CO})_5\text{oDFB}][\text{Al}(\text{OR}^{\text{F}})_4]$ . Protons omitted for clarity. Thermal displacement ellipsoids were set at 50% probability.

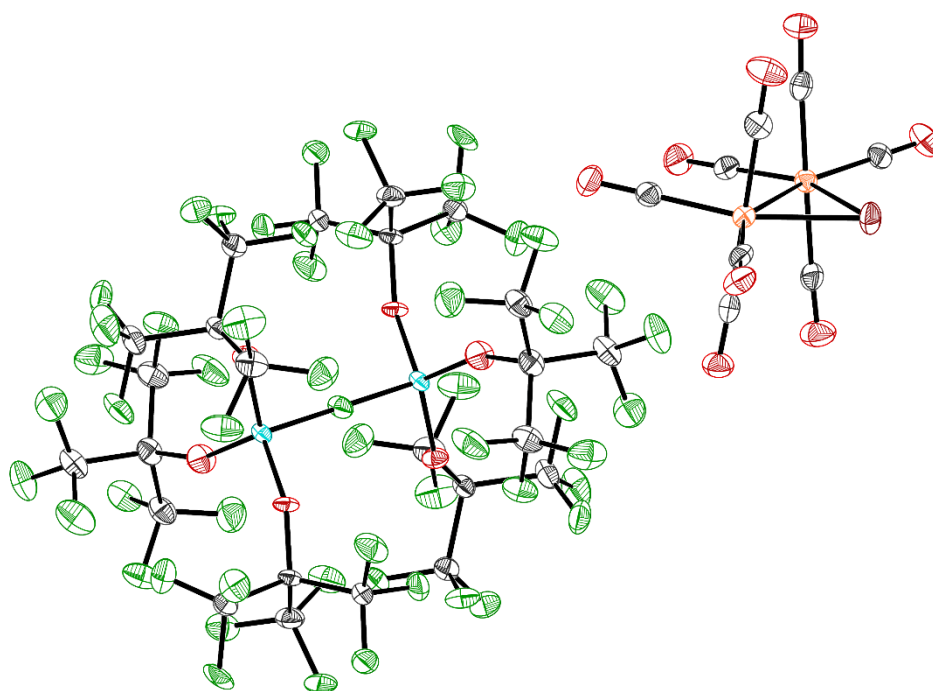

Figure S9: Molecular structure of minor by-product  $[\text{Fe}_2(\text{CO})_8\text{Br}][\text{F}-\{\text{Al}(\text{OR}^{\text{F}})_3\}_2]$ . Thermal displacement ellipsoids were set at 50% probability.

### Synthesis of $[\text{Fe}(\text{CO})_5][\text{Al}(\text{OR}^{\text{F}})_4]$ in 1,2,3,4-Tetrafluorobenzene using pristine [Phenazine<sup>F</sup>] $[\text{Al}(\text{OR}^{\text{F}})_4]$ from NO-Route

[Phenazine<sup>F</sup>] $[\text{Al}(\text{OR}^{\text{F}})_4]$  (400 mg, 0.25 mmol) was weighted into a Schlenk tube. A stock solution of  $\text{Fe}(\text{CO})_5$  in 1,2,3,4-tetrafluorobenzene (2.46 mL, 0.25 mmol, 1.00 eq.) was added, after which the reaction mixture instantaneously turned dark green. The reaction mixture was stirred at ambient temperature for 1.5 h. The solution was layered with *n*-pentane and  $[\text{Fe}(\text{CO})_5][\text{Al}(\text{OR}^{\text{F}})_4]$  (**1**) was obtained as dark green crystals suitable for scXRD (200 mg, 0.17 mmol, 70%).

<sup>13</sup>C-NMR (75.48 MHz, 4FB, 298 K):  $\delta = 120$  (q, <sup>1</sup>J(C,F) = 291 Hz, 12C,  $[\text{Al}\{\text{OC}(\text{CF}_3)_3\}_4]^-$ ) ppm.

<sup>19</sup>F-NMR (282.45 MHz, 4FB, 298 K):  $\delta = -75.3$  (s, 36F,  $[\text{Al}\{\text{OC}(\text{CF}_3)_3\}_4]^-$ ) ppm.

<sup>27</sup>Al-NMR (78.22 MHz, 4FB, 298 K):  $\delta = -34.7$  (s, 1Al,  $[\text{Al}\{\text{OC}(\text{CF}_3)_3\}_4]^-$ ) ppm.

ATR-FT-IR (ZnSe): 2128 (w), 2113 (s), 2082 (vw), 1352 (vw), 1301 (s), 1297 (w), 1265 (m), 1238 (s), 1217 (vs), 1175 (w), 970 (vs), 727 (s), 576 (vw), 574 (vw)  $\text{cm}^{-1}$ .

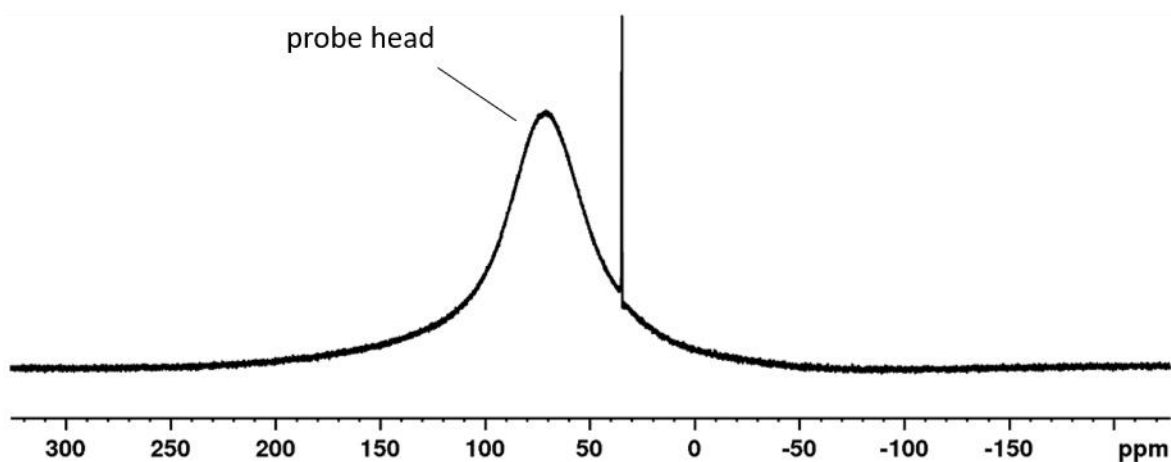

Figure S10: <sup>27</sup>Al-NMR (78.22 MHz, 4FB, 298 K) spectrum of pristine  $[\text{Fe}(\text{CO})_5][\text{Al}(\text{OR}^{\text{F}})_4]$  (**1**). The broad peak centered at about 70 ppm results from the probe head.

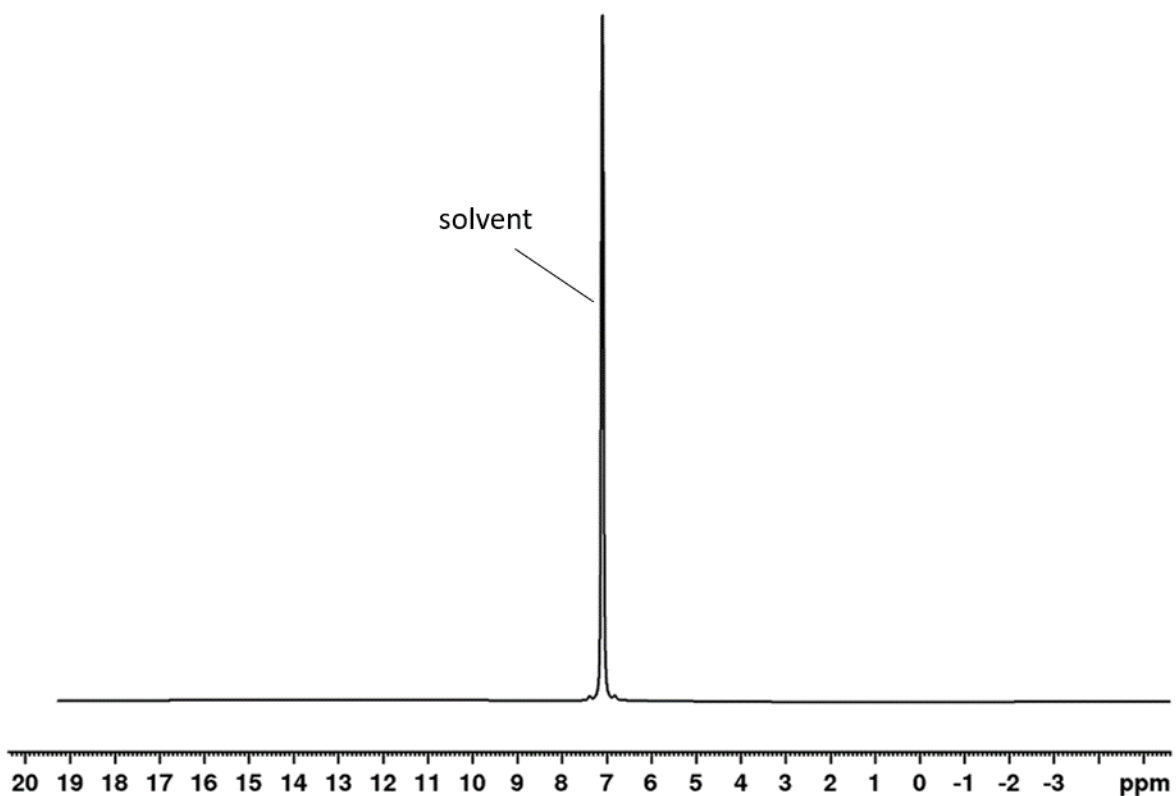

Figure S11:  $^1\text{H}$ -NMR (300.18 MHz, 4FB, 298 K) spectrum of pristine  $[\text{Fe}(\text{CO})_5][\text{Al}(\text{OR}^{\text{F}})_4]$  (**1**). Only solvent signal is evident.

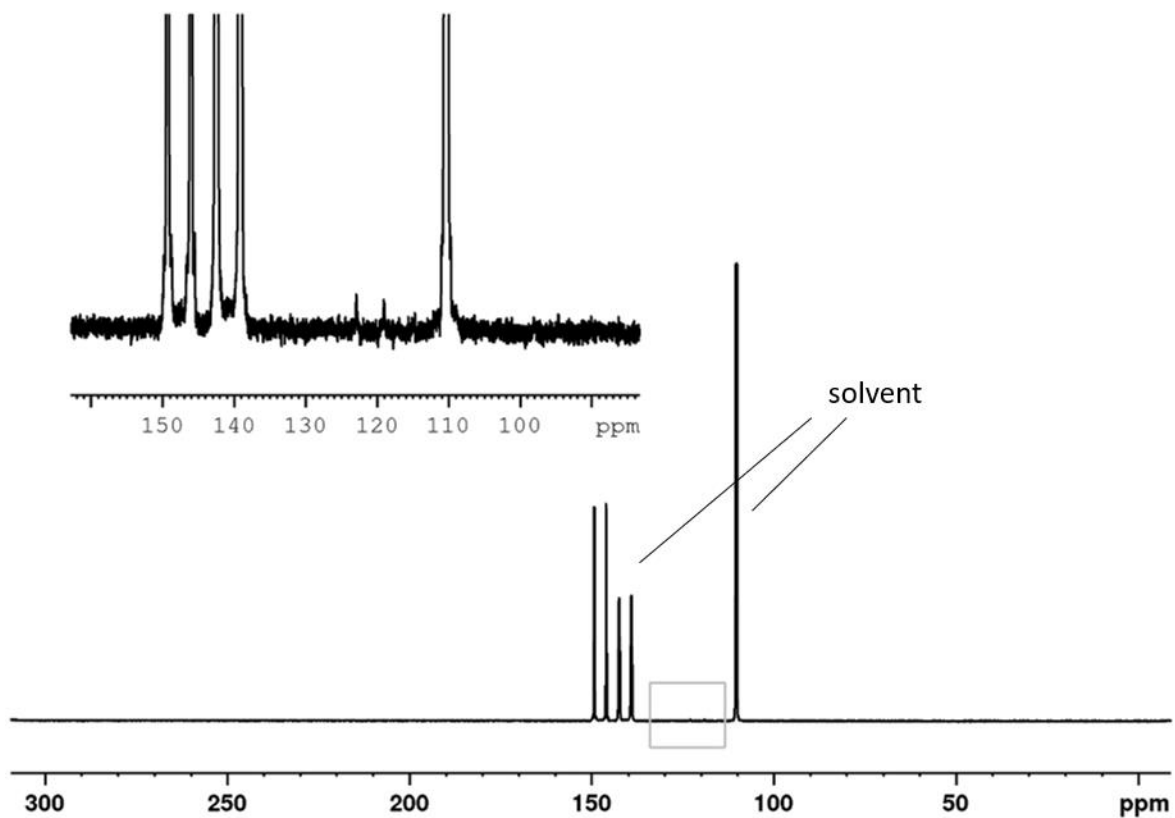

Figure S12:  $^{13}\text{C}\{^1\text{H}\}$ -NMR (75.48 MHz, 4FB, 298 K): spectrum of pristine  $[\text{Fe}(\text{CO})_5][\text{Al}(\text{OR}^{\text{F}})_4]$  (**1**).

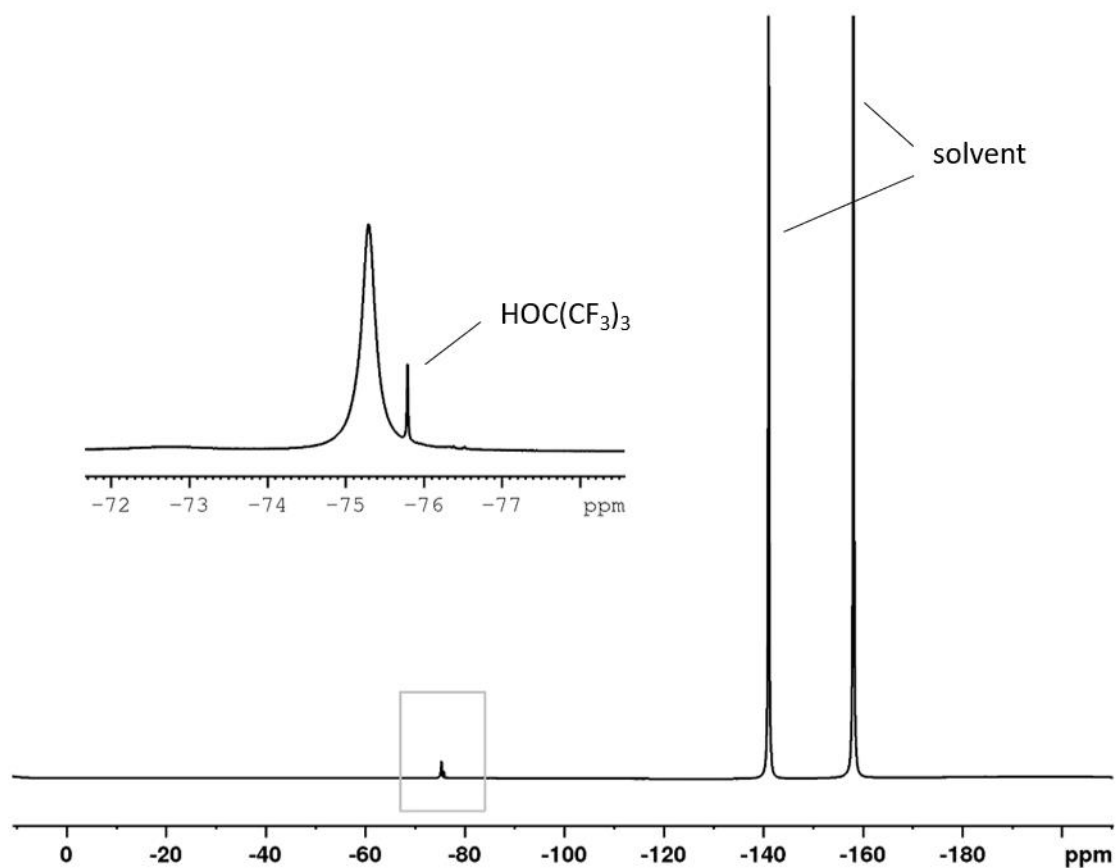

Figure S13:  $^{19}\text{F}$ -NMR (282.45 MHz, 4FB, 298 K) spectrum of pristine  $[\text{Fe}(\text{CO})_5][\text{Al}(\text{OR}^{\text{F}})_4]$  (**1**).

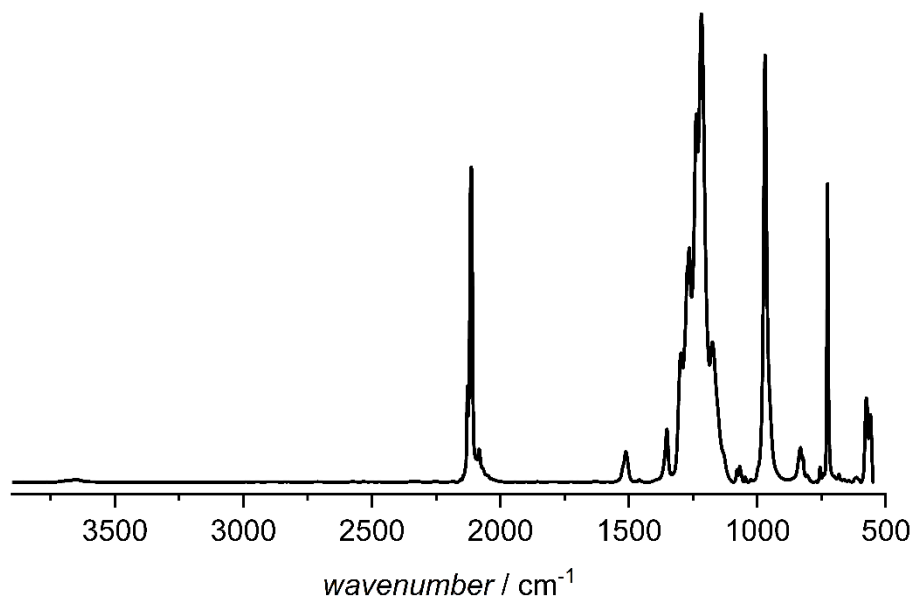

Figure S14: Full experimental ZnSe-ATR-FT-IR spectrum of solid  $[\text{Fe}(\text{CO})_5][\text{Al}(\text{OR}^{\text{F}})_4]$  (**1**).



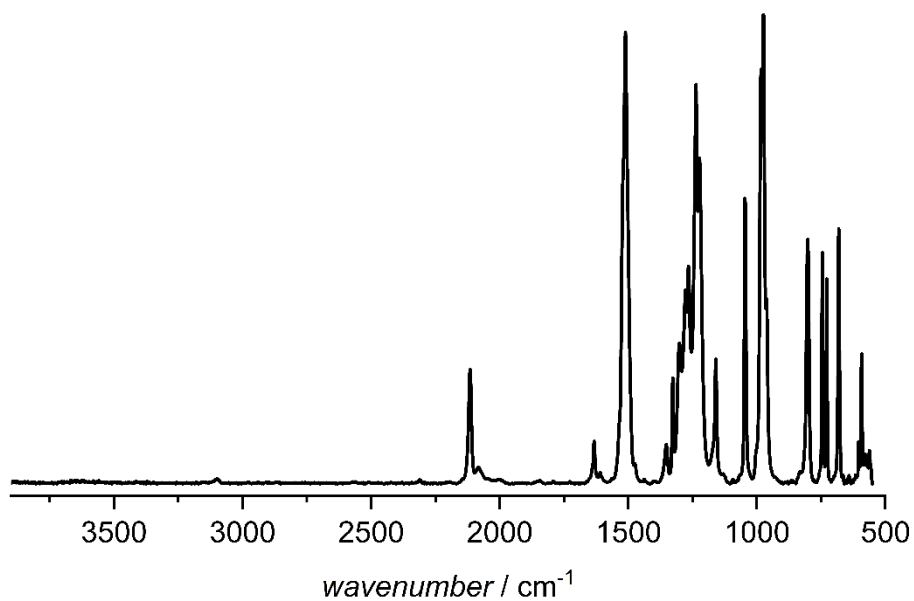

Figure S15: Full experimental ZnSe-ATR-FT-IR spectrum of  $[\text{Fe}(\text{CO})_5][\text{Al}(\text{OR}^{\text{F}})_4]$  (**1**) in 4FB.

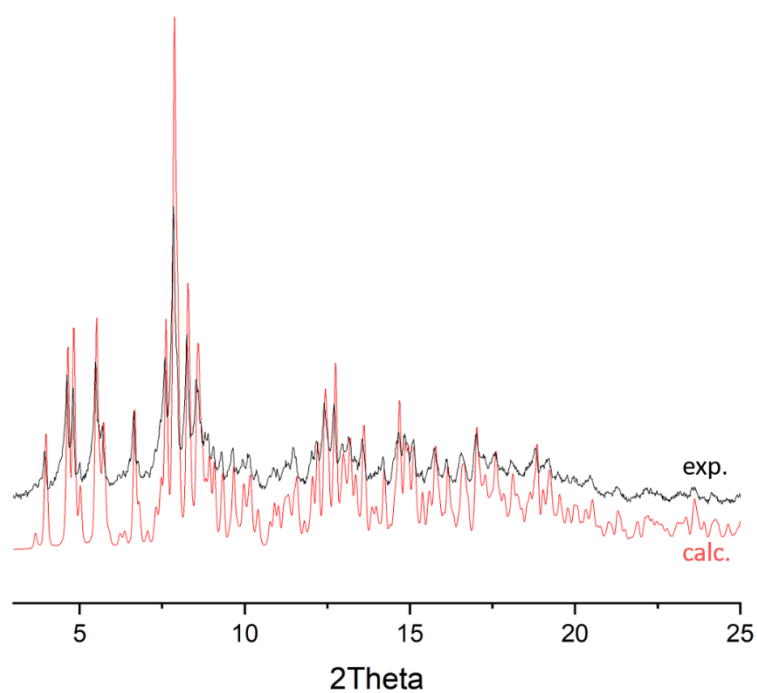

Figure S16: (Black) pXRD analysis of bulk material of  $[\text{Fe}(\text{CO})_5][\text{Al}(\text{OR}^{\text{F}})_4]$  (**1**). (Red) Simulated powder diffraction pattern from obtained crystalline  $[\text{Fe}(\text{CO})_5][\text{Al}(\text{OR}^{\text{F}})_4]$  (**1**). Experimental and simulated pattern are in accordance.

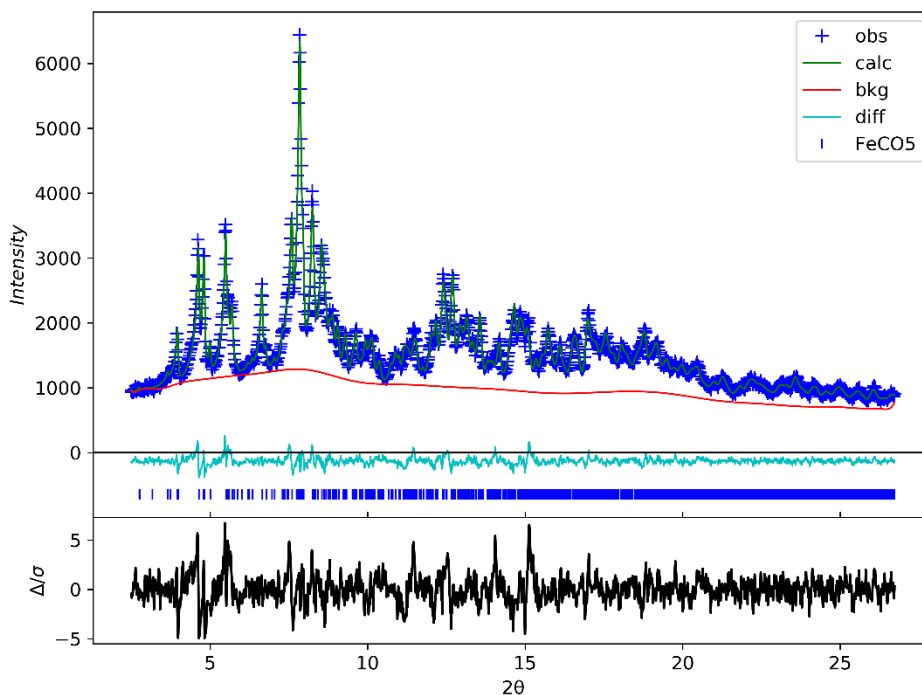

Figure S17: Results of the Rietveld refinement for the pXRD analysis of bulk material of  $[\text{Fe}(\text{CO})_5][\text{Al}(\text{OR}^{\text{F}})_4]$  (**1**). The structural model on which the refinement is based was taken from the single crystal study and was not further refined. A very good agreement with the measured powder diffraction pattern is observed (blue data points and green line). As can be seen from the difference plot (black and turquoise line), no further crystalline phases can be detected. Nevertheless, amorphous impurities cannot be excluded from the result.

Table S1: Crystallographic Data of  $[\text{Fe}(\text{CO})_5][\text{Al}(\text{OR}^{\text{F}})_4]$  (**1**) from the Rietveld refinement.

|                                        |                                                   |
|----------------------------------------|---------------------------------------------------|
| Crystal system                         | Orthorhombic                                      |
| Space-group                            | $P2_12_12_1$                                      |
| Cell parameters / Å                    | $a=14.2348(15)$ , $b=16.8524(18)$ , $c=29.514(3)$ |
| Cell volume / Å <sup>3</sup>           | 7080.2(9)                                         |
| Z                                      | 8                                                 |
| Temperature/K                          | 100                                               |
| $\rho_{\text{calc}}$ g/cm <sup>3</sup> | 2.1820                                            |
| Radiation                              | Mo-K $\alpha_1$ ( $\lambda = 0.70930$ )           |
| $2\theta$ range for data collection    | 2.50 to 26.72                                     |
| Data / Parameter                       | 1616 / 36                                         |
| $R_{\text{F}}/R_{\text{F}}^2$ %        | 1.37 / 3.93                                       |
| wR / %                                 | 3.53                                              |
| GOF                                    | 1.49                                              |

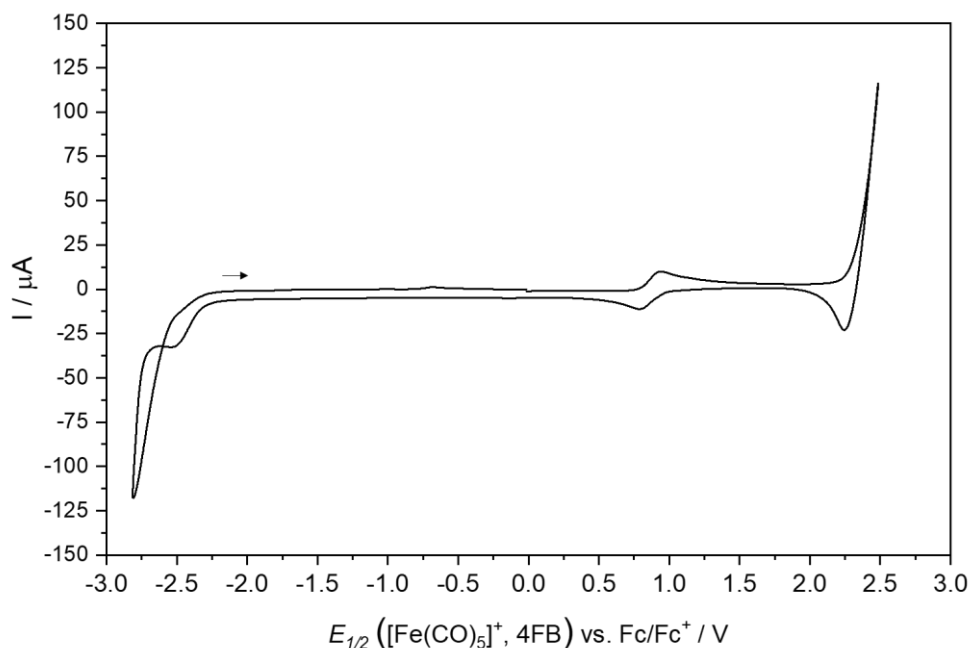

Figure S18: Exemplary full cyclic voltammogram of **1** (10 mM) in 4FB with [NBu<sub>4</sub>][Al(OR<sup>F</sup>)<sub>4</sub>] as conducting salt. The full solvent window is shown using a scan rate of 100 mVs<sup>-1</sup>.

### Synthesis of [Fe(CO)<sub>5</sub>][F-{Al(OR<sup>F</sup>)<sub>3</sub>]<sub>2</sub>] (**2**) in 1,2,3,4-Tetrafluorobenzene

[Phenazine<sup>F</sup>][F-{Al(OR<sup>F</sup>)<sub>3</sub>]<sub>2</sub>] (200 mg, 0.09 mmol) was weighted into a Schlenk tube. A stock solution of Fe(CO)<sub>5</sub> in 1,2,3,4-tetrafluorobenzene (0.93 mL, 0.09 mmol, 1.00 eq.) was added, turning the reaction mixture instantaneously to a dark green solution. The reaction mixture was stirred at ambient temperature for 1.5 h. The solution was layered with *n*-pentane and [Fe(CO)<sub>5</sub>][F-{Al(OR<sup>F</sup>)<sub>3</sub>]<sub>2</sub>] (**2**) was obtained as dark green crystals suitable for scXRD (73 mg, 0.04 mmol, 48%).

<sup>13</sup>C-NMR (50.32 MHz, 4FB, 298 K): only solvent signals

<sup>19</sup>F-NMR (188.31 MHz, 4FB, 298 K): δ = -75.3 (s, 54F, [F-{Al(OR<sup>F</sup>)<sub>3</sub>]<sub>2</sub>]<sup>-</sup>), -184.6 (s, 1F, [F-{Al(OR<sup>F</sup>)<sub>3</sub>]<sub>2</sub>]<sup>-</sup>) ppm.

ATR-FT-IR (ZnSe): 2116 (s), 2084 (vw), 1354 (vw), 1301 (w), 1266 (s), 1245 (vs), 1216 (vs), 1180 (m), 974 (vs), 862(vw), 727 (s), 636 (vw), 574 (w) cm<sup>-1</sup>.

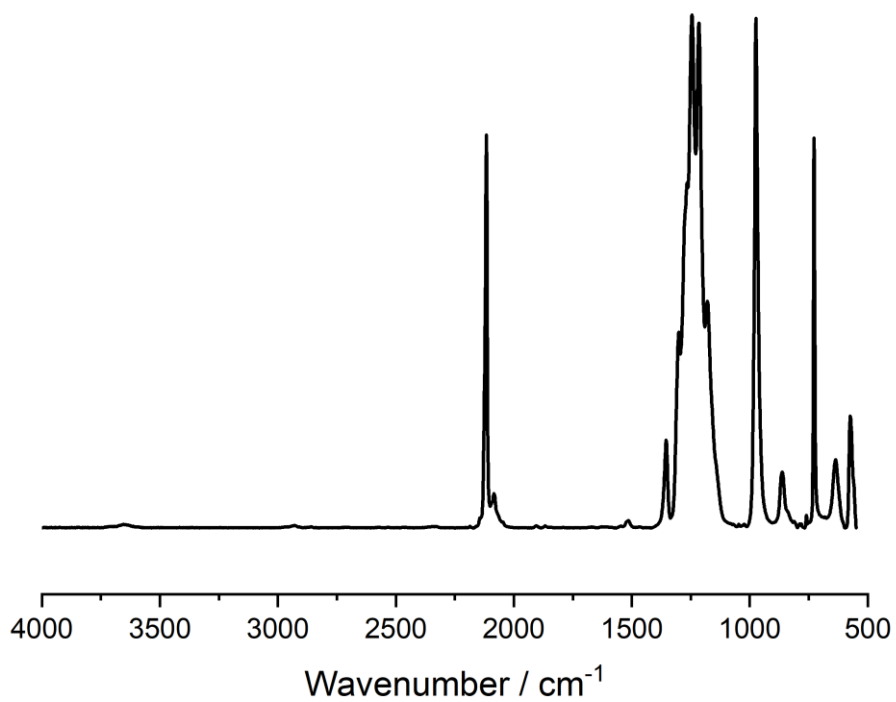

Figure S19: Full experimental ZnSe-ATR-FT-IR spectrum of solid  $[\text{Fe}(\text{CO})_5][\text{F}-\{\text{Al}(\text{OR}^{\text{F}})_3\}_2]$  (**2**).

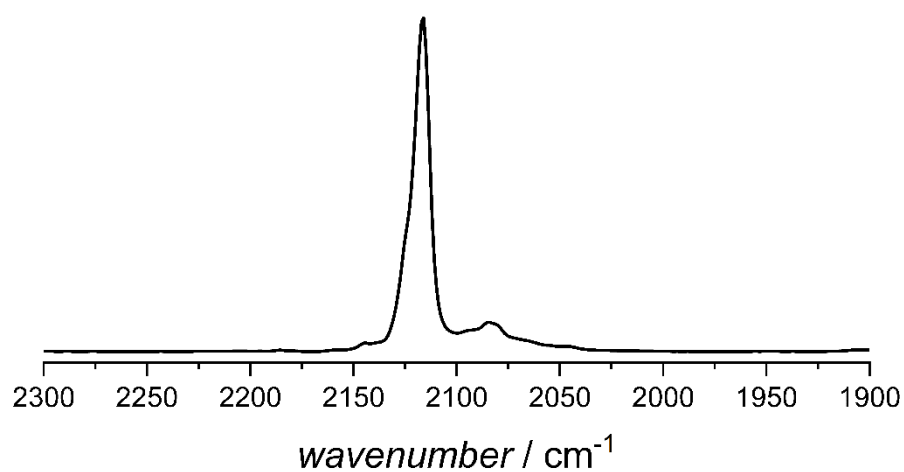

Figure S20: The carbonyl region of experimental ZnSe-ATR-FT-IR spectrum of solid  $[\text{Fe}(\text{CO})_5][\text{F}-\{\text{Al}(\text{OR}^{\text{F}})_3\}_2]$  (**2**).

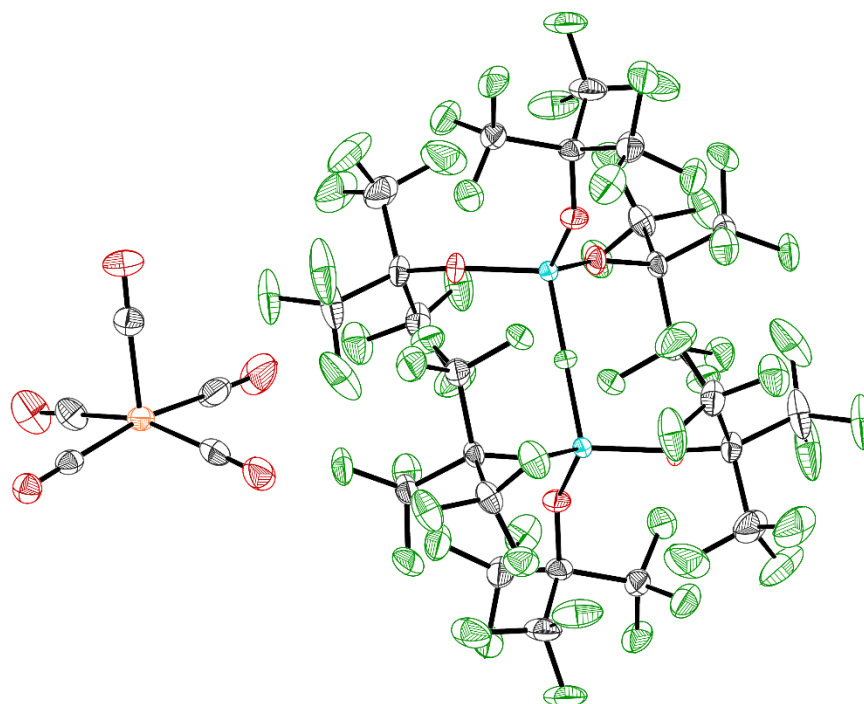

Figure S21: Molecular structure of  $[\text{Fe}(\text{CO})_5][\text{F}-\{\text{Al}(\text{OR}^{\text{F}})_3\}_2]$  (**2**). Thermal displacement ellipsoids were set at 50% probability.

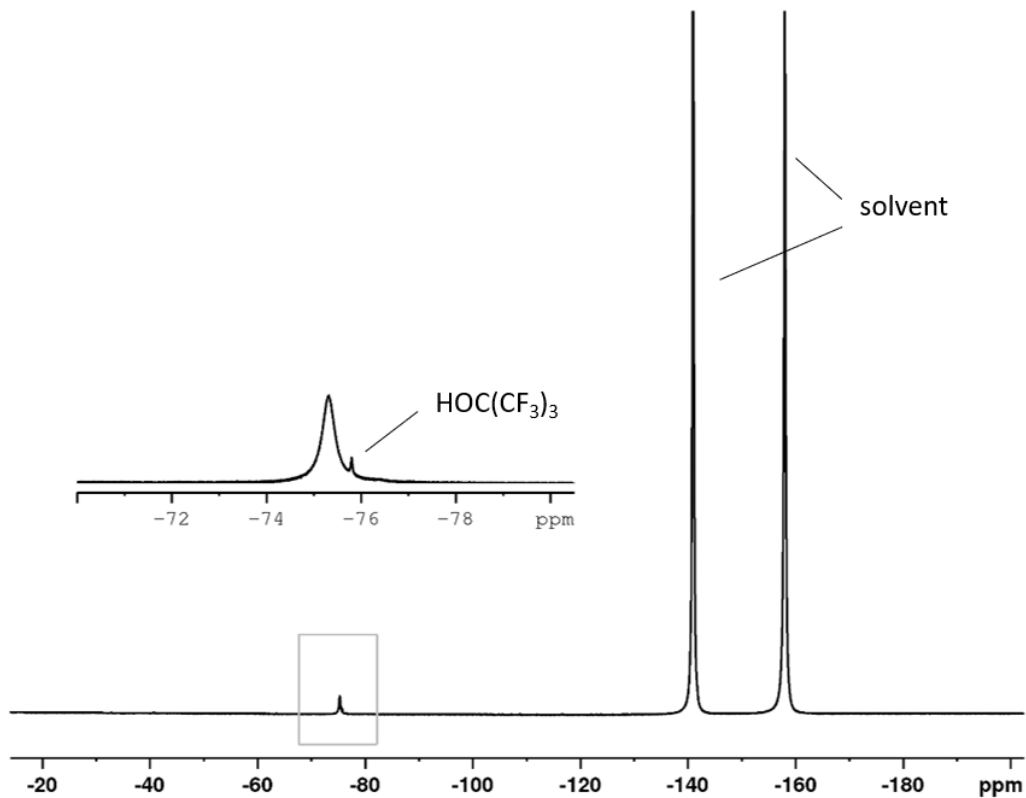

Figure S22:  $^{19}\text{F}$ -NMR (188.31 MHz, 4FB, 298 K) spectrum of  $[\text{Fe}(\text{CO})_5][\text{F}-\{\text{Al}(\text{OR}^{\text{F}})_3\}_2]$  (**2**).

### 3 EPR Spectra of $[\text{Fe}(\text{CO})_5]^{*+}[\text{Al}(\text{OR}^f)_4]^-$ (**1**) as a Solid and in Solution

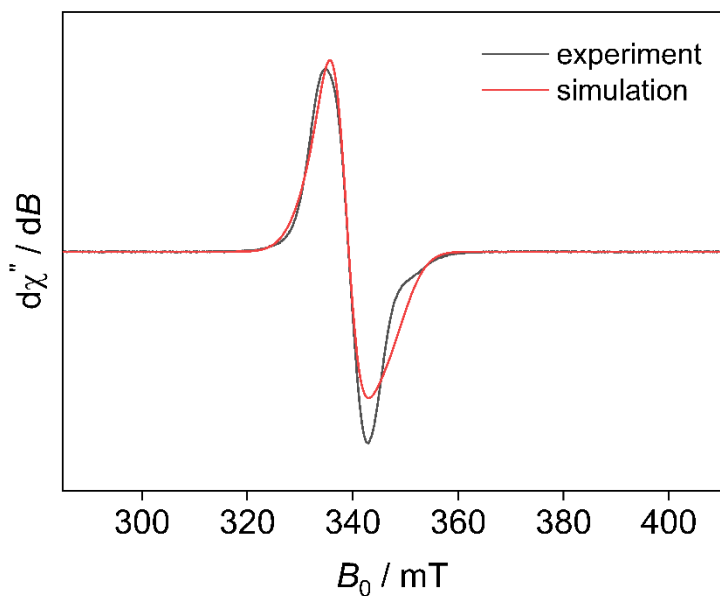

Figure S23: Continuous wave EPR spectrum of solid **1** at the X-band (9.75 GHz) at 100 K.

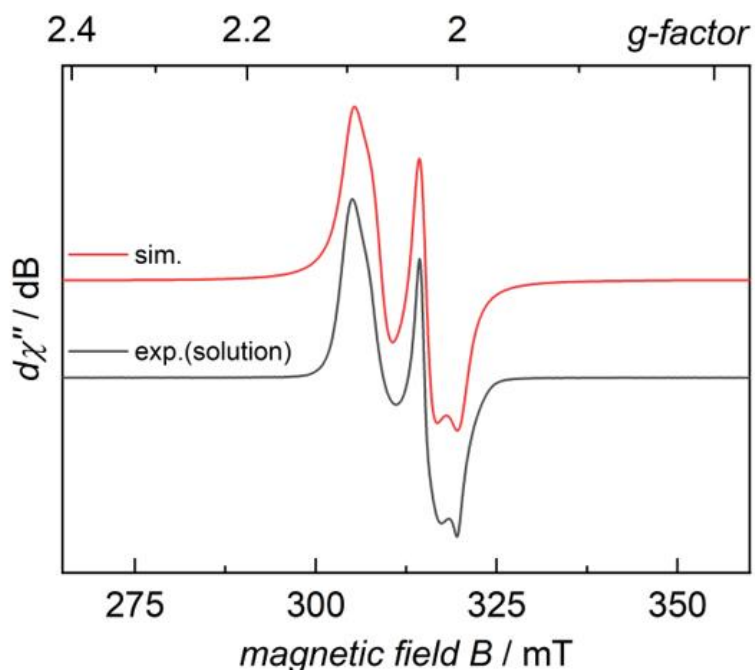

Figure S24: X-band EPR spectrum of **1** in a frozen solution of *o*DFB at 95 K.

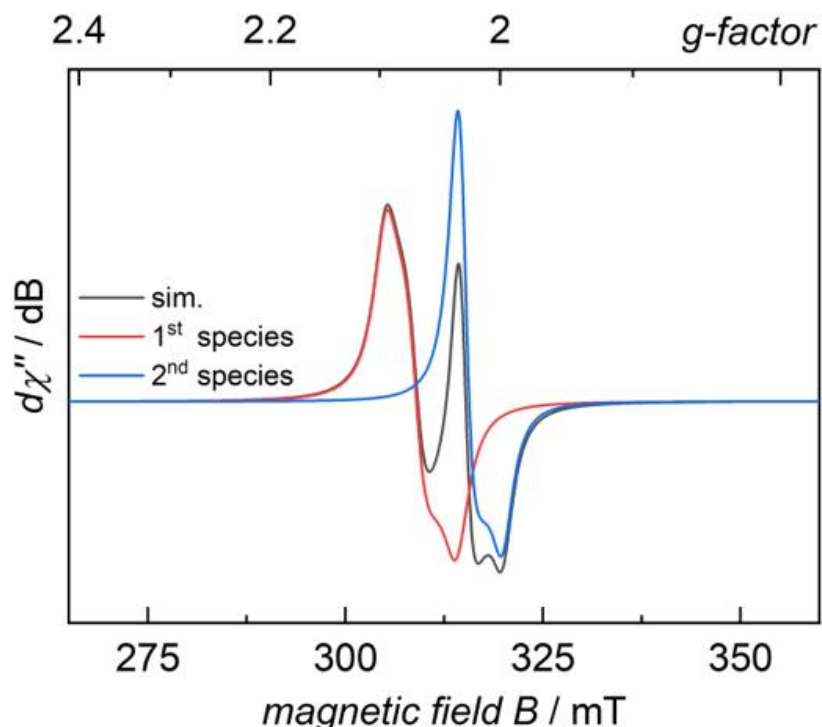

Figure S25: Simulated X-band EPR spectra. The 1<sup>st</sup> species refers to solid **1** (red), 2<sup>nd</sup> species refers to  $[\text{Fe}(\text{CO})_5\text{oDFB}]^{*+}$  (blue). Sim is the combination of the 1<sup>st</sup> and 2<sup>nd</sup> species (gray).

#### 4 Magnetic Measurement of $[\text{Fe}(\text{CO})_5]^{*+}[\text{Al}(\text{OR}^{\text{F}})_4]^{-}$ (**1**) in Solution and as Solid

Evans NMR method was used to determine the effective magnetic moment  $\mu_{\text{eff}}$  in solution.<sup>[30,31]</sup> For this, four solutions with different concentrations of **1** in 4FB were prepared. TMS was added as reference molecule. The mass susceptibilities  $\chi_g$  are given by Eq. (1):<sup>[32,33]</sup>

$$\chi_g = \frac{3\Delta\nu}{4\pi\nu_0 m} + \chi_0 + \frac{\chi_0(\delta_0 - \delta_s)}{m} \quad (1)$$

Where  $\Delta\nu$  is the difference in frequency shift of the probe molecule, in reference to TMS in Hz,  $\nu_0$  is the NMR spectrometer frequency in Hz,  $m$  is the mass of the probe per  $\text{cm}^3$  of solution,  $\chi_0$  is the mass susceptibility of 4FB,  $\delta_0$  is the density of the pure solvent and  $\delta_s$  is the density of 4FB.

For diluted solutions, Eq. (1) can be simplified to Eq. (2):<sup>[32,33]</sup>

$$\chi_g = \frac{3\Delta\nu}{4\pi\nu_0 m} \quad (2)$$

By multiplication of  $\chi_g$  with the molecular mass of the solute  $M$  the molar susceptibilities  $\chi_m$  of a solute can be calculated (Eq. 3):

$$\chi_m = \frac{3\Delta\nu}{4\pi\nu_0 m} M \quad (3)$$

Through linear regression according to Eq. (4) the molar susceptibilities  $\chi_m$  of **1** in 4FB were calculated (Figure S22).

$$\Delta\nu = \frac{4\pi\nu_0\chi_m}{3M} m \quad (4)$$

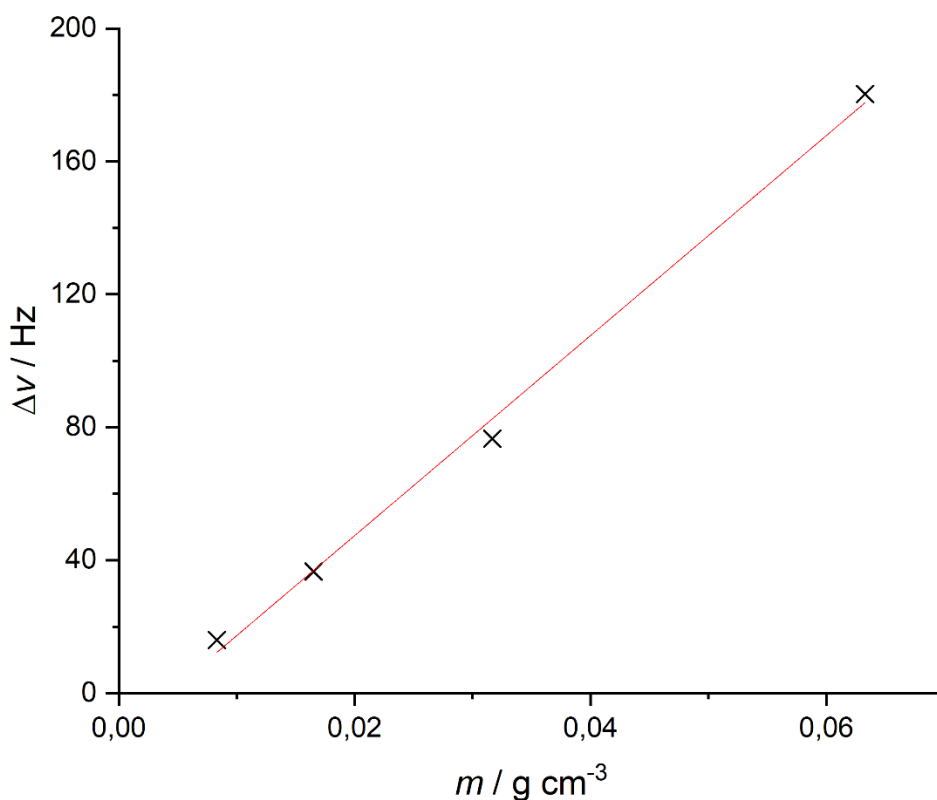

Figure S26: Plot of  $\Delta\nu$  against  $m$  for multiple solutions of **1** in 4FB.

The paramagnetic molar susceptibilities  $\chi_p$  can be determined according to Eq. (5):<sup>[13]</sup>



$$\chi_p = \chi_m - \chi_D \quad (5)$$

The diamagnetic contribution  $\chi_D$  was estimated by determining the molar susceptibility  $\chi_m$  of diamagnetic  $[\text{Co}(\text{CO})_5][\text{Al}(\text{OR}^F)_4]$  in 4FB in analogy to **1**. Thus, the effective magnetic moment of **1** can be calculated by Eq. (7), where T is the temperature in Kelvin.<sup>[32]</sup>

$$\mu_{eff} = 2.828\sqrt{\chi_p T} \quad (6)$$

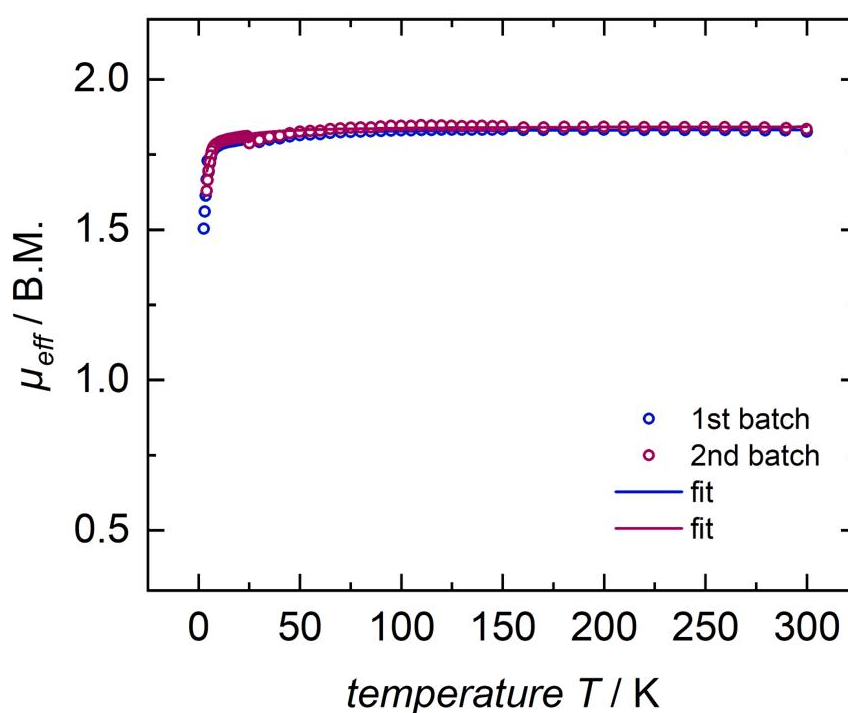

Figure S27: SQUID magnetization measurements of two independently synthesized, microcrystalline solid samples of  $[\text{Fe}(\text{CO})_5][\text{Al}(\text{OR}^F)_4]$  (**1**) in the temperature range 2-300 K with an applied magnetic field of 1 T. The solid lines represent the best global fit obtained for  $S = 1/2$ .

## 5 <sup>57</sup>Fe Mössbauer Measurements of Fe(CO)<sub>5</sub> and Na<sub>2</sub>[Fe(CO)<sub>4</sub>]

Mössbauer spectra of neutral Fe(CO)<sub>5</sub> and anionic [Fe(CO)<sub>4</sub>]<sup>2-</sup> have been collected (Figure S28 and Figure S29). The isomer shifts and quadrupole splittings are presented in Table S2.

Table S2: Isomer shifts and quadrupole splittings.

|                                   | [Fe(CO) <sub>4</sub> ] <sup>2-</sup> | Fe(CO) <sub>5</sub> |
|-----------------------------------|--------------------------------------|---------------------|
| $\delta$ [mms <sup>-1</sup> ]     | -0.16(1)                             | -0.08(1)            |
| $\Delta E_Q$ [mms <sup>-1</sup> ] | 0.19(1)                              | 2.55(1)             |

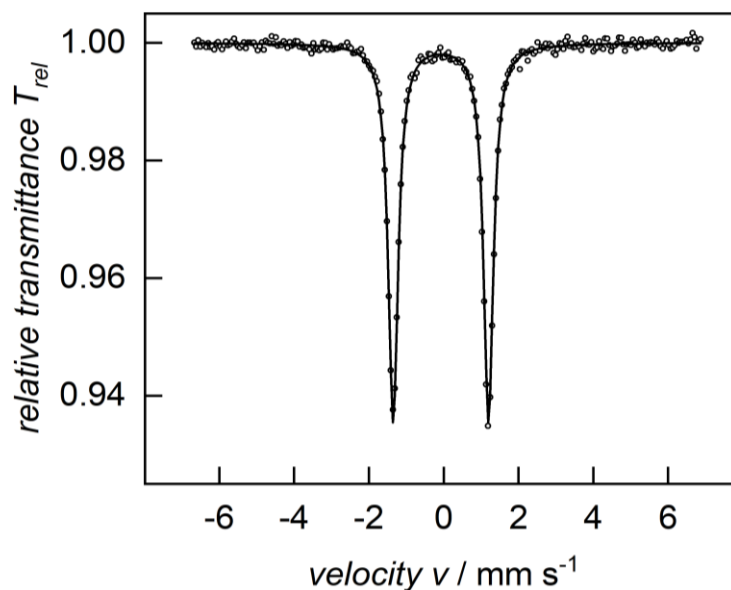

Figure S28: Zero-field <sup>57</sup>Fe Mössbauer spectrum of Fe(CO)<sub>5</sub> recorded at 77 K. The gray data points are experimental data together with a numerical fit (black line).

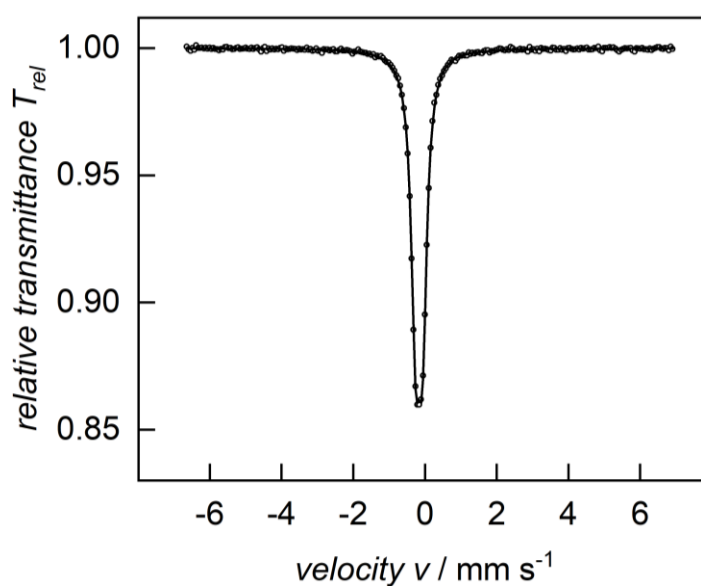

Figure S29: Zero-field <sup>57</sup>Fe Mössbauer spectrum of [Fe(CO)<sub>4</sub>]<sup>2-</sup> recorded at 77 K. The gray data points are experimental data together with a numerical fit (black line).

## 6 Crystallographic Data

Table S3: Crystallographic data of [phenazine<sup>F</sup>][F-{Al(OR<sup>F</sup>)<sub>3</sub>}<sub>2</sub>], [Fe(CO)<sub>5</sub>DFB][Al(OR<sup>F</sup>)<sub>4</sub>] and [Fe<sub>2</sub>(CO)<sub>8</sub>Br][F-{Al(OR<sup>F</sup>)<sub>3</sub>}<sub>2</sub>].

| Name                                        | [phenazine <sup>F</sup> ][F-{Al(OR <sup>F</sup> ) <sub>3</sub> } <sub>2</sub> ] | [Fe(CO) <sub>5</sub> DFB][Al(OR <sup>F</sup> ) <sub>4</sub> ]                                  | [Fe <sub>2</sub> (CO) <sub>8</sub> Br][F-{Al(OR <sup>F</sup> ) <sub>3</sub> } <sub>2</sub> ] |
|---------------------------------------------|---------------------------------------------------------------------------------|------------------------------------------------------------------------------------------------|----------------------------------------------------------------------------------------------|
| Empirical formula                           | C <sub>48</sub> Al <sub>2</sub> F <sub>73</sub> N <sub>2</sub> O <sub>6</sub>   | C <sub>54</sub> H <sub>8</sub> Al <sub>2</sub> F <sub>76</sub> Fe <sub>2</sub> O <sub>18</sub> | C <sub>32</sub> Al <sub>2</sub> BrF <sub>55</sub> Fe <sub>2</sub> O <sub>14</sub>            |
| Formula weight                              | 2141.46                                                                         | 2554.26                                                                                        | 1898.89                                                                                      |
| Temperature [K]                             | 100(2)                                                                          | 150(2)                                                                                         | 100(2)                                                                                       |
| Crystal system                              | monoclinic                                                                      | monoclinic                                                                                     | orthorhombic                                                                                 |
| Space group (number)                        | <i>P</i> 2 <sub>1</sub> / <i>c</i> (14)                                         | <i>P</i> 2/ <i>c</i> (13)                                                                      | <i>P</i> bcn (60)                                                                            |
| <i>a</i> [Å]                                | 24.734(3)                                                                       | 21.666(6)                                                                                      | 18.2753(14)                                                                                  |
| <i>b</i> [Å]                                | 18.6697(18)                                                                     | 9.826(3)                                                                                       | 13.8505(10)                                                                                  |
| <i>c</i> [Å]                                | 14.1476(14)                                                                     | 19.222(5)                                                                                      | 21.9188(16)                                                                                  |
| α [°]                                       | 90                                                                              | 90                                                                                             | 90                                                                                           |
| β [°]                                       | 102.081(4)                                                                      | 89.993(9)                                                                                      | 90                                                                                           |
| γ [°]                                       | 90                                                                              | 90                                                                                             | 90                                                                                           |
| Volume [Å <sup>3</sup> ]                    | 6388.3(11)                                                                      | 4092.1(19)                                                                                     | 5548.1(7)                                                                                    |
| Z                                           | 4                                                                               | 4                                                                                              | 4                                                                                            |
| ρ <sub>calc</sub> [gcm <sup>-3</sup> ]      | 2.227                                                                           | 2.073                                                                                          | 2.273                                                                                        |
| μ [mm <sup>-1</sup> ]                       | 0.313                                                                           | 0.614                                                                                          | 1.521                                                                                        |
| <i>F</i> (000)                              | 4132                                                                            | 2476                                                                                           | 3648                                                                                         |
| Crystal size [mm <sup>3</sup> ]             | 0.5×0.48×0.08                                                                   | 0.517×0.341×0.140                                                                              | 0.35×0.32×0.24                                                                               |
| Crystal colour                              | purple                                                                          | green                                                                                          | orange                                                                                       |
| Crystal shape                               | plate                                                                           | block                                                                                          | block                                                                                        |
| Radiation                                   | MoK <sub>α</sub> (λ=0.71073 Å)                                                  | MoK <sub>α</sub> (λ=0.71073 Å)                                                                 | MoK <sub>α</sub> (λ=0.71073 Å)                                                               |
| 2θ range [°]                                | 2.76 to 54.46 (0.78 Å)                                                          | 2.83 to 63.16 (0.68 Å)                                                                         | 3.69 to 52.80 (0.80 Å)                                                                       |
| Index ranges                                | -31 ≤ <i>h</i> ≤ 31<br>-23 ≤ <i>k</i> ≤ 23<br>-18 ≤ <i>l</i> ≤ 18               | -31 ≤ <i>h</i> ≤ 31<br>-13 ≤ <i>k</i> ≤ 14<br>-28 ≤ <i>l</i> ≤ 28                              | -22 ≤ <i>h</i> ≤ 22<br>-17 ≤ <i>k</i> ≤ 17<br>-27 ≤ <i>l</i> ≤ 27                            |
| Reflections collected                       | 311254                                                                          | 281340                                                                                         | 350530                                                                                       |
| Independent reflections                     | 14181<br><i>R</i> <sub>int</sub> = 0.1013<br><i>R</i> <sub>sigma</sub> = 0.0361 | 13549<br><i>R</i> <sub>int</sub> = 0.0537<br><i>R</i> <sub>sigma</sub> = 0.0224                | 5697<br><i>R</i> <sub>int</sub> = 0.0458<br><i>R</i> <sub>sigma</sub> = 0.0074               |
| Completeness to θ = 25.242°                 | 100.0 %                                                                         | 99.9 %                                                                                         | 100.0 %                                                                                      |
| Data / Restraints / Parameters              | 14181/7893/1310                                                                 | 13549/14489/1627                                                                               | 5697/2922/607                                                                                |
| Goodness-of-fit on <i>F</i> <sup>2</sup>    | 1.036                                                                           | 1.066                                                                                          | 1.351                                                                                        |
| Final <i>R</i> indexes [I ≥ 2σ( <i>I</i> )] | <i>R</i> <sub>1</sub> = 0.0398<br><i>wR</i> <sub>2</sub> = 0.0945               | <i>R</i> <sub>1</sub> = 0.0574<br><i>wR</i> <sub>2</sub> = 0.1561                              | <i>R</i> <sub>1</sub> = 0.0664<br><i>wR</i> <sub>2</sub> = 0.1499                            |
| Final <i>R</i> indexes [all data]           | <i>R</i> <sub>1</sub> = 0.0565<br><i>wR</i> <sub>2</sub> = 0.1051               | <i>R</i> <sub>1</sub> = 0.0769<br><i>wR</i> <sub>2</sub> = 0.1788                              | <i>R</i> <sub>1</sub> = 0.0672<br><i>wR</i> <sub>2</sub> = 0.1501                            |
| Largest peak/hole [eÅ <sup>-3</sup> ]       | 0.46/-0.33                                                                      | 0.69/-0.42                                                                                     | 0.92/-0.67                                                                                   |
| CCDC Nr.                                    | 2144643                                                                         | 2144645                                                                                        | 2144641                                                                                      |

Table S4: Crystallographic data of [Fe(CO)<sub>5</sub>][Al(OR<sup>F</sup>)<sub>4</sub>] (**1**) and [Fe(CO)<sub>5</sub>][F-{Al(OR<sup>F</sup>)<sub>3</sub>}<sub>2</sub>] (**2**).

| Name                                        | [Fe(CO) <sub>5</sub> ][Al(OR <sup>F</sup> ) <sub>4</sub> ]                      | [Fe(CO) <sub>5</sub> ][F-{Al(OR <sup>F</sup> ) <sub>3</sub> } <sub>2</sub> ]    |
|---------------------------------------------|---------------------------------------------------------------------------------|---------------------------------------------------------------------------------|
| Empirical formula                           | C <sub>21</sub> AlF <sub>36</sub> FeO <sub>9</sub>                              | C <sub>29</sub> Al <sub>2</sub> F <sub>55</sub> FeO <sub>11</sub>               |
| Formula weight                              | 1163.04                                                                         | 1679.10                                                                         |
| Temperature [K]                             | 100(2)                                                                          | 100(2)                                                                          |
| Crystal system                              | orthorhombic                                                                    | triclinic                                                                       |
| Space group (number)                        | <i>P</i> 2 <sub>1</sub> 2 <sub>1</sub> 2 <sub>1</sub> (19)                      | <i>P</i> $\bar{1}$ (2)                                                          |
| <i>a</i> [Å]                                | 14.1960(8)                                                                      | 10.718(4)                                                                       |
| <i>b</i> [Å]                                | 16.8308(10)                                                                     | 11.572(5)                                                                       |
| <i>c</i> [Å]                                | 29.4979(19)                                                                     | 21.359(7)                                                                       |
| $\alpha$ [°]                                | 90                                                                              | 101.657(14)                                                                     |
| $\beta$ [°]                                 | 90                                                                              | 101.838(16)                                                                     |
| $\gamma$ [°]                                | 90                                                                              | 97.805(14)                                                                      |
| Volume [Å <sup>3</sup> ]                    | 7047.9(7)                                                                       | 2495.6(16)                                                                      |
| <i>Z</i>                                    | 8                                                                               | 2                                                                               |
| $\rho_{\text{calc}}$ [gcm <sup>-3</sup> ]   | 2.192                                                                           | 2.235                                                                           |
| $\mu$ [mm <sup>-1</sup> ]                   | 0.693                                                                           | 0.599                                                                           |
| <i>F</i> (000)                              | 4488                                                                            | 1618                                                                            |
| Crystal size [mm <sup>3</sup> ]             | 0.28×0.15×0.07                                                                  | 0.222×0.182×0.058                                                               |
| Crystal colour                              | green                                                                           | green                                                                           |
| Crystal shape                               | block                                                                           | plate                                                                           |
| Radiation                                   | MoK $\alpha$ ( $\lambda$ =0.71073 Å)                                            | MoK $\alpha$ ( $\lambda$ =0.71073 Å)                                            |
| 2 $\theta$ range [°]                        | 2.76 to 55.82 (0.76 Å)                                                          | 3.66 to 54.56 (0.78 Å)                                                          |
| Index ranges                                | -18 ≤ <i>h</i> ≤ 18<br>-21 ≤ <i>k</i> ≤ 22<br>-38 ≤ <i>l</i> ≤ 38               | -13 ≤ <i>h</i> ≤ 13<br>-14 ≤ <i>k</i> ≤ 14<br>-27 ≤ <i>l</i> ≤ 27               |
| Reflections collected                       | 147475                                                                          | 180046                                                                          |
| Independent reflections                     | 16846<br><i>R</i> <sub>int</sub> = 0.0626<br><i>R</i> <sub>sigma</sub> = 0.0391 | 11181<br><i>R</i> <sub>int</sub> = 0.0624<br><i>R</i> <sub>sigma</sub> = 0.0219 |
| Completeness to $\theta = 25.242^\circ$     | 100.0 %                                                                         | 99.9 %                                                                          |
| Data / Restraints / Parameters              | 16846/12780/1347                                                                | 11181/13308/1267                                                                |
| Goodness-of-fit on <i>F</i> <sup>2</sup>    | 1.062                                                                           | 1.129                                                                           |
| Final <i>R</i> indexes [I ≥ 2σ( <i>I</i> )] | <i>R</i> <sub>1</sub> = 0.0383<br><i>wR</i> <sub>2</sub> = 0.0819               | <i>R</i> <sub>1</sub> = 0.0494<br><i>wR</i> <sub>2</sub> = 0.1189               |
| Final <i>R</i> indexes [all data]           | <i>R</i> <sub>1</sub> = 0.0545<br><i>wR</i> <sub>2</sub> = 0.0900               | <i>R</i> <sub>1</sub> = 0.0587<br><i>wR</i> <sub>2</sub> = 0.1234               |
| Largest peak/hole [eÅ <sup>-3</sup> ]       | 0.69/-0.40                                                                      | 1.04/-0.40                                                                      |
| Flack X parameter                           | 0.029(14)                                                                       |                                                                                 |
| CCDC Nr.                                    | 2144646                                                                         | 2144650                                                                         |

**Atom coordinates, bond lengths and bond angles:**Table S5. Atomic coordinates and  $U_{eq}$  [Å<sup>2</sup>] for [phenazine<sup>F</sup>][F-{Al(OR<sup>F</sup>)<sub>3</sub>}<sub>2</sub>].

| Atom | x          | y           | z           | $U_{eq}$    |
|------|------------|-------------|-------------|-------------|
| Al01 | 0.46284(2) | 0.42699(3)  | 0.53217(4)  | 0.01499(11) |
| F1   | 0.13772(5) | 0.36984(6)  | 0.95249(10) | 0.0310(3)   |
| Al02 | 0.03972(2) | 0.57069(3)  | 0.46838(4)  | 0.01680(12) |
| F2   | 0.05078(5) | 0.44851(7)  | 0.96106(10) | 0.0337(3)   |
| N2   | 0.25693(7) | 0.57465(8)  | 1.03347(12) | 0.0193(3)   |
| C2   | 0.20488(8) | 0.54297(10) | 1.01836(13) | 0.0191(4)   |
| C3   | 0.15678(8) | 0.58168(10) | 1.02454(15) | 0.0226(4)   |
| C4   | 0.10580(8) | 0.55053(11) | 1.00376(15) | 0.0228(4)   |
| F5   | 0.36662(5) | 0.63443(6)  | 1.06831(10) | 0.0294(3)   |
| C5   | 0.10015(8) | 0.47869(11) | 0.97838(15) | 0.0239(4)   |
| F6   | 0.45228(5) | 0.55492(7)  | 1.05694(10) | 0.0302(3)   |
| C6   | 0.14614(8) | 0.43899(10) | 0.97376(15) | 0.0224(4)   |
| F7   | 0.44180(5) | 0.41399(7)  | 1.01787(9)  | 0.0286(3)   |
| C7   | 0.29826(8) | 0.46170(10) | 1.00385(13) | 0.0182(4)   |
| F8   | 0.34368(5) | 0.35078(6)  | 0.98851(9)  | 0.0283(3)   |
| F008 | 0.500000   | 0.500000    | 0.500000    | 0.0300(4)   |
| C8   | 0.30394(8) | 0.53542(10) | 1.02860(13) | 0.0187(4)   |
| F9   | 0.27972(6) | 0.63765(7)  | 1.21486(9)  | 0.0350(3)   |
| C9   | 0.35729(8) | 0.56560(10) | 1.04607(14) | 0.0210(4)   |
| F10  | 0.29206(6) | 0.78281(8)  | 1.23701(10) | 0.0418(3)   |
| F00G | 0.000000   | 0.500000    | 0.500000    | 0.0332(4)   |
| C10  | 0.40276(8) | 0.52503(11) | 1.04065(14) | 0.0222(4)   |
| F11  | 0.28072(6) | 0.86681(7)  | 1.07966(12) | 0.0429(4)   |
| C11  | 0.39714(8) | 0.45250(11) | 1.01957(14) | 0.0217(4)   |
| F12  | 0.25536(6) | 0.80982(7)  | 0.89947(11) | 0.0407(3)   |
| C12  | 0.34607(8) | 0.42132(10) | 1.00286(14) | 0.0209(4)   |
| F13  | 0.24647(6) | 0.66470(7)  | 0.87912(9)  | 0.0339(3)   |
| C13  | 0.23847(8) | 0.36817(10) | 0.91987(14) | 0.0194(4)   |
| F14  | 0.23306(6) | 0.29493(7)  | 1.05172(9)  | 0.0341(3)   |
| C14  | 0.23200(9) | 0.30125(11) | 0.95734(15) | 0.0237(4)   |
| F15  | 0.21593(6) | 0.17802(6)  | 0.93382(10) | 0.0366(3)   |
| C15  | 0.22343(9) | 0.24222(11) | 0.89786(16) | 0.0262(4)   |
| F16  | 0.21574(6) | 0.19298(7)  | 0.74358(10) | 0.0343(3)   |
| C16  | 0.22350(8) | 0.24994(11) | 0.80095(16) | 0.0248(4)   |
| F17  | 0.23504(6) | 0.32289(7)  | 0.67079(9)  | 0.0331(3)   |
| C17  | 0.23227(8) | 0.31605(11) | 0.76325(14) | 0.0232(4)   |
| F18  | 0.24690(5) | 0.43981(6)  | 0.78800(8)  | 0.0244(2)   |
| C18  | 0.23893(8) | 0.37528(10) | 0.82287(14) | 0.0201(4)   |
| C19  | 0.26184(8) | 0.65127(10) | 1.04659(15) | 0.0209(4)   |
| C20  | 0.27366(8) | 0.68058(11) | 1.13844(15) | 0.0246(4)   |
| C21  | 0.27996(9) | 0.75361(12) | 1.14926(17) | 0.0288(5)   |
| C22  | 0.27405(9) | 0.79665(11) | 1.06868(18) | 0.0294(5)   |
| C23  | 0.26134(8) | 0.76792(11) | 0.97693(17) | 0.0276(5)   |
| C24  | 0.25615(8) | 0.69483(11) | 0.96638(15) | 0.0238(4)   |
| N1   | 0.24567(7) | 0.43141(8)  | 0.97979(11) | 0.0182(3)   |
| C1   | 0.19916(8) | 0.46958(10) | 0.99134(13) | 0.0187(4)   |
| F3   | 0.06106(5) | 0.58817(6)  | 1.00844(10) | 0.0302(3)   |
| F4   | 0.15860(5) | 0.65037(6)  | 1.05047(10) | 0.0321(3)   |
| O1_1 | 0.43999(6) | 0.45886(8)  | 0.62994(10) | 0.0226(3)   |
| C1_1 | 0.39696(8) | 0.46123(10) | 0.67627(13) | 0.0197(4)   |
| C2_1 | 0.40677(9) | 0.52642(11) | 0.74638(14) | 0.0245(4)   |

|      |              |             |             |           |
|------|--------------|-------------|-------------|-----------|
| F1_1 | 0.39641(6)   | 0.58748(6)  | 0.69782(9)  | 0.0327(3) |
| F2_1 | 0.37391(6)   | 0.52414(7)  | 0.81111(9)  | 0.0318(3) |
| F3_1 | 0.45853(5)   | 0.52859(7)  | 0.79606(9)  | 0.0309(3) |
| C3_1 | 0.39656(8)   | 0.39121(11) | 0.73554(15) | 0.0237(4) |
| F4_1 | 0.40145(5)   | 0.33465(6)  | 0.68102(9)  | 0.0301(3) |
| F5_1 | 0.43827(5)   | 0.38995(7)  | 0.81192(9)  | 0.0306(3) |
| F6_1 | 0.34970(5)   | 0.38353(6)  | 0.76805(10) | 0.0311(3) |
| C4_1 | 0.34076(8)   | 0.47019(11) | 0.60382(15) | 0.0236(4) |
| F7_1 | 0.32398(5)   | 0.40779(6)  | 0.56125(9)  | 0.0285(3) |
| F8_1 | 0.30089(5)   | 0.49334(7)  | 0.64716(9)  | 0.0294(3) |
| F9_1 | 0.34545(5)   | 0.51649(7)  | 0.53502(9)  | 0.0286(3) |
| O1_2 | 0.40984(6)   | 0.41378(8)  | 0.43593(10) | 0.0284(3) |
| C1_2 | 0.38946(8)   | 0.38789(10) | 0.34645(13) | 0.0196(4) |
| C2_2 | 0.37504(9)   | 0.30729(11) | 0.35219(16) | 0.0271(4) |
| F1_2 | 0.42028(6)   | 0.26727(7)  | 0.36359(10) | 0.0366(3) |
| F2_2 | 0.33993(6)   | 0.28489(7)  | 0.27281(11) | 0.0394(3) |
| F3_2 | 0.35139(6)   | 0.29529(7)  | 0.42695(11) | 0.0414(3) |
| C3_2 | 0.33611(8)   | 0.43045(11) | 0.30370(14) | 0.0237(4) |
| F4_2 | 0.34371(6)   | 0.50005(7)  | 0.31723(11) | 0.0393(3) |
| F5_2 | 0.29505(5)   | 0.41099(7)  | 0.34494(9)  | 0.0288(3) |
| F6_2 | 0.31918(6)   | 0.41986(8)  | 0.20820(9)  | 0.0381(3) |
| C4_2 | 0.43228(9)   | 0.39685(11) | 0.28113(15) | 0.0262(4) |
| F7_2 | 0.43422(6)   | 0.46496(7)  | 0.25335(11) | 0.0405(3) |
| F8_2 | 0.41973(6)   | 0.35694(8)  | 0.20128(9)  | 0.0362(3) |
| F9_2 | 0.48241(5)   | 0.37912(8)  | 0.32859(9)  | 0.0339(3) |
| O1_3 | 0.50959(8)   | 0.36071(9)  | 0.55251(12) | 0.0445(5) |
| C1_3 | 0.54317(8)   | 0.30806(10) | 0.59522(14) | 0.0227(4) |
| C2_3 | 0.55660(9)   | 0.31737(12) | 0.70696(16) | 0.0294(5) |
| F1_3 | 0.51450(6)   | 0.29640(9)  | 0.74486(10) | 0.0437(4) |
| F2_3 | 0.60075(5)   | 0.28024(8)  | 0.74963(9)  | 0.0369(3) |
| F3_3 | 0.56588(8)   | 0.38576(8)  | 0.73017(11) | 0.0523(4) |
| C3_3 | 0.59741(9)   | 0.31095(12) | 0.55731(17) | 0.0330(5) |
| F4_3 | 0.58764(7)   | 0.32029(9)  | 0.46258(11) | 0.0480(4) |
| F5_3 | 0.62935(7)   | 0.36487(9)  | 0.59774(13) | 0.0576(5) |
| F6_3 | 0.62682(5)   | 0.25059(8)  | 0.57718(11) | 0.0406(3) |
| C4_3 | 0.51488(9)   | 0.23463(12) | 0.56872(17) | 0.0318(5) |
| F7_3 | 0.51726(6)   | 0.21547(8)  | 0.47916(10) | 0.0397(3) |
| F8_3 | 0.53777(7)   | 0.18329(7)  | 0.62833(11) | 0.0482(4) |
| F9_3 | 0.46166(6)   | 0.23871(10) | 0.57364(11) | 0.0526(4) |
| O1_4 | 0.08853(6)   | 0.58887(10) | 0.56811(11) | 0.0374(4) |
| C1_4 | 0.10493(8)   | 0.60841(11) | 0.66158(14) | 0.0246(4) |
| C2_4 | 0.12268(10)  | 0.68835(13) | 0.6657(2)   | 0.0429(6) |
| F1_4 | 0.07878(7)   | 0.73047(8)  | 0.64762(13) | 0.0529(4) |
| F2_4 | 0.15309(8)   | 0.70591(8)  | 0.75157(15) | 0.0742(6) |
| F3_4 | 0.15229(7)   | 0.70184(9)  | 0.59952(16) | 0.0700(6) |
| C3_4 | 0.15513(9)   | 0.56120(11) | 0.70806(15) | 0.0248(4) |
| F4_4 | 0.14643(6)   | 0.49415(7)  | 0.68120(11) | 0.0416(3) |
| F5_4 | 0.20127(5)   | 0.58241(7)  | 0.68311(10) | 0.0352(3) |
| F6_4 | 0.16476(6)   | 0.56254(7)  | 0.80500(9)  | 0.0365(3) |
| C4_4 | 0.05808(10)  | 0.59746(14) | 0.71723(16) | 0.0356(5) |
| F7_4 | 0.05203(6)   | 0.52793(9)  | 0.73397(13) | 0.0558(5) |
| F8_4 | 0.06781(7)   | 0.63134(11) | 0.80154(11) | 0.0635(5) |
| F9_4 | 0.01030(6)   | 0.62048(9)  | 0.66559(10) | 0.0430(4) |
| O1_5 | -0.00673(11) | 0.63617(13) | 0.43585(17) | 0.0398(6) |
| C1_5 | -0.03758(10) | 0.69206(13) | 0.39563(18) | 0.0228(5) |
| C2_5 | -0.04771(11) | 0.68732(15) | 0.28402(19) | 0.0341(6) |
| F1_5 | -0.00295(8)  | 0.70753(12) | 0.25282(12) | 0.0542(5) |

|      |              |             |             |           |
|------|--------------|-------------|-------------|-----------|
| F2_5 | -0.08944(17) | 0.72793(17) | 0.2401(3)   | 0.0502(7) |
| F3_5 | -0.05877(9)  | 0.62020(10) | 0.25459(14) | 0.0552(5) |
| C3_5 | -0.09363(11) | 0.68922(15) | 0.4281(2)   | 0.0320(6) |
| F4_5 | -0.08658(8)  | 0.67656(11) | 0.52141(13) | 0.0490(5) |
| F5_5 | -0.12535(7)  | 0.63746(9)  | 0.38083(15) | 0.0465(5) |
| F6_5 | -0.12156(13) | 0.75054(18) | 0.4098(3)   | 0.0453(6) |
| C4_5 | -0.00776(10) | 0.76333(13) | 0.43053(19) | 0.0310(5) |
| F7_5 | -0.01273(6)  | 0.77916(9)  | 0.51979(11) | 0.0407(4) |
| F8_5 | -0.02862(17) | 0.81806(14) | 0.3745(3)   | 0.0465(6) |
| F9_5 | 0.04583(12)  | 0.7587(2)   | 0.43026(18) | 0.0475(7) |
| O1_6 | 0.06777(6)   | 0.53357(9)  | 0.37949(11) | 0.0316(3) |
| C1_6 | 0.11338(9)   | 0.52926(11) | 0.34012(15) | 0.0258(4) |
| C2_6 | 0.12157(11)  | 0.60107(12) | 0.29017(17) | 0.0362(5) |
| F1_6 | 0.08368(7)   | 0.60941(8)  | 0.20938(11) | 0.0515(4) |
| F2_6 | 0.17113(7)   | 0.60566(8)  | 0.26708(12) | 0.0520(4) |
| F3_6 | 0.11669(7)   | 0.65572(7)  | 0.34823(11) | 0.0474(4) |
| C3_6 | 0.16575(10)  | 0.51213(13) | 0.41831(17) | 0.0354(5) |
| F4_6 | 0.15434(7)   | 0.46276(8)  | 0.47873(11) | 0.0485(4) |
| F5_6 | 0.18335(6)   | 0.57007(8)  | 0.47057(11) | 0.0425(3) |
| F6_6 | 0.20685(7)   | 0.48791(10) | 0.37995(12) | 0.0580(5) |
| C4_6 | 0.10351(10)  | 0.46827(12) | 0.26404(16) | 0.0325(5) |
| F7_6 | 0.10732(7)   | 0.40463(7)  | 0.30639(11) | 0.0449(4) |
| F8_6 | 0.14061(6)   | 0.46989(8)  | 0.20670(10) | 0.0417(3) |
| F9_6 | 0.05400(6)   | 0.47296(8)  | 0.20674(10) | 0.0431(3) |
| O1_7 | -0.0046(8)   | 0.6251(10)  | 0.3975(13)  | 0.020(4)  |
| C1_7 | -0.0358(7)   | 0.6843(10)  | 0.3707(11)  | 0.028(4)  |
| C2_7 | 0.0038(7)    | 0.7487(9)   | 0.3727(14)  | 0.039(4)  |
| F1_7 | 0.0435(13)   | 0.748(2)    | 0.4518(17)  | 0.047(5)  |
| F2_7 | -0.0231(18)  | 0.8103(14)  | 0.366(4)    | 0.049(5)  |
| F3_7 | 0.0282(8)    | 0.7448(12)  | 0.2975(14)  | 0.060(5)  |
| C3_7 | -0.0704(7)   | 0.6716(10)  | 0.2677(12)  | 0.038(4)  |
| F4_7 | -0.1120(6)   | 0.6283(9)   | 0.2714(13)  | 0.050(5)  |
| F5_7 | -0.0402(8)   | 0.6415(12)  | 0.2125(13)  | 0.056(4)  |
| F6_7 | -0.0905(18)  | 0.7328(15)  | 0.227(3)    | 0.048(5)  |
| C4_7 | -0.0749(7)   | 0.6971(10)  | 0.4408(13)  | 0.033(4)  |
| F7_7 | -0.0982(8)   | 0.6363(9)   | 0.461(2)    | 0.065(7)  |
| F8_7 | -0.1162(13)  | 0.7411(19)  | 0.402(3)    | 0.046(5)  |
| F9_7 | -0.0497(8)   | 0.7262(12)  | 0.5243(13)  | 0.068(6)  |

$U_{eq}$  is defined as 1/3 of the trace of the orthogonalized  $U_{ij}$  tensor.

Table S6: Bond lengths and angles for [phenazine<sup>F</sup>][F-{Al(OR<sup>F</sup>)<sub>3</sub>}<sub>2</sub>].

| Atom-Atom | Length [Å] |        |          |
|-----------|------------|--------|----------|
| Al01-O1_3 | 1.6770(16) | N2-C19 | 1.444(2) |
| Al01-O1_2 | 1.6989(15) | C2-C3  | 1.410(3) |
| Al01-O1_1 | 1.7070(14) | C2-C1  | 1.422(3) |
| Al01-F008 | 1.7564(5)  | C3-F4  | 1.332(2) |
| F1-C6     | 1.332(2)   | C3-C4  | 1.364(3) |
| Al02-O1_7 | 1.668(18)  | C4-F3  | 1.324(2) |
| Al02-O1_5 | 1.675(2)   | C4-C5  | 1.388(3) |
| Al02-O1_4 | 1.6884(16) | F5-C9  | 1.331(2) |
| Al02-O1_6 | 1.7053(15) | C5-C6  | 1.371(3) |
| Al02-F00G | 1.7581(6)  | F6-C10 | 1.322(2) |
| F2-C5     | 1.320(2)   | C6-C1  | 1.404(3) |
| N2-C8     | 1.388(2)   | F7-C11 | 1.322(2) |
| N2-C2     | 1.392(2)   | C7-N1  | 1.394(2) |
|           |            | C7-C12 | 1.405(3) |

|           |          |           |           |
|-----------|----------|-----------|-----------|
| C7-C8     | 1.420(3) | C1_3-C3_3 | 1.546(3)  |
| F8-C12    | 1.332(2) | C1_3-C4_3 | 1.549(3)  |
| C8-C9     | 1.409(3) | C1_3-C2_3 | 1.556(3)  |
| F9-C20    | 1.329(2) | C2_3-F1_3 | 1.326(3)  |
| C9-C10    | 1.371(3) | C2_3-F3_3 | 1.326(3)  |
| F10-C21   | 1.331(3) | C2_3-F2_3 | 1.327(2)  |
| C10-C11   | 1.387(3) | C3_3-F4_3 | 1.323(3)  |
| F11-C22   | 1.325(2) | C3_3-F5_3 | 1.332(3)  |
| C11-C12   | 1.366(3) | C3_3-F6_3 | 1.339(3)  |
| F12-C23   | 1.329(2) | C4_3-F8_3 | 1.323(3)  |
| F13-C24   | 1.332(2) | C4_3-F7_3 | 1.330(3)  |
| C13-C14   | 1.380(3) | C4_3-F9_3 | 1.335(3)  |
| C13-C18   | 1.381(3) | O1_4-C1_4 | 1.350(2)  |
| C13-N1    | 1.443(2) | C1_4-C4_4 | 1.545(3)  |
| F14-C14   | 1.335(2) | C1_4-C3_4 | 1.552(3)  |
| C14-C15   | 1.376(3) | C1_4-C2_4 | 1.553(3)  |
| F15-C15   | 1.330(2) | C2_4-F1_4 | 1.322(3)  |
| C15-C16   | 1.379(3) | C2_4-F3_4 | 1.328(3)  |
| F16-C16   | 1.327(2) | C2_4-F2_4 | 1.329(3)  |
| C16-C17   | 1.380(3) | C3_4-F4_4 | 1.313(2)  |
| F17-C17   | 1.330(2) | C3_4-F5_4 | 1.324(2)  |
| C17-C18   | 1.380(3) | C3_4-F6_4 | 1.342(2)  |
| F18-C18   | 1.332(2) | C4_4-F9_4 | 1.324(3)  |
| C19-C24   | 1.379(3) | C4_4-F8_4 | 1.327(3)  |
| C19-C20   | 1.384(3) | C4_4-F7_4 | 1.333(3)  |
| C20-C21   | 1.377(3) | O1_5-C1_5 | 1.347(3)  |
| C21-C22   | 1.377(3) | C1_5-C2_5 | 1.549(3)  |
| C22-C23   | 1.379(3) | C1_5-C3_5 | 1.550(3)  |
| C23-C24   | 1.376(3) | C1_5-C4_5 | 1.551(3)  |
| N1-C1     | 1.392(2) | C2_5-F2_5 | 1.326(4)  |
| O1_1-C1_1 | 1.362(2) | C2_5-F1_5 | 1.329(3)  |
| C1_1-C4_1 | 1.554(3) | C2_5-F3_5 | 1.331(3)  |
| C1_1-C3_1 | 1.554(3) | C3_5-F4_5 | 1.316(3)  |
| C1_1-C2_1 | 1.557(3) | C3_5-F5_5 | 1.333(3)  |
| C2_1-F3_1 | 1.326(2) | C3_5-F6_5 | 1.334(3)  |
| C2_1-F1_1 | 1.328(2) | C4_5-F7_5 | 1.327(3)  |
| C2_1-F2_1 | 1.346(2) | C4_5-F9_5 | 1.329(4)  |
| C3_1-F4_1 | 1.328(2) | C4_5-F8_5 | 1.329(4)  |
| C3_1-F5_1 | 1.329(2) | O1_6-C1_6 | 1.361(2)  |
| C3_1-F6_1 | 1.341(2) | C1_6-C2_6 | 1.548(3)  |
| C4_1-F9_1 | 1.325(2) | C1_6-C3_6 | 1.550(3)  |
| C4_1-F7_1 | 1.337(2) | C1_6-C4_6 | 1.551(3)  |
| C4_1-F8_1 | 1.337(2) | C2_6-F1_6 | 1.327(3)  |
| O1_2-C1_2 | 1.350(2) | C2_6-F3_6 | 1.331(3)  |
| C1_2-C3_2 | 1.551(3) | C2_6-F2_6 | 1.336(3)  |
| C1_2-C2_2 | 1.553(3) | C3_6-F4_6 | 1.327(3)  |
| C1_2-C4_2 | 1.553(3) | C3_6-F6_6 | 1.328(3)  |
| C2_2-F1_2 | 1.327(2) | C3_6-F5_6 | 1.331(3)  |
| C2_2-F3_2 | 1.330(3) | C4_6-F9_6 | 1.322(3)  |
| C2_2-F2_2 | 1.335(3) | C4_6-F7_6 | 1.325(3)  |
| C3_2-F4_2 | 1.321(2) | C4_6-F8_6 | 1.346(2)  |
| C3_2-F5_2 | 1.323(2) | O1_7-C1_7 | 1.356(14) |
| C3_2-F6_2 | 1.343(2) | C1_7-C4_7 | 1.541(12) |
| C4_2-F9_2 | 1.323(2) | C1_7-C3_7 | 1.546(12) |
| C4_2-F8_2 | 1.335(2) | C1_7-C2_7 | 1.548(12) |
| C4_2-F7_2 | 1.335(2) | C2_7-F2_7 | 1.323(13) |
| O1_3-C1_3 | 1.346(2) | C2_7-F1_7 | 1.325(13) |



|           |           |
|-----------|-----------|
| C2_7-F3_7 | 1.329(13) |
| C3_7-F5_7 | 1.315(13) |
| C3_7-F4_7 | 1.318(13) |
| C3_7-F6_7 | 1.327(13) |
| C4_7-F7_7 | 1.329(13) |
| C4_7-F9_7 | 1.332(13) |
| C4_7-F8_7 | 1.334(13) |

| Atom-Atom-Atom | Angle [°]  |
|----------------|------------|
| O1_3-AlO1-O1_2 | 114.78(9)  |
| O1_3-AlO1-O1_1 | 116.85(8)  |
| O1_2-AlO1-O1_1 | 111.67(7)  |
| O1_3-AlO1-F008 | 103.75(8)  |
| O1_2-AlO1-F008 | 105.24(6)  |
| O1_1-AlO1-F008 | 102.68(5)  |
| O1_7-AlO2-O1_4 | 130.2(6)   |
| O1_5-AlO2-O1_4 | 114.34(12) |
| O1_7-AlO2-O1_6 | 97.0(6)    |
| O1_5-AlO2-O1_6 | 117.10(10) |
| O1_4-AlO2-O1_6 | 111.59(8)  |
| O1_7-AlO2-F00G | 106.2(7)   |
| O1_5-AlO2-F00G | 103.31(10) |
| O1_4-AlO2-F00G | 106.15(7)  |
| O1_6-AlO2-F00G | 102.59(6)  |
| C8-N2-C2       | 121.70(16) |
| C8-N2-C19      | 118.70(16) |
| C2-N2-C19      | 119.40(16) |
| N2-C2-C3       | 122.54(17) |
| N2-C2-C1       | 119.19(17) |
| C3-C2-C1       | 118.21(17) |
| F4-C3-C4       | 116.51(17) |
| F4-C3-C2       | 122.01(18) |
| C4-C3-C2       | 121.48(18) |
| F3-C4-C3       | 120.51(18) |
| F3-C4-C5       | 119.07(18) |
| C3-C4-C5       | 120.42(18) |
| F2-C5-C6       | 120.31(18) |
| F2-C5-C4       | 119.97(18) |
| C6-C5-C4       | 119.69(18) |
| F1-C6-C5       | 116.29(18) |
| F1-C6-C1       | 122.03(18) |
| C5-C6-C1       | 121.68(18) |
| N1-C7-C12      | 121.62(17) |
| N1-C7-C8       | 119.51(17) |
| C12-C7-C8      | 118.86(17) |
| AlO1-F008-AlO1 | 180.0      |
| N2-C8-C9       | 122.95(17) |
| N2-C8-C7       | 118.90(17) |
| C9-C8-C7       | 118.15(17) |
| F5-C9-C10      | 116.28(17) |
| F5-C9-C8       | 122.49(17) |
| C10-C9-C8      | 121.23(18) |
| AlO2-F00G-AlO2 | 180.0      |
| F6-C10-C9      | 119.86(18) |
| F6-C10-C11     | 119.80(18) |
| C9-C10-C11     | 120.32(18) |
| F7-C11-C12     | 120.73(18) |

|                |            |
|----------------|------------|
| F7-C11-C10     | 119.22(18) |
| C12-C11-C10    | 120.03(18) |
| F8-C12-C11     | 117.24(17) |
| F8-C12-C7      | 121.43(17) |
| C11-C12-C7     | 121.30(18) |
| C14-C13-C18    | 119.64(18) |
| C14-C13-N1     | 121.69(17) |
| C18-C13-N1     | 118.67(17) |
| F14-C14-C15    | 120.61(18) |
| F14-C14-C13    | 118.99(18) |
| C15-C14-C13    | 120.39(19) |
| F15-C15-C14    | 120.25(19) |
| F15-C15-C16    | 120.25(19) |
| C14-C15-C16    | 119.49(19) |
| F16-C16-C15    | 119.62(19) |
| F16-C16-C17    | 119.65(19) |
| C15-C16-C17    | 120.73(18) |
| F17-C17-C18    | 120.01(18) |
| F17-C17-C16    | 120.70(18) |
| C18-C17-C16    | 119.27(18) |
| F18-C18-C17    | 120.43(17) |
| F18-C18-C13    | 119.17(17) |
| C17-C18-C13    | 120.39(18) |
| C24-C19-C20    | 120.31(18) |
| C24-C19-N2     | 119.13(18) |
| C20-C19-N2     | 120.53(18) |
| F9-C20-C21     | 121.1(2)   |
| F9-C20-C19     | 119.42(18) |
| C21-C20-C19    | 119.5(2)   |
| F10-C21-C22    | 119.8(2)   |
| F10-C21-C20    | 120.5(2)   |
| C22-C21-C20    | 119.7(2)   |
| F11-C22-C21    | 119.4(2)   |
| F11-C22-C23    | 119.5(2)   |
| C21-C22-C23    | 121.07(19) |
| F12-C23-C24    | 120.2(2)   |
| F12-C23-C22    | 120.76(19) |
| C24-C23-C22    | 119.1(2)   |
| F13-C24-C23    | 120.93(19) |
| F13-C24-C19    | 118.77(18) |
| C23-C24-C19    | 120.3(2)   |
| C1-N1-C7       | 121.04(16) |
| C1-N1-C13      | 119.00(16) |
| C7-N1-C13      | 118.01(15) |
| N1-C1-C6       | 122.36(17) |
| N1-C1-C2       | 119.14(17) |
| C6-C1-C2       | 118.46(17) |
| C1_1-O1_1-AlO1 | 145.64(13) |
| O1_1-C1_1-C4_1 | 111.54(15) |
| O1_1-C1_1-C3_1 | 109.04(15) |
| C4_1-C1_1-C3_1 | 109.91(15) |
| O1_1-C1_1-C2_1 | 107.37(15) |
| C4_1-C1_1-C2_1 | 109.55(16) |
| C3_1-C1_1-C2_1 | 109.36(15) |
| F3_1-C2_1-F1_1 | 107.97(16) |
| F3_1-C2_1-F2_1 | 107.09(16) |
| F1_1-C2_1-F2_1 | 107.49(16) |

|                |            |                |            |
|----------------|------------|----------------|------------|
| F3_1-C2_1-C1_1 | 111.47(16) | F5_3-C3_3-C1_3 | 110.91(19) |
| F1_1-C2_1-C1_1 | 110.73(16) | F6_3-C3_3-C1_3 | 111.74(18) |
| F2_1-C2_1-C1_1 | 111.90(16) | F8_3-C4_3-F7_3 | 108.31(19) |
| F4_1-C3_1-F5_1 | 107.98(16) | F8_3-C4_3-F9_3 | 107.65(19) |
| F4_1-C3_1-F6_1 | 107.72(16) | F7_3-C4_3-F9_3 | 107.81(18) |
| F5_1-C3_1-F6_1 | 107.38(16) | F8_3-C4_3-C1_3 | 112.05(18) |
| F4_1-C3_1-C1_1 | 110.10(16) | F7_3-C4_3-C1_3 | 111.16(18) |
| F5_1-C3_1-C1_1 | 111.23(16) | F9_3-C4_3-C1_3 | 109.71(19) |
| F6_1-C3_1-C1_1 | 112.25(16) | C1_4-O1_4-AI02 | 152.74(15) |
| F9_1-C4_1-F7_1 | 107.71(16) | O1_4-C1_4-C4_4 | 111.09(17) |
| F9_1-C4_1-F8_1 | 108.19(16) | O1_4-C1_4-C3_4 | 108.15(17) |
| F7_1-C4_1-F8_1 | 107.39(16) | C4_4-C1_4-C3_4 | 109.13(17) |
| F9_1-C4_1-C1_1 | 110.56(16) | O1_4-C1_4-C2_4 | 108.73(19) |
| F7_1-C4_1-C1_1 | 110.73(16) | C4_4-C1_4-C2_4 | 110.13(19) |
| F8_1-C4_1-C1_1 | 112.09(16) | C3_4-C1_4-C2_4 | 109.58(17) |
| C1_2-O1_2-AI01 | 151.33(13) | F1_4-C2_4-F3_4 | 107.6(2)   |
| O1_2-C1_2-C3_2 | 107.61(15) | F1_4-C2_4-F2_4 | 108.4(2)   |
| O1_2-C1_2-C2_2 | 110.04(16) | F3_4-C2_4-F2_4 | 107.9(2)   |
| C3_2-C1_2-C2_2 | 109.33(16) | F1_4-C2_4-C1_4 | 110.5(2)   |
| O1_2-C1_2-C4_2 | 110.61(16) | F3_4-C2_4-C1_4 | 110.4(2)   |
| C3_2-C1_2-C4_2 | 110.08(16) | F2_4-C2_4-C1_4 | 111.9(2)   |
| C2_2-C1_2-C4_2 | 109.15(16) | F4_4-C3_4-F5_4 | 107.84(17) |
| F1_2-C2_2-F3_2 | 107.96(17) | F4_4-C3_4-F6_4 | 107.28(17) |
| F1_2-C2_2-F2_2 | 108.03(17) | F5_4-C3_4-F6_4 | 106.76(17) |
| F3_2-C2_2-F2_2 | 107.41(17) | F4_4-C3_4-C1_4 | 110.53(17) |
| F1_2-C2_2-C1_2 | 110.80(17) | F5_4-C3_4-C1_4 | 112.01(17) |
| F3_2-C2_2-C1_2 | 110.42(17) | F6_4-C3_4-C1_4 | 112.17(16) |
| F2_2-C2_2-C1_2 | 112.07(17) | F9_4-C4_4-F8_4 | 108.32(19) |
| F4_2-C3_2-F5_2 | 107.76(16) | F9_4-C4_4-F7_4 | 107.1(2)   |
| F4_2-C3_2-F6_2 | 107.19(17) | F8_4-C4_4-F7_4 | 108.1(2)   |
| F5_2-C3_2-F6_2 | 107.26(17) | F9_4-C4_4-C1_4 | 110.72(18) |
| F4_2-C3_2-C1_2 | 111.34(17) | F8_4-C4_4-C1_4 | 112.4(2)   |
| F5_2-C3_2-C1_2 | 110.87(16) | F7_4-C4_4-C1_4 | 110.08(18) |
| F6_2-C3_2-C1_2 | 112.19(16) | C1_5-O1_5-AI02 | 167.8(2)   |
| F9_2-C4_2-F8_2 | 108.49(17) | O1_5-C1_5-C2_5 | 110.1(2)   |
| F9_2-C4_2-F7_2 | 107.46(17) | O1_5-C1_5-C3_5 | 108.1(2)   |
| F8_2-C4_2-F7_2 | 107.40(17) | C2_5-C1_5-C3_5 | 109.7(2)   |
| F9_2-C4_2-C1_2 | 110.76(16) | O1_5-C1_5-C4_5 | 109.9(2)   |
| F8_2-C4_2-C1_2 | 112.14(17) | C2_5-C1_5-C4_5 | 109.8(2)   |
| F7_2-C4_2-C1_2 | 110.41(16) | C3_5-C1_5-C4_5 | 109.3(2)   |
| C1_3-O1_3-AI01 | 162.67(15) | F2_5-C2_5-F1_5 | 107.6(3)   |
| O1_3-C1_3-C3_3 | 108.51(18) | F2_5-C2_5-F3_5 | 107.6(3)   |
| O1_3-C1_3-C4_3 | 109.43(18) | F1_5-C2_5-F3_5 | 107.1(2)   |
| C3_3-C1_3-C4_3 | 109.12(17) | F2_5-C2_5-C1_5 | 112.9(3)   |
| O1_3-C1_3-C2_3 | 110.81(16) | F1_5-C2_5-C1_5 | 110.7(2)   |
| C3_3-C1_3-C2_3 | 109.41(17) | F3_5-C2_5-C1_5 | 110.6(2)   |
| C4_3-C1_3-C2_3 | 109.53(17) | F4_5-C3_5-F5_5 | 108.3(2)   |
| F1_3-C2_3-F3_3 | 107.08(18) | F4_5-C3_5-F6_5 | 107.7(3)   |
| F1_3-C2_3-F2_3 | 107.63(18) | F5_5-C3_5-F6_5 | 107.3(3)   |
| F3_3-C2_3-F2_3 | 107.88(19) | F4_5-C3_5-C1_5 | 111.4(2)   |
| F1_3-C2_3-C1_3 | 111.05(18) | F5_5-C3_5-C1_5 | 110.2(2)   |
| F3_3-C2_3-C1_3 | 110.37(18) | F6_5-C3_5-C1_5 | 111.8(3)   |
| F2_3-C2_3-C1_3 | 112.60(17) | F7_5-C4_5-F9_5 | 108.0(2)   |
| F4_3-C3_3-F5_3 | 107.55(19) | F7_5-C4_5-F8_5 | 107.1(3)   |
| F4_3-C3_3-F6_3 | 107.44(19) | F9_5-C4_5-F8_5 | 108.1(3)   |
| F5_3-C3_3-F6_3 | 107.36(19) | F7_5-C4_5-C1_5 | 111.2(2)   |
| F4_3-C3_3-C1_3 | 111.61(19) | F9_5-C4_5-C1_5 | 110.6(3)   |

|                |            |
|----------------|------------|
| F8_5-C4_5-C1_5 | 111.7(3)   |
| C1_6-O1_6-AlO2 | 145.67(14) |
| O1_6-C1_6-C2_6 | 109.53(17) |
| O1_6-C1_6-C3_6 | 111.13(17) |
| C2_6-C1_6-C3_6 | 109.55(19) |
| O1_6-C1_6-C4_6 | 107.69(17) |
| C2_6-C1_6-C4_6 | 109.61(17) |
| C3_6-C1_6-C4_6 | 109.29(18) |
| F1_6-C2_6-F3_6 | 107.6(2)   |
| F1_6-C2_6-F2_6 | 107.50(19) |
| F3_6-C2_6-F2_6 | 108.0(2)   |
| F1_6-C2_6-C1_6 | 111.0(2)   |
| F3_6-C2_6-C1_6 | 110.16(18) |
| F2_6-C2_6-C1_6 | 112.43(19) |
| F4_6-C3_6-F6_6 | 108.1(2)   |
| F4_6-C3_6-F5_6 | 107.19(19) |
| F6_6-C3_6-F5_6 | 108.3(2)   |
| F4_6-C3_6-C1_6 | 110.14(19) |
| F6_6-C3_6-C1_6 | 112.05(19) |
| F5_6-C3_6-C1_6 | 110.85(19) |
| F9_6-C4_6-F7_6 | 107.79(19) |
| F9_6-C4_6-F8_6 | 106.83(18) |
| F7_6-C4_6-F8_6 | 107.43(18) |
| F9_6-C4_6-C1_6 | 111.60(18) |
| F7_6-C4_6-C1_6 | 111.02(18) |
| F8_6-C4_6-C1_6 | 111.94(18) |
| C1_7-O1_7-AlO2 | 158.3(14)  |
| O1_7-C1_7-C4_7 | 110.1(13)  |
| O1_7-C1_7-C3_7 | 107.9(13)  |
| C4_7-C1_7-C3_7 | 109.4(12)  |
| O1_7-C1_7-C2_7 | 107.9(13)  |
| C4_7-C1_7-C2_7 | 110.4(12)  |
| C3_7-C1_7-C2_7 | 111.1(12)  |
| F2_7-C2_7-F1_7 | 110(2)     |
| F2_7-C2_7-F3_7 | 107.5(19)  |
| F1_7-C2_7-F3_7 | 107.2(17)  |
| F2_7-C2_7-C1_7 | 111.4(19)  |
| F1_7-C2_7-C1_7 | 111.3(16)  |
| F3_7-C2_7-C1_7 | 109.6(13)  |
| F5_7-C3_7-F4_7 | 108.0(16)  |
| F5_7-C3_7-F6_7 | 109(2)     |
| F4_7-C3_7-F6_7 | 109(2)     |
| F5_7-C3_7-C1_7 | 110.7(13)  |
| F4_7-C3_7-C1_7 | 109.8(13)  |
| F6_7-C3_7-C1_7 | 110.9(19)  |
| F7_7-C4_7-F9_7 | 107.7(17)  |
| F7_7-C4_7-F8_7 | 106.5(19)  |
| F9_7-C4_7-F8_7 | 106.7(19)  |
| F7_7-C4_7-C1_7 | 111.3(13)  |
| F9_7-C4_7-C1_7 | 113.1(14)  |
| F8_7-C4_7-C1_7 | 111.2(18)  |

Symmetry transformations used to generate equivalent atoms:

#1: 1-X, 1-Y, 1-Z; #2: -X, 1-Y, 1-Z;

Table S7: Atomic coordinates and  $U_{eq}$  [ $\text{\AA}^2$ ] for  $[\text{Fe}(\text{CO})_5\text{oDFB}][\text{Al}(\text{OR}^F)_4]$ .

| Atom | x           | y           | z           | $U_{eq}$   |
|------|-------------|-------------|-------------|------------|
| Fe1  | 0.24996(3)  | 0.91845(3)  | 0.39989(2)  | 0.03278(9) |
| Al1  | 0.000000    | 0.30072(15) | 0.250000    | 0.0268(3)  |
| Al2  | 0.500000    | 0.30089(15) | 0.250000    | 0.0263(3)  |
| O1   | 0.11404(15) | 0.9370(4)   | 0.4179(3)   | 0.0582(11) |
| O2   | 0.2501(2)   | 0.6585(3)   | 0.48027(14) | 0.0673(6)  |
| O3   | 0.38802(16) | 0.9374(4)   | 0.4197(2)   | 0.0557(10) |
| O4   | 0.2498(2)   | 1.2062(2)   | 0.34909(13) | 0.0548(5)  |
| O5   | 0.2506(2)   | 0.7965(2)   | 0.25615(11) | 0.0592(6)  |
| C1   | 0.1646(2)   | 0.9298(4)   | 0.4115(3)   | 0.0428(11) |
| C2   | 0.2486(3)   | 0.7556(3)   | 0.45050(14) | 0.0442(5)  |
| C3   | 0.3362(2)   | 0.9296(4)   | 0.4111(3)   | 0.0404(10) |
| C4   | 0.2485(2)   | 1.0984(3)   | 0.36807(14) | 0.0399(5)  |
| C5   | 0.2502(3)   | 0.8388(3)   | 0.30941(13) | 0.0420(5)  |
| C1_1 | 0.2030(8)   | 1.2341(19)  | 0.5387(10)  | 0.047(3)   |
| C2_1 | 0.2642(8)   | 1.2229(17)  | 0.5490(9)   | 0.051(3)   |
| C3_1 | 0.2952(9)   | 1.315(2)    | 0.5891(11)  | 0.057(3)   |
| H3_1 | 0.338145    | 1.305844    | 0.597701    | 0.068      |
| C4_1 | 0.2605(10)  | 1.425(2)    | 0.6175(12)  | 0.052(3)   |
| H4_1 | 0.280800    | 1.499160    | 0.639355    | 0.062      |
| C5_1 | 0.1999(10)  | 1.422(2)    | 0.6130(12)  | 0.051(3)   |
| H5_1 | 0.176276    | 1.481403    | 0.641537    | 0.061      |
| C6_1 | 0.1697(8)   | 1.3353(18)  | 0.5683(10)  | 0.046(3)   |
| H6_1 | 0.127021    | 1.346101    | 0.558406    | 0.056      |
| F1_1 | 0.1750(10)  | 1.141(2)    | 0.4955(11)  | 0.0775(14) |
| F2_1 | 0.2902(9)   | 1.1134(17)  | 0.5189(8)   | 0.0698(14) |
| O1_2 | 0.0677(6)   | 0.2363(13)  | 0.2025(7)   | 0.0336(19) |
| C1_2 | 0.0897(6)   | 0.1277(17)  | 0.1693(9)   | 0.0333(14) |
| C2_2 | 0.0440(5)   | 0.0626(12)  | 0.1197(6)   | 0.0461(16) |
| F1_2 | -0.0101(4)  | 0.0283(10)  | 0.1559(5)   | 0.047(2)   |
| F2_2 | 0.0610(5)   | -0.0528(14) | 0.0919(7)   | 0.051(2)   |
| F3_2 | 0.0226(6)   | 0.1453(15)  | 0.0717(7)   | 0.070(3)   |
| C3_2 | 0.1450(5)   | 0.1794(11)  | 0.1282(7)   | 0.0573(18) |
| F4_2 | 0.1907(6)   | 0.2284(13)  | 0.1643(7)   | 0.070(2)   |
| F5_2 | 0.1420(5)   | 0.2998(10)  | 0.1006(7)   | 0.077(2)   |
| F6_2 | 0.1745(5)   | 0.0793(10)  | 0.0929(7)   | 0.068(3)   |
| C4_2 | 0.1220(5)   | 0.0119(12)  | 0.2074(6)   | 0.0438(17) |
| F7_2 | 0.1573(6)   | 0.0529(13)  | 0.2588(5)   | 0.046(2)   |
| F8_2 | 0.1619(7)   | -0.0458(14) | 0.1603(7)   | 0.072(3)   |
| F9_2 | 0.0910(5)   | -0.0891(11) | 0.2310(6)   | 0.056(2)   |
| O1_3 | 0.0278(3)   | 0.4095(9)   | 0.3151(5)   | 0.0392(19) |
| C1_3 | 0.0754(3)   | 0.4675(7)   | 0.3474(4)   | 0.0316(17) |
| C2_3 | 0.1275(4)   | 0.5173(8)   | 0.2988(4)   | 0.0491(19) |
| F1_3 | 0.1638(2)   | 0.4063(6)   | 0.2809(3)   | 0.0412(12) |
| F2_3 | 0.1643(5)   | 0.6096(8)   | 0.3294(5)   | 0.101(4)   |
| F3_3 | 0.1100(5)   | 0.5853(9)   | 0.2433(4)   | 0.078(3)   |
| C3_3 | 0.0517(4)   | 0.5977(7)   | 0.3863(4)   | 0.051(2)   |
| F4_3 | -0.0032(3)  | 0.5707(6)   | 0.4151(4)   | 0.062(2)   |
| F5_3 | 0.0447(5)   | 0.6984(7)   | 0.3425(5)   | 0.103(3)   |
| F6_3 | 0.0891(3)   | 0.6334(6)   | 0.4390(3)   | 0.0540(15) |
| C4_3 | 0.1031(3)   | 0.3712(7)   | 0.4017(3)   | 0.0352(14) |
| F7_3 | 0.0660(3)   | 0.3565(8)   | 0.4560(3)   | 0.0631(18) |
| F8_3 | 0.1602(3)   | 0.4036(8)   | 0.4256(4)   | 0.067(2)   |
| F9_3 | 0.1124(2)   | 0.2473(5)   | 0.3710(3)   | 0.0430(11) |
| O1_4 | 0.4390(6)   | 0.2026(8)   | 0.2183(5)   | 0.042(2)   |

|       |            |             |            |            |
|-------|------------|-------------|------------|------------|
| C1_4  | 0.4131(4)  | 0.1308(9)   | 0.1661(5)  | 0.0358(14) |
| C2_4  | 0.3459(4)  | 0.0981(9)   | 0.1839(5)  | 0.0700(19) |
| F1_4  | 0.3377(4)  | 0.0624(9)   | 0.2512(4)  | 0.090(2)   |
| F2_4  | 0.3221(3)  | -0.0076(9)  | 0.1504(5)  | 0.081(2)   |
| F3_4  | 0.3089(3)  | 0.2002(9)   | 0.1787(6)  | 0.098(2)   |
| C3_4  | 0.4102(5)  | 0.2206(11)  | 0.0981(6)  | 0.070(2)   |
| F4_4  | 0.4618(5)  | 0.2096(10)  | 0.0620(5)  | 0.086(3)   |
| F5_4  | 0.3849(8)  | 0.3412(11)  | 0.1138(8)  | 0.139(6)   |
| F6_4  | 0.3669(6)  | 0.1617(14)  | 0.0565(6)  | 0.123(4)   |
| C4_4  | 0.4518(4)  | 0.0036(10)  | 0.1530(6)  | 0.072(2)   |
| F7_4  | 0.5129(3)  | 0.0561(12)  | 0.1484(7)  | 0.112(4)   |
| F8_4  | 0.4421(5)  | -0.0520(10) | 0.0891(6)  | 0.099(4)   |
| F9_4  | 0.4420(7)  | -0.0769(12) | 0.2081(8)  | 0.133(5)   |
| O1_5  | 0.4654(5)  | 0.4310(10)  | 0.3011(5)  | 0.0322(15) |
| C1_5  | 0.4217(5)  | 0.4717(10)  | 0.3477(5)  | 0.0306(13) |
| C2_5  | 0.4506(5)  | 0.5932(9)   | 0.3877(5)  | 0.0390(16) |
| F1_5  | 0.5047(5)  | 0.5639(12)  | 0.4159(7)  | 0.052(2)   |
| F2_5  | 0.4103(7)  | 0.6360(12)  | 0.4375(8)  | 0.055(3)   |
| F3_5  | 0.4592(6)  | 0.7016(9)   | 0.3490(5)  | 0.062(2)   |
| C3_5  | 0.3666(4)  | 0.5134(10)  | 0.3005(6)  | 0.0382(15) |
| F4_5  | 0.3321(7)  | 0.4079(13)  | 0.2769(7)  | 0.042(2)   |
| F5_5  | 0.3821(5)  | 0.5815(12)  | 0.2430(6)  | 0.062(2)   |
| F6_5  | 0.3276(5)  | 0.5996(9)   | 0.3340(5)  | 0.0556(19) |
| C4_5  | 0.3977(4)  | 0.3635(8)   | 0.4005(4)  | 0.0280(13) |
| F7_5  | 0.3963(5)  | 0.2415(8)   | 0.3711(6)  | 0.045(2)   |
| F8_5  | 0.3440(4)  | 0.4038(10)  | 0.4275(4)  | 0.0475(18) |
| F9_5  | 0.4314(5)  | 0.3437(11)  | 0.4589(5)  | 0.048(2)   |
| O1_11 | 0.5278(4)  | 0.3918(8)   | 0.1814(3)  | 0.0352(13) |
| C1_11 | 0.5716(4)  | 0.4775(10)  | 0.1579(5)  | 0.0519(17) |
| C2_11 | 0.5488(6)  | 0.5262(13)  | 0.0877(5)  | 0.098(3)   |
| F1_11 | 0.5538(6)  | 0.4149(11)  | 0.0421(5)  | 0.113(4)   |
| F2_11 | 0.5817(8)  | 0.6282(15)  | 0.0595(9)  | 0.125(5)   |
| F3_11 | 0.4909(6)  | 0.5665(18)  | 0.0863(9)  | 0.134(5)   |
| C3_11 | 0.5769(5)  | 0.6049(9)   | 0.2060(5)  | 0.082(2)   |
| F4_11 | 0.5879(4)  | 0.5770(11)  | 0.2703(5)  | 0.066(2)   |
| F5_11 | 0.5319(7)  | 0.6894(10)  | 0.1863(10) | 0.168(6)   |
| F6_11 | 0.6283(7)  | 0.6772(16)  | 0.1882(7)  | 0.165(6)   |
| C4_11 | 0.6337(4)  | 0.3975(9)   | 0.1516(4)  | 0.0636(17) |
| F7_11 | 0.6592(6)  | 0.4087(15)  | 0.2161(6)  | 0.073(3)   |
| F8_11 | 0.6696(4)  | 0.4516(12)  | 0.1029(6)  | 0.124(4)   |
| F9_11 | 0.6216(5)  | 0.2669(10)  | 0.1265(7)  | 0.082(3)   |
| O1_9  | 0.5649(7)  | 0.2283(15)  | 0.2925(8)  | 0.0296(12) |
| C1_9  | 0.5846(5)  | 0.1267(12)  | 0.3340(6)  | 0.0322(11) |
| C2_9  | 0.6122(6)  | 0.0069(11)  | 0.2961(6)  | 0.0480(15) |
| F1_9  | 0.5733(7)  | -0.0989(13) | 0.2848(10) | 0.064(2)   |
| F2_9  | 0.6480(7)  | -0.0753(11) | 0.3322(7)  | 0.068(2)   |
| F3_9  | 0.6285(7)  | 0.0378(13)  | 0.2345(6)  | 0.063(2)   |
| C3_9  | 0.6320(5)  | 0.2036(11)  | 0.3799(6)  | 0.0423(14) |
| F4_9  | 0.6007(7)  | 0.3221(13)  | 0.4008(10) | 0.065(3)   |
| F5_9  | 0.6748(4)  | 0.2601(10)  | 0.3513(6)  | 0.0538(18) |
| F6_9  | 0.6602(5)  | 0.1166(13)  | 0.4264(6)  | 0.063(2)   |
| C4_9  | 0.5351(5)  | 0.0651(12)  | 0.3826(6)  | 0.0504(15) |
| F7_9  | 0.5004(7)  | 0.1454(11)  | 0.4110(8)  | 0.080(3)   |
| F8_9  | 0.5645(8)  | -0.0168(16) | 0.4284(7)  | 0.060(3)   |
| F9_9  | 0.4986(7)  | -0.0086(16) | 0.3349(9)  | 0.070(3)   |
| O1_7  | -0.0454(5) | 0.3859(10)  | 0.1949(6)  | 0.059(2)   |
| C1_7  | -0.0692(4) | 0.4913(10)  | 0.1605(5)  | 0.0470(17) |

|       |            |             |            |            |
|-------|------------|-------------|------------|------------|
| C2_7  | -0.0743(4) | 0.6199(8)   | 0.2103(5)  | 0.0646(18) |
| F1_7  | -0.0207(4) | 0.6809(7)   | 0.2158(5)  | 0.092(2)   |
| F2_7  | -0.1154(5) | 0.7055(9)   | 0.1860(6)  | 0.111(3)   |
| F3_7  | -0.0859(4) | 0.5690(11)  | 0.2708(5)  | 0.065(2)   |
| C3_7  | -0.1345(5) | 0.4674(12)  | 0.1344(6)  | 0.095(2)   |
| F4_7  | -0.1333(6) | 0.3414(12)  | 0.1058(8)  | 0.129(4)   |
| F5_7  | -0.1747(4) | 0.4886(19)  | 0.1886(7)  | 0.152(4)   |
| F6_7  | -0.1479(6) | 0.5613(13)  | 0.0842(6)  | 0.157(4)   |
| C4_7  | -0.0271(6) | 0.5333(11)  | 0.1002(6)  | 0.100(3)   |
| F7_7  | -0.0440(7) | 0.4311(10)  | 0.0471(4)  | 0.131(4)   |
| F8_7  | -0.0397(8) | 0.6539(9)   | 0.0777(5)  | 0.148(5)   |
| F9_7  | 0.0326(4)  | 0.5228(10)  | 0.1182(6)  | 0.128(3)   |
| O1_8  | -0.0607(3) | 0.2031(7)   | 0.2802(4)  | 0.0326(13) |
| C1_8  | -0.0849(4) | 0.1294(11)  | 0.3322(6)  | 0.0354(13) |
| C2_8  | -0.1526(4) | 0.1062(11)  | 0.3011(6)  | 0.078(2)   |
| F1_8  | -0.1874(4) | 0.1985(12)  | 0.3159(7)  | 0.117(3)   |
| F2_8  | -0.1811(3) | 0.0144(10)  | 0.3349(6)  | 0.110(3)   |
| F3_8  | -0.1406(6) | 0.0792(12)  | 0.2353(5)  | 0.111(3)   |
| C3_8  | -0.0579(4) | -0.0134(10) | 0.3457(6)  | 0.0713(19) |
| F4_8  | -0.0029(4) | -0.0258(11) | 0.3683(8)  | 0.135(4)   |
| F5_8  | -0.0667(5) | -0.0943(8)  | 0.2948(6)  | 0.099(3)   |
| F6_8  | -0.0903(6) | -0.0695(10) | 0.3998(7)  | 0.141(4)   |
| C4_8  | -0.0892(4) | 0.2132(8)   | 0.3998(4)  | 0.0523(15) |
| F7_8  | -0.0385(4) | 0.2079(11)  | 0.4384(5)  | 0.078(2)   |
| F8_8  | -0.1368(3) | 0.1673(9)   | 0.4411(4)  | 0.0658(18) |
| F9_8  | -0.0961(6) | 0.3409(8)   | 0.3910(4)  | 0.068(2)   |
| O1_6  | 0.5299(4)  | 0.1715(12)  | 0.2956(6)  | 0.0296(12) |
| C1_6  | 0.5809(5)  | 0.1252(13)  | 0.3306(6)  | 0.0336(12) |
| C2_6  | 0.5720(6)  | -0.0226(13) | 0.3559(7)  | 0.0510(16) |
| F1_6  | 0.5959(9)  | -0.1066(14) | 0.3086(9)  | 0.075(3)   |
| F2_6  | 0.6019(6)  | -0.0499(14) | 0.4162(7)  | 0.066(2)   |
| F3_6  | 0.5115(4)  | -0.0456(11) | 0.3715(7)  | 0.060(2)   |
| C3_6  | 0.5894(7)  | 0.2078(15)  | 0.3985(7)  | 0.0452(16) |
| F4_6  | 0.5847(7)  | 0.3403(13)  | 0.3840(8)  | 0.046(2)   |
| F5_6  | 0.5491(7)  | 0.1642(18)  | 0.4471(8)  | 0.062(3)   |
| F6_6  | 0.6483(6)  | 0.1966(18)  | 0.4221(8)  | 0.056(3)   |
| C4_6  | 0.6370(4)  | 0.1406(11)  | 0.2825(5)  | 0.0347(13) |
| F7_6  | 0.6597(4)  | 0.2657(10)  | 0.2787(5)  | 0.0469(18) |
| F8_6  | 0.6865(3)  | 0.0726(10)  | 0.2999(5)  | 0.0449(17) |
| F9_6  | 0.6241(4)  | 0.1016(13)  | 0.2183(5)  | 0.045(2)   |
| O1_12 | 0.4479(5)  | 0.3750(13)  | 0.3014(7)  | 0.0149(19) |
| C1_12 | 0.4319(6)  | 0.4813(14)  | 0.3441(7)  | 0.0300(16) |
| C2_12 | 0.4030(6)  | 0.4269(14)  | 0.4121(7)  | 0.0418(19) |
| F1_12 | 0.4478(8)  | 0.361(2)    | 0.4465(11) | 0.049(3)   |
| F2_12 | 0.3672(7)  | 0.5240(15)  | 0.4414(8)  | 0.059(3)   |
| F3_12 | 0.3618(6)  | 0.3333(15)  | 0.3958(7)  | 0.043(2)   |
| C3_12 | 0.3786(6)  | 0.5441(16)  | 0.3023(8)  | 0.038(2)   |
| F4_12 | 0.4007(9)  | 0.548(3)    | 0.2385(8)  | 0.045(3)   |
| F5_12 | 0.3247(5)  | 0.4790(13)  | 0.3038(8)  | 0.041(2)   |
| F6_12 | 0.3559(9)  | 0.6580(18)  | 0.3297(12) | 0.060(3)   |
| C4_12 | 0.4849(5)  | 0.5805(12)  | 0.3605(7)  | 0.0351(18) |
| F7_12 | 0.5017(8)  | 0.6539(13)  | 0.3033(8)  | 0.057(3)   |
| F8_12 | 0.4759(5)  | 0.6569(12)  | 0.4169(6)  | 0.035(2)   |
| F9_12 | 0.5355(4)  | 0.5029(11)  | 0.3760(6)  | 0.032(2)   |
| O1_10 | 0.0305(5)  | 0.1743(9)   | 0.2033(5)  | 0.0236(13) |
| C1_10 | 0.0813(6)  | 0.1245(12)  | 0.1676(6)  | 0.0312(14) |
| C2_10 | 0.1294(6)  | 0.2264(14)  | 0.1427(7)  | 0.0590(19) |

|       |            |             |            |            |
|-------|------------|-------------|------------|------------|
| F1_10 | 0.1610(5)  | 0.2685(12)  | 0.2040(7)  | 0.066(2)   |
| F2_10 | 0.1546(7)  | 0.1942(19)  | 0.0821(8)  | 0.078(3)   |
| F3_10 | 0.0979(10) | 0.3476(16)  | 0.1279(11) | 0.077(3)   |
| C3_10 | 0.0445(5)  | 0.1103(11)  | 0.0984(5)  | 0.0355(16) |
| F4_10 | -0.0140(4) | 0.1177(12)  | 0.1197(6)  | 0.054(2)   |
| F5_10 | 0.0642(7)  | 0.2032(14)  | 0.0534(6)  | 0.064(3)   |
| F6_10 | 0.0492(6)  | -0.0115(12) | 0.0690(7)  | 0.052(2)   |
| C4_10 | 0.0842(5)  | -0.0111(11) | 0.2051(5)  | 0.0430(16) |
| F7_10 | 0.0246(5)  | -0.0584(10) | 0.2099(6)  | 0.058(2)   |
| F8_10 | 0.1233(6)  | -0.1042(11) | 0.1773(6)  | 0.058(3)   |
| F9_10 | 0.0943(6)  | 0.0000(11)  | 0.2727(4)  | 0.062(2)   |
| C1_13 | 0.2837(3)  | 1.2464(6)   | 0.5469(3)  | 0.0480(12) |
| C2_13 | 0.2205(3)  | 1.2446(6)   | 0.5486(3)  | 0.0487(12) |
| C3_13 | 0.1888(3)  | 1.3387(7)   | 0.5868(4)  | 0.0578(15) |
| H3_13 | 0.144985   | 1.340462    | 0.586853   | 0.069      |
| C4_13 | 0.2230(4)  | 1.4331(7)   | 0.6263(4)  | 0.0607(17) |
| H4_13 | 0.202305   | 1.495884    | 0.655705   | 0.073      |
| C5_13 | 0.2842(4)  | 1.4343(6)   | 0.6224(4)  | 0.0559(15) |
| H5_13 | 0.306366   | 1.503171    | 0.646507   | 0.067      |
| C6_13 | 0.3161(4)  | 1.3408(8)   | 0.5853(4)  | 0.0617(17) |
| H6_13 | 0.359927   | 1.340282    | 0.585669   | 0.074      |
| F1_13 | 0.3149(3)  | 1.1568(5)   | 0.5064(3)  | 0.0698(14) |
| F2_13 | 0.1916(3)  | 1.1485(6)   | 0.5106(3)  | 0.0775(14) |

$U_{eq}$  is defined as 1/3 of the trace of the orthogonalized  $U_{ij}$  tensor.

Table 8: Bond lengths and angles for  $[\text{Fe}(\text{CO})_5\text{oDFB}][\text{Al}(\text{OR}^{\text{F}})_4]$ .

| Atom-Atom | Length [Å] |           |           |
|-----------|------------|-----------|-----------|
| Fe1-C1    | 1.867(5)   | C2_1-C3_1 | 1.364(13) |
| Fe1-C4    | 1.872(3)   | C3_1-C4_1 | 1.426(14) |
| Fe1-C2    | 1.873(3)   | C3_1-H3_1 | 0.9500    |
| Fe1-C3    | 1.885(5)   | C4_1-C5_1 | 1.316(16) |
| Fe1-C5    | 1.907(3)   | C4_1-H4_1 | 0.9500    |
| Fe1-F2_1  | 3.109(16)  | C5_1-C6_1 | 1.376(14) |
| Fe1-F1_1  | 3.29(2)    | C5_1-H5_1 | 0.9500    |
| Fe1-F2_13 | 3.351(6)   | C6_1-H6_1 | 0.9500    |
| Fe1-F1_13 | 3.415(6)   | O1_2-C1_2 | 1.33(2)   |
| Al1-O1_10 | 1.669(8)   | C1_2-C2_2 | 1.518(15) |
| Al1-O1_7  | 1.671(8)   | C1_2-C3_2 | 1.522(16) |
| Al1-O1_8  | 1.727(7)   | C1_2-C4_2 | 1.524(15) |
| Al1-O1_3  | 1.753(7)   | C2_2-F2_2 | 1.307(12) |
| Al1-O1_2  | 1.840(12)  | C2_2-F3_2 | 1.314(12) |
| Al2-O1_12 | 1.667(11)  | C2_2-F1_2 | 1.405(12) |
| Al2-O1_6  | 1.674(11)  | C3_2-F5_2 | 1.298(12) |
| Al2-O1_11 | 1.702(6)   | C3_2-F4_2 | 1.301(13) |
| Al2-O1_4  | 1.747(9)   | C3_2-F6_2 | 1.354(10) |
| Al2-O1_9  | 1.776(13)  | F4_2-F5_2 | 1.76(2)   |
| Al2-O1_5  | 1.779(8)   | C4_2-F9_2 | 1.282(12) |
| O1-C1     | 1.104(6)   | C4_2-F7_2 | 1.312(12) |
| O2-C2     | 1.113(4)   | C4_2-F8_2 | 1.374(12) |
| O3-C3     | 1.136(6)   | O1_3-C1_3 | 1.333(9)  |
| O4-C4     | 1.120(3)   | C1_3-C4_3 | 1.531(9)  |
| O5-C5     | 1.105(3)   | C1_3-C2_3 | 1.545(9)  |
| C1_1-C2_1 | 1.343(15)  | C1_3-C3_3 | 1.568(8)  |
| C1_1-C6_1 | 1.354(13)  | C2_3-F3_3 | 1.316(9)  |
| C1_1-F1_1 | 1.376(12)  | C2_3-F2_3 | 1.343(9)  |
| C2_1-F2_1 | 1.346(12)  | C2_3-F1_3 | 1.388(9)  |
|           |            | C3_3-F5_3 | 1.308(9)  |

|             |           |             |           |
|-------------|-----------|-------------|-----------|
| C3_3-F4_3   | 1.339(9)  | O1_7-C1_7   | 1.332(10) |
| C3_3-F6_3   | 1.345(9)  | C1_7-C3_7   | 1.520(11) |
| C4_3-F7_3   | 1.324(7)  | C1_7-C4_7   | 1.532(11) |
| C4_3-F8_3   | 1.357(8)  | C1_7-C2_7   | 1.589(10) |
| C4_3-F9_3   | 1.368(8)  | C2_7-F3_7   | 1.292(10) |
| O1_4-C1_4   | 1.349(9)  | C2_7-F1_7   | 1.311(10) |
| C1_4-C4_4   | 1.525(10) | C2_7-F2_7   | 1.311(9)  |
| C1_4-C2_4   | 1.529(10) | C3_7-F4_7   | 1.354(11) |
| C1_4-C3_4   | 1.579(11) | C3_7-F6_7   | 1.366(11) |
| C2_4-F3_4   | 1.289(10) | C3_7-F5_7   | 1.373(11) |
| C2_4-F2_4   | 1.327(8)  | C4_7-F8_7   | 1.291(11) |
| C2_4-F1_4   | 1.352(10) | C4_7-F9_7   | 1.343(11) |
| C3_4-F4_4   | 1.320(10) | C4_7-F7_7   | 1.477(11) |
| C3_4-F5_4   | 1.339(11) | O1_8-C1_8   | 1.343(15) |
| C3_4-F6_4   | 1.362(11) | C1_8-C4_8   | 1.540(11) |
| C4_4-F9_4   | 1.339(11) | C1_8-C3_8   | 1.542(12) |
| C4_4-F8_4   | 1.362(10) | C1_8-C2_8   | 1.601(11) |
| C4_4-F7_4   | 1.424(10) | C2_8-F1_8   | 1.213(11) |
| O1_5-C1_5   | 1.362(11) | C2_8-F2_8   | 1.271(11) |
| C1_5-C2_5   | 1.551(10) | C2_8-F3_8   | 1.319(11) |
| C1_5-C3_5   | 1.556(10) | C3_8-F4_8   | 1.274(10) |
| C1_5-C4_5   | 1.559(10) | C3_8-F5_8   | 1.275(11) |
| C2_5-F3_5   | 1.313(11) | C3_8-F6_8   | 1.370(11) |
| C2_5-F1_5   | 1.323(11) | C4_8-F9_8   | 1.276(10) |
| C2_5-F2_5   | 1.362(10) | C4_8-F7_8   | 1.326(10) |
| C3_5-F5_5   | 1.335(10) | C4_8-F8_8   | 1.378(8)  |
| C3_5-F4_5   | 1.356(11) | O1_6-C1_6   | 1.371(12) |
| C3_5-F6_5   | 1.357(10) | C1_6-C4_6   | 1.534(11) |
| C4_5-F7_5   | 1.325(9)  | C1_6-C2_6   | 1.544(12) |
| C4_5-F8_5   | 1.335(9)  | C1_6-C3_6   | 1.548(12) |
| C4_5-F9_5   | 1.353(10) | C2_6-F1_6   | 1.333(12) |
| O1_11-C1_11 | 1.348(9)  | C2_6-F2_6   | 1.353(12) |
| C1_11-C2_11 | 1.514(10) | C2_6-F3_6   | 1.363(12) |
| C1_11-C3_11 | 1.560(11) | C3_6-F4_6   | 1.335(13) |
| C1_11-C4_11 | 1.563(10) | C3_6-F5_6   | 1.350(12) |
| C2_11-F3_11 | 1.316(12) | C3_6-F6_6   | 1.359(12) |
| C2_11-F2_11 | 1.344(11) | C4_6-F8_6   | 1.309(9)  |
| C2_11-F1_11 | 1.406(12) | C4_6-F9_6   | 1.322(10) |
| C3_11-F4_11 | 1.287(11) | C4_6-F7_6   | 1.325(11) |
| C3_11-F5_11 | 1.337(11) | O1_12-C1_12 | 1.373(13) |
| C3_11-F6_11 | 1.363(10) | C1_12-C3_12 | 1.537(12) |
| C4_11-F8_11 | 1.328(9)  | C1_12-C4_12 | 1.538(12) |
| C4_11-F7_11 | 1.361(11) | C1_12-C2_12 | 1.546(12) |
| C4_11-F9_11 | 1.396(10) | C2_12-F3_12 | 1.318(13) |
| O1_9-C1_9   | 1.347(12) | C2_12-F1_12 | 1.343(13) |
| C1_9-C2_9   | 1.507(11) | C2_12-F2_12 | 1.352(12) |
| C1_9-C4_9   | 1.547(11) | C3_12-F4_12 | 1.318(13) |
| C1_9-C3_9   | 1.549(11) | C3_12-F5_12 | 1.332(12) |
| C2_9-F3_9   | 1.272(11) | C3_12-F6_12 | 1.332(13) |
| C2_9-F2_9   | 1.317(11) | C4_12-F8_12 | 1.334(11) |
| C2_9-F1_9   | 1.356(12) | C4_12-F7_12 | 1.363(12) |
| C3_9-F5_9   | 1.213(11) | C4_12-F9_12 | 1.368(11) |
| C3_9-F6_9   | 1.380(11) | O1_10-C1_10 | 1.386(13) |
| C3_9-F4_9   | 1.406(12) | C1_10-C4_10 | 1.516(11) |
| C4_9-F7_9   | 1.219(11) | C1_10-C2_10 | 1.522(11) |
| C4_9-F8_9   | 1.352(12) | C1_10-C3_10 | 1.557(11) |
| C4_9-F9_9   | 1.412(12) | C2_10-F2_10 | 1.325(12) |





|                |           |                   |           |
|----------------|-----------|-------------------|-----------|
| F9_2-C4_2-F8_2 | 104.1(11) | O1_5-C1_5-C3_5    | 103.1(8)  |
| F7_2-C4_2-F8_2 | 104.9(10) | C2_5-C1_5-C3_5    | 113.3(8)  |
| F9_2-C4_2-C1_2 | 120.5(10) | O1_5-C1_5-C4_5    | 117.3(8)  |
| F7_2-C4_2-C1_2 | 113.6(10) | C2_5-C1_5-C4_5    | 109.7(7)  |
| F8_2-C4_2-C1_2 | 106.2(11) | C3_5-C1_5-C4_5    | 107.6(7)  |
| C1_3-O1_3-AI1  | 149.3(6)  | F3_5-C2_5-F1_5    | 106.4(10) |
| O1_3-C1_3-C4_3 | 110.9(7)  | F3_5-C2_5-F2_5    | 103.8(9)  |
| O1_3-C1_3-C2_3 | 114.8(7)  | F1_5-C2_5-F2_5    | 110.3(11) |
| C4_3-C1_3-C2_3 | 108.8(6)  | F3_5-C2_5-C1_5    | 113.7(9)  |
| O1_3-C1_3-C3_3 | 108.4(6)  | F1_5-C2_5-C1_5    | 113.1(9)  |
| C4_3-C1_3-C3_3 | 108.0(6)  | F2_5-C2_5-C1_5    | 109.1(9)  |
| C2_3-C1_3-C3_3 | 105.6(6)  | F5_5-C3_5-F4_5    | 104.2(10) |
| F3_3-C2_3-F2_3 | 100.6(8)  | F5_5-C3_5-F6_5    | 103.7(9)  |
| F3_3-C2_3-F1_3 | 111.2(7)  | F4_5-C3_5-F6_5    | 107.0(10) |
| F2_3-C2_3-F1_3 | 107.6(7)  | F5_5-C3_5-C1_5    | 114.9(9)  |
| F3_3-C2_3-C1_3 | 116.1(8)  | F4_5-C3_5-C1_5    | 114.7(9)  |
| F2_3-C2_3-C1_3 | 112.5(6)  | F6_5-C3_5-C1_5    | 111.5(9)  |
| F1_3-C2_3-C1_3 | 108.4(6)  | F7_5-C4_5-F8_5    | 114.5(9)  |
| F5_3-C3_3-F4_3 | 108.3(9)  | F7_5-C4_5-F9_5    | 103.7(8)  |
| F5_3-C3_3-F6_3 | 111.0(8)  | F8_5-C4_5-F9_5    | 100.9(8)  |
| F4_3-C3_3-F6_3 | 105.9(7)  | F7_5-C4_5-C1_5    | 110.3(8)  |
| F5_3-C3_3-C1_3 | 110.4(6)  | F8_5-C4_5-C1_5    | 110.0(7)  |
| F4_3-C3_3-C1_3 | 109.1(6)  | F9_5-C4_5-C1_5    | 117.2(8)  |
| F6_3-C3_3-C1_3 | 112.0(7)  | C1_11-O1_11-AI2   | 146.8(6)  |
| F7_3-C4_3-F8_3 | 108.2(7)  | O1_11-C1_11-C2_11 | 105.4(8)  |
| F7_3-C4_3-F9_3 | 109.4(6)  | O1_11-C1_11-C3_11 | 110.8(8)  |
| F8_3-C4_3-F9_3 | 102.7(6)  | C2_11-C1_11-C3_11 | 107.4(8)  |
| F7_3-C4_3-C1_3 | 111.5(6)  | O1_11-C1_11-C4_11 | 108.6(8)  |
| F8_3-C4_3-C1_3 | 116.2(6)  | C2_11-C1_11-C4_11 | 111.8(8)  |
| F9_3-C4_3-C1_3 | 108.3(6)  | C3_11-C1_11-C4_11 | 112.7(8)  |
| C1_4-O1_4-AI2  | 149.7(9)  | F3_11-C2_11-F2_11 | 105.8(12) |
| O1_4-C1_4-C4_4 | 108.8(8)  | F3_11-C2_11-F1_11 | 107.1(12) |
| O1_4-C1_4-C2_4 | 109.9(8)  | F2_11-C2_11-F1_11 | 106.7(11) |
| C4_4-C1_4-C2_4 | 112.8(7)  | F3_11-C2_11-C1_11 | 115.1(11) |
| O1_4-C1_4-C3_4 | 109.9(8)  | F2_11-C2_11-C1_11 | 114.9(11) |
| C4_4-C1_4-C3_4 | 110.1(7)  | F1_11-C2_11-C1_11 | 106.6(9)  |
| C2_4-C1_4-C3_4 | 105.3(7)  | F4_11-C3_11-F5_11 | 122.6(12) |
| F3_4-C2_4-F2_4 | 109.2(8)  | F4_11-C3_11-F6_11 | 101.6(10) |
| F3_4-C2_4-F1_4 | 101.2(8)  | F5_11-C3_11-F6_11 | 101.6(11) |
| F2_4-C2_4-F1_4 | 102.1(8)  | F4_11-C3_11-C1_11 | 114.3(8)  |
| F3_4-C2_4-C1_4 | 114.4(8)  | F5_11-C3_11-C1_11 | 106.1(9)  |
| F2_4-C2_4-C1_4 | 115.2(6)  | F6_11-C3_11-C1_11 | 109.2(10) |
| F1_4-C2_4-C1_4 | 113.2(8)  | F8_11-C4_11-F7_11 | 111.9(10) |
| F4_4-C3_4-F5_4 | 122.5(11) | F8_11-C4_11-F9_11 | 103.5(9)  |
| F4_4-C3_4-F6_4 | 103.8(10) | F7_11-C4_11-F9_11 | 117.8(10) |
| F5_4-C3_4-F6_4 | 103.1(12) | F8_11-C4_11-C1_11 | 110.9(8)  |
| F4_4-C3_4-C1_4 | 110.9(9)  | F7_11-C4_11-C1_11 | 103.8(8)  |
| F5_4-C3_4-C1_4 | 108.9(10) | F9_11-C4_11-C1_11 | 109.1(7)  |
| F6_4-C3_4-C1_4 | 106.0(9)  | C1_9-O1_9-AI2     | 145.2(12) |
| F9_4-C4_4-F8_4 | 116.9(11) | O1_9-C1_9-C2_9    | 114.8(11) |
| F9_4-C4_4-F7_4 | 114.3(11) | O1_9-C1_9-C4_9    | 115.3(11) |
| F8_4-C4_4-F7_4 | 103.4(9)  | C2_9-C1_9-C4_9    | 105.1(9)  |
| F9_4-C4_4-C1_4 | 105.5(9)  | O1_9-C1_9-C3_9    | 100.7(10) |
| F8_4-C4_4-C1_4 | 113.1(8)  | C2_9-C1_9-C3_9    | 113.2(10) |
| F7_4-C4_4-C1_4 | 103.0(8)  | C4_9-C1_9-C3_9    | 107.8(9)  |
| C1_5-O1_5-AI2  | 150.1(9)  | F3_9-C2_9-F2_9    | 118.2(12) |
| O1_5-C1_5-C2_5 | 105.8(8)  | F3_9-C2_9-F1_9    | 101.9(12) |

|                |           |                   |           |
|----------------|-----------|-------------------|-----------|
| F2_9-C2_9-F1_9 | 88.9(11)  | F4_8-C3_8-C1_8    | 120.0(9)  |
| F3_9-C2_9-C1_9 | 111.9(10) | F5_8-C3_8-C1_8    | 112.4(8)  |
| F2_9-C2_9-C1_9 | 117.3(10) | F6_8-C3_8-C1_8    | 107.4(9)  |
| F1_9-C2_9-C1_9 | 115.4(10) | F9_8-C4_8-F7_8    | 102.2(9)  |
| F5_9-C3_9-F6_9 | 103.7(9)  | F9_8-C4_8-F8_8    | 108.0(8)  |
| F5_9-C3_9-F4_9 | 96.9(10)  | F7_8-C4_8-F8_8    | 106.5(8)  |
| F6_9-C3_9-F4_9 | 122.7(12) | F9_8-C4_8-C1_8    | 114.9(8)  |
| F5_9-C3_9-C1_9 | 118.2(10) | F7_8-C4_8-C1_8    | 113.6(7)  |
| F6_9-C3_9-C1_9 | 111.1(9)  | F8_8-C4_8-C1_8    | 110.9(7)  |
| F4_9-C3_9-C1_9 | 104.4(10) | C1_6-O1_6-AI2     | 145.2(10) |
| F7_9-C4_9-F8_9 | 112.6(13) | O1_6-C1_6-C4_6    | 108.1(9)  |
| F7_9-C4_9-F9_9 | 106.1(13) | O1_6-C1_6-C2_6    | 111.6(10) |
| F8_9-C4_9-F9_9 | 112.5(12) | C4_6-C1_6-C2_6    | 112.4(9)  |
| F7_9-C4_9-C1_9 | 116.4(10) | O1_6-C1_6-C3_6    | 109.6(10) |
| F8_9-C4_9-C1_9 | 107.4(10) | C4_6-C1_6-C3_6    | 111.1(9)  |
| F9_9-C4_9-C1_9 | 101.3(10) | C2_6-C1_6-C3_6    | 104.0(10) |
| C1_7-O1_7-AI1  | 158.7(10) | F1_6-C2_6-F2_6    | 106.0(13) |
| O1_7-C1_7-C3_7 | 113.8(9)  | F1_6-C2_6-F3_6    | 114.9(13) |
| O1_7-C1_7-C4_7 | 110.8(9)  | F2_6-C2_6-F3_6    | 103.9(11) |
| C3_7-C1_7-C4_7 | 110.3(9)  | F1_6-C2_6-C1_6    | 108.5(11) |
| O1_7-C1_7-C2_7 | 110.3(9)  | F2_6-C2_6-C1_6    | 113.4(11) |
| C3_7-C1_7-C2_7 | 104.9(7)  | F3_6-C2_6-C1_6    | 110.1(9)  |
| C4_7-C1_7-C2_7 | 106.4(8)  | F4_6-C3_6-F5_6    | 113.8(13) |
| F3_7-C2_7-F1_7 | 106.1(9)  | F4_6-C3_6-F6_6    | 102.8(12) |
| F3_7-C2_7-F2_7 | 115.9(9)  | F5_6-C3_6-F6_6    | 110.5(13) |
| F1_7-C2_7-F2_7 | 109.7(9)  | F4_6-C3_6-C1_6    | 109.1(11) |
| F3_7-C2_7-C1_7 | 104.4(8)  | F5_6-C3_6-C1_6    | 109.9(12) |
| F1_7-C2_7-C1_7 | 110.6(7)  | F6_6-C3_6-C1_6    | 110.6(12) |
| F2_7-C2_7-C1_7 | 110.1(8)  | F8_6-C4_6-F9_6    | 105.2(9)  |
| F4_7-C3_7-F6_7 | 109.6(11) | F8_6-C4_6-F7_6    | 100.5(9)  |
| F4_7-C3_7-F5_7 | 117.3(12) | F9_6-C4_6-F7_6    | 107.2(10) |
| F6_7-C3_7-F5_7 | 107.4(11) | F8_6-C4_6-C1_6    | 116.5(10) |
| F4_7-C3_7-C1_7 | 104.9(8)  | F9_6-C4_6-C1_6    | 111.5(8)  |
| F6_7-C3_7-C1_7 | 109.1(9)  | F7_6-C4_6-C1_6    | 114.7(9)  |
| F5_7-C3_7-C1_7 | 108.4(9)  | C1_12-O1_12-AI2   | 148.9(10) |
| F8_7-C4_7-F9_7 | 111.1(12) | O1_12-C1_12-C3_12 | 100.5(10) |
| F8_7-C4_7-F7_7 | 109.8(10) | O1_12-C1_12-C4_12 | 114.7(10) |
| F9_7-C4_7-F7_7 | 111.4(11) | C3_12-C1_12-C4_12 | 114.4(10) |
| F8_7-C4_7-C1_7 | 112.0(10) | O1_12-C1_12-C2_12 | 110.2(11) |
| F9_7-C4_7-C1_7 | 111.0(9)  | C3_12-C1_12-C2_12 | 106.0(10) |
| F7_7-C4_7-C1_7 | 101.0(8)  | C4_12-C1_12-C2_12 | 110.4(10) |
| C1_8-O1_8-AI1  | 147.9(7)  | F3_12-C2_12-F1_12 | 105.6(14) |
| O1_8-C1_8-C4_8 | 111.3(8)  | F3_12-C2_12-F2_12 | 101.8(12) |
| O1_8-C1_8-C3_8 | 117.9(8)  | F1_12-C2_12-F2_12 | 123.4(15) |
| C4_8-C1_8-C3_8 | 111.6(8)  | F3_12-C2_12-C1_12 | 108.3(11) |
| O1_8-C1_8-C2_8 | 99.0(8)   | F1_12-C2_12-C1_12 | 106.9(12) |
| C4_8-C1_8-C2_8 | 109.6(7)  | F2_12-C2_12-C1_12 | 109.9(12) |
| C3_8-C1_8-C2_8 | 106.4(7)  | F4_12-C3_12-F5_12 | 110.7(15) |
| F1_8-C2_8-F2_8 | 96.3(10)  | F4_12-C3_12-F6_12 | 118.5(17) |
| F1_8-C2_8-F3_8 | 119.8(12) | F5_12-C3_12-F6_12 | 94.1(13)  |
| F2_8-C2_8-F3_8 | 116.3(10) | F4_12-C3_12-C1_12 | 103.0(11) |
| F1_8-C2_8-C1_8 | 112.1(9)  | F5_12-C3_12-C1_12 | 117.1(12) |
| F2_8-C2_8-C1_8 | 110.8(9)  | F6_12-C3_12-C1_12 | 114.1(14) |
| F3_8-C2_8-C1_8 | 101.9(8)  | F8_12-C4_12-F7_12 | 113.4(11) |
| F4_8-C3_8-F5_8 | 110.0(10) | F8_12-C4_12-F9_12 | 104.7(10) |
| F4_8-C3_8-F6_8 | 100.5(11) | F7_12-C4_12-F9_12 | 104.9(11) |
| F5_8-C3_8-F6_8 | 104.7(10) | F8_12-C4_12-C1_12 | 114.5(10) |

|                   |           |                   |           |
|-------------------|-----------|-------------------|-----------|
| F7_12-C4_12-C1_12 | 111.7(11) | F9_10-C4_10-C1_10 | 113.6(10) |
| F9_12-C4_12-C1_12 | 106.8(10) | F8_10-C4_10-C1_10 | 115.6(10) |
| C1_10-O1_10-Al1   | 147.5(9)  | F7_10-C4_10-C1_10 | 106.9(9)  |
| O1_10-C1_10-C4_10 | 96.2(8)   | F1_13-C1_13-C2_13 | 120.3(6)  |
| O1_10-C1_10-C2_10 | 117.9(11) | F1_13-C1_13-C6_13 | 119.3(6)  |
| C4_10-C1_10-C2_10 | 134.3(11) | C2_13-C1_13-C6_13 | 120.4(6)  |
| O1_10-C1_10-C3_10 | 92.7(8)   | F2_13-C2_13-C3_13 | 122.2(6)  |
| C4_10-C1_10-C3_10 | 110.3(9)  | F2_13-C2_13-C1_13 | 117.4(7)  |
| C2_10-C1_10-C3_10 | 98.1(8)   | C3_13-C2_13-C1_13 | 120.4(5)  |
| F2_10-C2_10-F3_10 | 103.0(13) | C2_13-C3_13-C4_13 | 118.1(5)  |
| F2_10-C2_10-F1_10 | 126.9(12) | C2_13-C3_13-H3_13 | 120.9     |
| F3_10-C2_10-F1_10 | 98.9(12)  | C4_13-C3_13-H3_13 | 120.9     |
| F2_10-C2_10-C1_10 | 113.7(11) | C5_13-C4_13-C3_13 | 120.1(6)  |
| F3_10-C2_10-C1_10 | 106.7(12) | C5_13-C4_13-H4_13 | 120.0     |
| F1_10-C2_10-C1_10 | 105.1(9)  | C3_13-C4_13-H4_13 | 120.0     |
| F6_10-C3_10-F5_10 | 108.5(11) | C4_13-C5_13-C6_13 | 122.2(6)  |
| F6_10-C3_10-F4_10 | 104.7(10) | C4_13-C5_13-H5_13 | 118.9     |
| F5_10-C3_10-F4_10 | 117.9(11) | C6_13-C5_13-H5_13 | 118.9     |
| F6_10-C3_10-C1_10 | 114.0(10) | C5_13-C6_13-C1_13 | 118.7(6)  |
| F5_10-C3_10-C1_10 | 109.2(10) | C5_13-C6_13-H6_13 | 120.7     |
| F4_10-C3_10-C1_10 | 102.7(8)  | C1_13-C6_13-H6_13 | 120.7     |
| F9_10-C4_10-F8_10 | 109.8(9)  | C1_13-F1_13-Fe1   | 125.7(4)  |
| F9_10-C4_10-F7_10 | 96.7(10)  | C2_13-F2_13-Fe1   | 129.9(4)  |
| F8_10-C4_10-F7_10 | 112.7(11) |                   |           |

Table S9: Atomic coordinates and  $U_{eq}$  [ $\text{\AA}^2$ ] for  $[\text{Fe}_2(\text{CO})_8\text{Br}][\text{F}-\{\text{Al}(\text{OR}^{\text{F}})_3\}_2]$ .

| Atom | x          | y           | z           | $U_{eq}$    |
|------|------------|-------------|-------------|-------------|
| Fe1  | 0.57591(5) | 0.41631(6)  | 0.75670(4)  | 0.01843(19) |
| O1   | 0.5543(3)  | 0.4394(4)   | 0.8899(2)   | 0.0304(10)  |
| C1   | 0.5592(3)  | 0.4305(4)   | 0.8390(3)   | 0.0225(13)  |
| Br2  | 0.500000   | 0.27681(6)  | 0.750000    | 0.0267(2)   |
| O2   | 0.6139(3)  | 0.6224(3)   | 0.7462(2)   | 0.0355(11)  |
| Al03 | 0.57839(9) | 0.93444(12) | 0.52138(7)  | 0.0140(3)   |
| O3   | 0.7216(2)  | 0.3324(4)   | 0.7853(2)   | 0.0321(11)  |
| C3   | 0.5950(3)  | 0.4014(5)   | 0.6738(3)   | 0.0247(13)  |
| F004 | 0.500000   | 1.000000    | 0.500000    | 0.0223(10)  |
| O4   | 0.6095(3)  | 0.3908(4)   | 0.6244(2)   | 0.0389(13)  |
| C4   | 0.6668(3)  | 0.3645(4)   | 0.7741(3)   | 0.0219(12)  |
| C2   | 0.5983(3)  | 0.5438(4)   | 0.7502(3)   | 0.0237(13)  |
| O1_1 | 0.5474(3)  | 0.8360(3)   | 0.5589(2)   | 0.0313(11)  |
| C1_1 | 0.5199(3)  | 0.7461(4)   | 0.5666(2)   | 0.0226(12)  |
| C2_1 | 0.4684(3)  | 0.7468(4)   | 0.6234(3)   | 0.0270(13)  |
| F1_1 | 0.5077(2)  | 0.7494(3)   | 0.67486(16) | 0.0349(9)   |
| F2_1 | 0.4267(2)  | 0.6678(3)   | 0.62509(17) | 0.0315(9)   |
| F3_1 | 0.4256(3)  | 0.8227(3)   | 0.6226(2)   | 0.0434(11)  |
| C3_1 | 0.4762(3)  | 0.7142(5)   | 0.5095(3)   | 0.0284(13)  |
| F4_1 | 0.5132(2)  | 0.7365(3)   | 0.45913(16) | 0.0331(9)   |
| F5_1 | 0.4127(2)  | 0.7609(4)   | 0.50727(19) | 0.0426(11)  |
| F6_1 | 0.4630(2)  | 0.6199(3)   | 0.50893(19) | 0.0407(10)  |
| C4_1 | 0.5840(3)  | 0.6746(4)   | 0.5781(3)   | 0.0272(13)  |
| F7_1 | 0.6161(2)  | 0.6498(3)   | 0.52615(19) | 0.0388(10)  |
| F8_1 | 0.5609(2)  | 0.5934(3)   | 0.6055(2)   | 0.0392(10)  |
| F9_1 | 0.6342(2)  | 0.7139(3)   | 0.6142(2)   | 0.0424(11)  |
| O1_2 | 0.6187(2)  | 0.9199(3)   | 0.45201(17) | 0.0189(8)   |
| C1_2 | 0.6830(3)  | 0.9092(4)   | 0.4218(2)   | 0.0176(11)  |
| C2_2 | 0.7192(3)  | 0.8121(4)   | 0.4398(3)   | 0.0265(13)  |
| F1_2 | 0.6820(2)  | 0.7380(3)   | 0.41588(19) | 0.0345(9)   |
| F2_2 | 0.7880(2)  | 0.8055(3)   | 0.4202(2)   | 0.0449(12)  |
| F3_2 | 0.7189(2)  | 0.8025(3)   | 0.50013(17) | 0.0352(9)   |
| C3_2 | 0.7367(3)  | 0.9940(5)   | 0.4364(3)   | 0.0276(13)  |
| F4_2 | 0.7000(2)  | 1.0772(3)   | 0.43895(19) | 0.0369(9)   |
| F5_2 | 0.7698(2)  | 0.9808(3)   | 0.48972(17) | 0.0379(10)  |
| F6_2 | 0.7885(2)  | 1.0038(3)   | 0.39358(19) | 0.0417(11)  |
| C4_2 | 0.6655(3)  | 0.9101(4)   | 0.3525(2)   | 0.0218(11)  |
| F7_2 | 0.6477(2)  | 0.9985(3)   | 0.33409(16) | 0.0310(9)   |
| F8_2 | 0.7220(2)  | 0.8795(3)   | 0.31877(17) | 0.0326(9)   |
| F9_2 | 0.6092(2)  | 0.8518(3)   | 0.34065(16) | 0.0295(8)   |
| O1_3 | 0.6290(12) | 1.0091(16)  | 0.5682(6)   | 0.018(4)    |
| C1_3 | 0.6457(5)  | 1.0365(7)   | 0.6261(5)   | 0.018(2)    |
| C2_3 | 0.6562(5)  | 1.1480(6)   | 0.6254(4)   | 0.025(2)    |
| F1_3 | 0.5910(5)  | 1.1907(6)   | 0.6212(3)   | 0.038(2)    |
| F2_3 | 0.6885(8)  | 1.1813(10)  | 0.6758(6)   | 0.039(3)    |
| F3_3 | 0.6966(10) | 1.1746(15)  | 0.5779(8)   | 0.035(4)    |
| C3_3 | 0.7179(5)  | 0.9882(6)   | 0.6464(4)   | 0.0224(19)  |
| F4_3 | 0.7177(11) | 0.8945(10)  | 0.6334(10)  | 0.034(4)    |
| F5_3 | 0.7755(4)  | 1.0291(6)   | 0.6190(5)   | 0.032(2)    |
| F6_3 | 0.7292(7)  | 0.9969(11)  | 0.7066(4)   | 0.033(3)    |
| C4_3 | 0.5839(5)  | 1.0099(7)   | 0.6711(4)   | 0.025(2)    |
| F7_3 | 0.5896(5)  | 0.9185(5)   | 0.6893(3)   | 0.0323(18)  |
| F8_3 | 0.5829(14) | 1.0647(13)  | 0.7211(5)   | 0.033(4)    |
| F9_3 | 0.5191(8)  | 1.0208(14)  | 0.6437(12)  | 0.036(4)    |

|      |            |            |            |          |
|------|------------|------------|------------|----------|
| O1_4 | 0.6322(18) | 1.003(2)   | 0.5659(9)  | 0.017(5) |
| C1_4 | 0.6454(7)  | 1.0299(9)  | 0.6244(7)  | 0.018(3) |
| C2_4 | 0.7047(6)  | 1.1109(9)  | 0.6230(6)  | 0.024(3) |
| F1_4 | 0.6903(15) | 1.174(2)   | 0.5786(11) | 0.030(6) |
| F2_4 | 0.7088(11) | 1.1596(15) | 0.6753(8)  | 0.034(4) |
| F3_4 | 0.7702(6)  | 1.0713(10) | 0.6128(7)  | 0.035(3) |
| C3_4 | 0.6748(6)  | 0.9433(8)  | 0.6617(6)  | 0.021(3) |
| F4_4 | 0.6211(6)  | 0.8880(8)  | 0.6823(5)  | 0.026(2) |
| F5_4 | 0.7201(15) | 0.8903(15) | 0.6280(14) | 0.028(6) |
| F6_4 | 0.7117(11) | 0.9736(16) | 0.7111(7)  | 0.028(4) |
| C4_4 | 0.5744(7)  | 1.0684(9)  | 0.6545(6)  | 0.022(3) |
| F7_4 | 0.5180(11) | 1.0105(19) | 0.6432(18) | 0.029(6) |
| F8_4 | 0.582(2)   | 1.077(2)   | 0.7147(7)  | 0.033(6) |
| F9_4 | 0.5581(6)  | 1.1563(7)  | 0.6328(5)  | 0.029(2) |

$U_{eq}$  is defined as 1/3 of the trace of the orthogonalized  $U_{ij}$  tensor.

Table S10: Bond lengths and angles for  $[\text{Fe}_2(\text{CO})_8\text{Br}][\text{F}-\{\text{Al}(\text{OR}^{\text{F}})_3\}_2]$ .

| Atom-Atom             | Length [Å] |                       |                  |
|-----------------------|------------|-----------------------|------------------|
| Fe1-C2                | 1.818(6)   | C3_2-F6_2             | 1.341(6)         |
| Fe1-C1                | 1.840(6)   | C4_2-F7_2             | 1.329(6)         |
| Fe1-C4                | 1.849(6)   | C4_2-F9_2             | 1.335(6)         |
| Fe1-C3                | 1.862(7)   | C4_2-F8_2             | 1.338(6)         |
| Fe1-Br2               | 2.3832(11) | O1_3-C1_3             | 1.360(10)        |
| Fe1-Fe1 <sup>#1</sup> | 2.7901(17) | C1_3-C3_3             | 1.544(10)        |
| O1-C1                 | 1.126(8)   | C1_3-C4_3             | 1.544(10)        |
| O2-C2                 | 1.129(7)   | C1_3-C2_3             | 1.557(10)        |
| Al03-O1_4             | 1.68(2)    | C2_3-F3_3             | 1.328(12)        |
| Al03-O1_1             | 1.691(4)   | C2_3-F1_3             | 1.334(10)        |
| Al03-O1_2             | 1.702(4)   | C2_3-F2_3             | 1.335(10)        |
| Al03-O1_3             | 1.725(16)  | C3_3-F4_3             | 1.330(12)        |
| Al03-F004             | 1.7598(16) | C3_3-F5_3             | 1.339(10)        |
| O3-C4                 | 1.123(8)   | C3_3-F6_3             | 1.340(10)        |
| C3-O4                 | 1.124(8)   | C4_3-F7_3             | 1.333(10)        |
| O1_1-C1_1             | 1.353(7)   | C4_3-F8_3             | 1.333(11)        |
| C1_1-C3_1             | 1.550(7)   | C4_3-F9_3             | 1.336(12)        |
| C1_1-C4_1             | 1.555(7)   | O1_4-C1_4             | 1.357(13)        |
| C1_1-C2_1             | 1.559(7)   | C1_4-C3_4             | 1.549(12)        |
| C2_1-F3_1             | 1.311(7)   | C1_4-C4_4             | 1.551(12)        |
| C2_1-F2_1             | 1.335(7)   | C1_4-C2_4             | 1.560(12)        |
| C2_1-F1_1             | 1.337(6)   | C2_4-F1_4             | 1.329(13)        |
| C3_1-F6_1             | 1.328(7)   | C2_4-F2_4             | 1.332(12)        |
| C3_1-F5_1             | 1.330(7)   | C2_4-F3_4             | 1.337(12)        |
| C3_1-F4_1             | 1.331(7)   | C3_4-F4_4             | 1.325(11)        |
| C4_1-F7_1             | 1.326(7)   | C3_4-F5_4             | 1.330(13)        |
| C4_1-F9_1             | 1.327(7)   | C3_4-F6_4             | 1.341(12)        |
| C4_1-F8_1             | 1.343(7)   | C4_4-F7_4             | 1.329(13)        |
| O1_2-C1_2             | 1.357(6)   | C4_4-F8_4             | 1.332(12)        |
| C1_2-C2_2             | 1.549(7)   | C4_4-F9_4             | 1.341(11)        |
| C1_2-C4_2             | 1.552(7)   |                       |                  |
| C1_2-C3_2             | 1.563(7)   | <b>Atom-Atom-Atom</b> | <b>Angle [°]</b> |
| C2_2-F3_2             | 1.330(6)   | C2-Fe1-C1             | 90.6(3)          |
| C2_2-F2_2             | 1.333(6)   | C2-Fe1-C4             | 101.0(3)         |
| C2_2-F1_2             | 1.337(7)   | C1-Fe1-C4             | 89.3(3)          |
| C3_2-F5_2             | 1.328(6)   | C2-Fe1-C3             | 89.4(3)          |
| C3_2-F4_2             | 1.335(7)   | C1-Fe1-C3             | 178.7(3)         |
|                       |            | C4-Fe1-C3             | 89.5(3)          |

|                |            |                |           |
|----------------|------------|----------------|-----------|
| C2-Fe1-Br2     | 156.0(2)   | F3_2-C2_2-F1_2 | 108.1(5)  |
| C1-Fe1-Br2     | 92.87(19)  | F2_2-C2_2-F1_2 | 107.5(5)  |
| C4-Fe1-Br2     | 102.76(19) | F3_2-C2_2-C1_2 | 109.8(5)  |
| C3-Fe1-Br2     | 87.6(2)    | F2_2-C2_2-C1_2 | 112.4(5)  |
| C2-Fe1-Fe1     | 102.4(2)   | F1_2-C2_2-C1_2 | 110.5(5)  |
| C1-Fe1-Fe1     | 86.5(2)    | F5_2-C3_2-F4_2 | 108.2(5)  |
| C4-Fe1-Fe1     | 156.19(19) | F5_2-C3_2-F6_2 | 107.9(5)  |
| C3-Fe1-Fe1     | 94.8(2)    | F4_2-C3_2-F6_2 | 107.2(5)  |
| Br2-Fe1-Fe1    | 54.17(2)   | F5_2-C3_2-C1_2 | 111.3(5)  |
| O1-C1-Fe1      | 175.1(6)   | F4_2-C3_2-C1_2 | 110.0(5)  |
| Fe1-Br2-Fe1    | 71.66(5)   | F6_2-C3_2-C1_2 | 112.0(5)  |
| O1_4-AlO3-O1_1 | 111.8(11)  | F7_2-C4_2-F9_2 | 108.1(5)  |
| O1_4-AlO3-O1_2 | 109.4(10)  | F7_2-C4_2-F8_2 | 108.2(5)  |
| O1_1-AlO3-O1_2 | 119.0(2)   | F9_2-C4_2-F8_2 | 107.2(5)  |
| O1_1-AlO3-O1_3 | 112.0(7)   | F7_2-C4_2-C1_2 | 110.8(4)  |
| O1_2-AlO3-O1_3 | 111.7(7)   | F9_2-C4_2-C1_2 | 110.1(4)  |
| O1_4-AlO3-F004 | 109.8(12)  | F8_2-C4_2-C1_2 | 112.3(4)  |
| O1_1-AlO3-F004 | 105.82(19) | C1_3-O1_3-AlO3 | 147.4(16) |
| O1_2-AlO3-F004 | 100.14(15) | O1_3-C1_3-C3_3 | 109.9(11) |
| O1_3-AlO3-F004 | 106.6(8)   | O1_3-C1_3-C4_3 | 111.4(11) |
| O4-C3-Fe1      | 176.8(6)   | C3_3-C1_3-C4_3 | 109.8(7)  |
| AlO3-F004-AlO3 | 180.0      | O1_3-C1_3-C2_3 | 107.1(11) |
| O3-C4-Fe1      | 179.1(6)   | C3_3-C1_3-C2_3 | 109.1(7)  |
| O2-C2-Fe1      | 178.3(6)   | C4_3-C1_3-C2_3 | 109.5(8)  |
| C1_1-O1_1-AlO3 | 158.1(4)   | F3_3-C2_3-F1_3 | 108.7(10) |
| O1_1-C1_1-C3_1 | 110.6(5)   | F3_3-C2_3-F2_3 | 107.9(12) |
| O1_1-C1_1-C4_1 | 109.1(5)   | F1_3-C2_3-F2_3 | 107.4(9)  |
| C3_1-C1_1-C4_1 | 109.7(5)   | F3_3-C2_3-C1_3 | 110.6(11) |
| O1_1-C1_1-C2_1 | 108.5(5)   | F1_3-C2_3-C1_3 | 109.3(8)  |
| C3_1-C1_1-C2_1 | 109.6(4)   | F2_3-C2_3-C1_3 | 112.9(9)  |
| C4_1-C1_1-C2_1 | 109.3(4)   | F4_3-C3_3-F5_3 | 108.5(10) |
| F3_1-C2_1-F2_1 | 108.5(5)   | F4_3-C3_3-F6_3 | 107.4(12) |
| F3_1-C2_1-F1_1 | 108.1(5)   | F5_3-C3_3-F6_3 | 106.4(9)  |
| F2_1-C2_1-F1_1 | 107.7(5)   | F4_3-C3_3-C1_3 | 111.0(11) |
| F3_1-C2_1-C1_1 | 110.8(5)   | F5_3-C3_3-C1_3 | 111.1(7)  |
| F2_1-C2_1-C1_1 | 111.2(5)   | F6_3-C3_3-C1_3 | 112.2(9)  |
| F1_1-C2_1-C1_1 | 110.5(5)   | F7_3-C4_3-F8_3 | 107.2(10) |
| F6_1-C3_1-F5_1 | 108.6(5)   | F7_3-C4_3-F9_3 | 108.1(11) |
| F6_1-C3_1-F4_1 | 108.3(5)   | F8_3-C4_3-F9_3 | 107.1(13) |
| F5_1-C3_1-F4_1 | 107.5(5)   | F7_3-C4_3-C1_3 | 111.2(8)  |
| F6_1-C3_1-C1_1 | 112.4(5)   | F8_3-C4_3-C1_3 | 113.5(11) |
| F5_1-C3_1-C1_1 | 109.9(5)   | F9_3-C4_3-C1_3 | 109.6(11) |
| F4_1-C3_1-C1_1 | 110.0(5)   | C1_4-O1_4-AlO3 | 144(2)    |
| F7_1-C4_1-F9_1 | 108.2(5)   | O1_4-C1_4-C3_4 | 110.4(16) |
| F7_1-C4_1-F8_1 | 107.9(5)   | O1_4-C1_4-C4_4 | 110.3(16) |
| F9_1-C4_1-F8_1 | 107.1(5)   | C3_4-C1_4-C4_4 | 109.4(10) |
| F7_1-C4_1-C1_1 | 111.1(5)   | O1_4-C1_4-C2_4 | 107.6(16) |
| F9_1-C4_1-C1_1 | 110.8(5)   | C3_4-C1_4-C2_4 | 109.1(9)  |
| F8_1-C4_1-C1_1 | 111.6(5)   | C4_4-C1_4-C2_4 | 110.0(10) |
| C1_2-O1_2-AlO3 | 145.5(4)   | F1_4-C2_4-F2_4 | 108.1(16) |
| O1_2-C1_2-C2_2 | 109.8(4)   | F1_4-C2_4-F3_4 | 108.9(14) |
| O1_2-C1_2-C4_2 | 107.4(4)   | F2_4-C2_4-F3_4 | 107.5(13) |
| C2_2-C1_2-C4_2 | 110.1(4)   | F1_4-C2_4-C1_4 | 110.3(15) |
| O1_2-C1_2-C3_2 | 111.2(4)   | F2_4-C2_4-C1_4 | 112.7(13) |
| C2_2-C1_2-C3_2 | 109.4(4)   | F3_4-C2_4-C1_4 | 109.3(10) |
| C4_2-C1_2-C3_2 | 108.9(4)   | F4_4-C3_4-F5_4 | 109.4(14) |
| F3_2-C2_2-F2_2 | 108.4(5)   | F4_4-C3_4-F6_4 | 106.2(11) |

|                |           |
|----------------|-----------|
| F5_4-C3_4-F6_4 | 108.0(16) |
| F4_4-C3_4-C1_4 | 111.7(10) |
| F5_4-C3_4-C1_4 | 110.5(15) |
| F6_4-C3_4-C1_4 | 111.0(12) |
| F7_4-C4_4-F8_4 | 108.7(17) |
| F7_4-C4_4-F9_4 | 108.1(14) |
| F8_4-C4_4-F9_4 | 107.2(14) |
| F7_4-C4_4-C1_4 | 111.3(16) |
| F8_4-C4_4-C1_4 | 111.2(15) |
| F9_4-C4_4-C1_4 | 110.3(10) |

Symmetry transformations used to generate equivalent atoms:

#1: 1-X, +Y, 1.5-Z; #2: 1-X, 2-Y, 1-Z;



Table S11: Atomic coordinates and  $U_{\text{eq}}$  [ $\text{\AA}^2$ ] for  $[\text{FeCO}_5][\text{Al}(\text{OR}^{\text{F}})_4]$  (**1**).

| Atom | x            | y           | z           | $U_{\text{eq}}$ |
|------|--------------|-------------|-------------|-----------------|
| Fe1  | 0.63923(4)   | 0.75232(4)  | 0.12815(2)  | 0.02271(13)     |
| C1   | 0.7117(3)    | 0.6927(3)   | 0.16886(16) | 0.0296(10)      |
| C2   | 0.6966(3)    | 0.6981(3)   | 0.08045(16) | 0.0274(10)      |
| Al1  | -0.05482(8)  | 0.32476(7)  | 0.38576(4)  | 0.0176(2)       |
| O3   | 0.7551(3)    | 0.6564(2)   | 0.19296(12) | 0.0400(9)       |
| C3   | 0.5937(3)    | 0.8267(3)   | 0.08620(17) | 0.0292(10)      |
| Al2  | 0.54476(8)   | 0.26769(6)  | 0.13205(4)  | 0.0178(2)       |
| O4   | 0.7305(2)    | 0.6648(2)   | 0.05147(11) | 0.0335(8)       |
| C4   | 0.6009(3)    | 0.8201(3)   | 0.17518(17) | 0.0296(10)      |
| C5   | 0.5313(3)    | 0.6847(2)   | 0.13056(15) | 0.0236(8)       |
| O5   | 0.5686(3)    | 0.8722(2)   | 0.06090(13) | 0.0383(8)       |
| Fe1A | 1.03314(4)   | 0.16953(3)  | 0.13320(2)  | 0.02301(13)     |
| O1A  | 1.1705(2)    | 0.14028(19) | 0.20860(12) | 0.0307(7)       |
| C1A  | 1.1207(3)    | 0.1534(2)   | 0.17995(16) | 0.0250(9)       |
| O7   | 0.4692(2)    | 0.64428(18) | 0.13227(11) | 0.0306(7)       |
| O6   | 0.5776(3)    | 0.8622(2)   | 0.20267(12) | 0.0372(8)       |
| C2A  | 0.9387(3)    | 0.1661(3)   | 0.17716(18) | 0.0296(10)      |
| O2A  | 0.8827(3)    | 0.1629(2)   | 0.20397(13) | 0.0400(8)       |
| C3A  | 0.9408(3)    | 0.1514(3)   | 0.08883(18) | 0.0306(10)      |
| O3A  | 0.8854(3)    | 0.1404(2)   | 0.06289(13) | 0.0372(8)       |
| C4A  | 1.1281(4)    | 0.1539(2)   | 0.08963(16) | 0.0276(10)      |
| O4A  | 1.1849(3)    | 0.1460(2)   | 0.06353(12) | 0.0346(8)       |
| C5A  | 1.0368(3)    | 0.2828(2)   | 0.12896(15) | 0.0250(9)       |
| O5A  | 1.0383(2)    | 0.34893(17) | 0.12549(11) | 0.0300(7)       |
| O1_1 | -0.15650(19) | 0.37992(16) | 0.37743(9)  | 0.0203(6)       |
| C1_1 | -0.2507(3)   | 0.3813(2)   | 0.38360(13) | 0.0196(8)       |
| C2_1 | -0.2748(3)   | 0.3828(3)   | 0.43472(16) | 0.0311(10)      |
| F1_1 | -0.2580(2)   | 0.45537(19) | 0.45214(10) | 0.0429(8)       |
| F2_1 | -0.3647(2)   | 0.3650(2)   | 0.44335(10) | 0.0432(7)       |
| F3_1 | -0.2210(2)   | 0.3312(2)   | 0.45698(9)  | 0.0405(7)       |
| C3_1 | -0.2983(3)   | 0.3074(2)   | 0.36178(16) | 0.0287(10)      |
| F4_1 | -0.2581(2)   | 0.28958(17) | 0.32262(10) | 0.0387(7)       |
| F5_1 | -0.2916(2)   | 0.24337(15) | 0.38893(11) | 0.0420(7)       |
| F6_1 | -0.39094(18) | 0.31890(17) | 0.35396(10) | 0.0362(7)       |
| C4_1 | -0.2912(3)   | 0.4563(3)   | 0.36035(15) | 0.0264(9)       |
| F7_1 | -0.2942(2)   | 0.44731(18) | 0.31540(9)  | 0.0374(7)       |
| F8_1 | -0.37830(18) | 0.47301(15) | 0.37445(10) | 0.0331(6)       |
| F9_1 | -0.23741(19) | 0.51945(14) | 0.36886(11) | 0.0363(6)       |
| O1_2 | 0.0254(2)    | 0.35714(16) | 0.34540(9)  | 0.0212(6)       |
| C1_2 | 0.0376(3)    | 0.3824(2)   | 0.30214(13) | 0.0216(8)       |
| C2_2 | -0.0309(3)   | 0.4511(3)   | 0.29022(16) | 0.0319(10)      |
| F1_2 | -0.1162(2)   | 0.4245(2)   | 0.28012(10) | 0.0440(8)       |
| F2_2 | -0.0003(3)   | 0.4952(2)   | 0.25549(12) | 0.0555(9)       |
| F3_2 | -0.0396(2)   | 0.49957(15) | 0.32589(11) | 0.0424(7)       |
| C3_2 | 0.1400(3)    | 0.4127(3)   | 0.29741(15) | 0.0313(10)      |
| F4_2 | 0.2000(2)    | 0.3630(2)   | 0.31717(11) | 0.0505(9)       |
| F5_2 | 0.1494(2)    | 0.48296(18) | 0.31795(10) | 0.0443(8)       |
| F6_2 | 0.1666(2)    | 0.4213(2)   | 0.25439(10) | 0.0431(8)       |
| C4_2 | 0.0208(4)    | 0.3128(3)   | 0.26878(16) | 0.0397(12)      |
| F7_2 | 0.0914(3)    | 0.26065(19) | 0.27080(12) | 0.0582(10)      |
| F8_2 | 0.0146(3)    | 0.3373(2)   | 0.22571(10) | 0.0553(9)       |
| F9_2 | -0.0581(2)   | 0.27423(19) | 0.27886(10) | 0.0483(8)       |
| O1_3 | -0.0009(2)   | 0.33925(16) | 0.43792(10) | 0.0219(6)       |
| C1_3 | 0.0498(3)    | 0.3868(2)   | 0.46564(13) | 0.0207(8)       |

|      |             |             |             |            |
|------|-------------|-------------|-------------|------------|
| C2_3 | 0.0755(3)   | 0.3383(3)   | 0.50886(15) | 0.0322(10) |
| F1_3 | 0.0017(2)   | 0.29689(17) | 0.52370(9)  | 0.0390(7)  |
| F2_3 | 0.1042(2)   | 0.38512(19) | 0.54273(9)  | 0.0430(8)  |
| F3_3 | 0.1441(2)   | 0.28668(17) | 0.50008(11) | 0.0455(8)  |
| C3_3 | 0.1430(3)   | 0.4142(3)   | 0.44249(15) | 0.0281(9)  |
| F4_3 | 0.1256(2)   | 0.47160(15) | 0.41215(9)  | 0.0332(6)  |
| F5_3 | 0.1830(2)   | 0.35418(17) | 0.42022(10) | 0.0373(7)  |
| F6_3 | 0.2056(2)   | 0.4425(2)   | 0.47202(10) | 0.0421(7)  |
| C4_3 | -0.0088(3)  | 0.4604(3)   | 0.47954(15) | 0.0262(9)  |
| F7_3 | -0.0495(2)  | 0.49298(15) | 0.44310(9)  | 0.0333(6)  |
| F8_3 | 0.0429(2)   | 0.51719(15) | 0.49939(9)  | 0.0356(7)  |
| F9_3 | -0.0774(2)  | 0.44013(17) | 0.50831(9)  | 0.0364(7)  |
| O1_4 | -0.0817(5)  | 0.2255(3)   | 0.3816(2)   | 0.0216(9)  |
| C1_4 | -0.0577(4)  | 0.1486(3)   | 0.39020(19) | 0.0252(11) |
| C2_4 | -0.1264(4)  | 0.1136(3)   | 0.4255(2)   | 0.0372(14) |
| F1_4 | -0.2099(2)  | 0.0980(2)   | 0.40711(17) | 0.0484(11) |
| F2_4 | -0.0929(8)  | 0.0459(4)   | 0.4437(3)   | 0.0575(14) |
| F3_4 | -0.1404(4)  | 0.1645(5)   | 0.45983(18) | 0.0467(14) |
| C3_4 | 0.0437(4)   | 0.1429(3)   | 0.40860(19) | 0.0315(12) |
| F4_4 | 0.1008(5)   | 0.1941(4)   | 0.3868(3)   | 0.0365(12) |
| F5_4 | 0.0485(3)   | 0.1615(2)   | 0.45270(12) | 0.0401(9)  |
| F6_4 | 0.0819(3)   | 0.0705(2)   | 0.40395(16) | 0.0439(11) |
| C4_4 | -0.0649(4)  | 0.1018(3)   | 0.3453(2)   | 0.0355(13) |
| F7_4 | 0.0090(3)   | 0.1180(3)   | 0.31852(14) | 0.0466(12) |
| F8_4 | -0.0652(4)  | 0.0227(2)   | 0.3519(2)   | 0.0517(13) |
| F9_4 | -0.1420(5)  | 0.1204(4)   | 0.32246(17) | 0.0483(12) |
| O1_5 | 0.44040(19) | 0.31833(16) | 0.12269(9)  | 0.0201(6)  |
| C1_5 | 0.3645(3)   | 0.3523(2)   | 0.14228(13) | 0.0203(8)  |
| C2_5 | 0.3093(3)   | 0.2912(2)   | 0.17144(14) | 0.0226(9)  |
| F1_5 | 0.34866(18) | 0.27959(15) | 0.21183(8)  | 0.0290(6)  |
| F2_5 | 0.21985(17) | 0.31279(15) | 0.17912(9)  | 0.0279(6)  |
| F3_5 | 0.30660(19) | 0.22052(14) | 0.15079(9)  | 0.0297(6)  |
| C3_5 | 0.2976(3)   | 0.3828(3)   | 0.10432(16) | 0.0308(10) |
| F4_5 | 0.3471(2)   | 0.41842(19) | 0.07165(10) | 0.0467(8)  |
| F5_5 | 0.2524(2)   | 0.32190(19) | 0.08519(10) | 0.0412(7)  |
| F6_5 | 0.2339(2)   | 0.43334(17) | 0.11956(11) | 0.0424(8)  |
| C4_5 | 0.3943(3)   | 0.4225(3)   | 0.17323(16) | 0.0293(10) |
| F7_5 | 0.4173(2)   | 0.48593(15) | 0.14849(11) | 0.0426(8)  |
| F8_5 | 0.3258(2)   | 0.44442(17) | 0.20188(11) | 0.0414(7)  |
| F9_5 | 0.4693(2)   | 0.40220(17) | 0.19780(9)  | 0.0350(6)  |
| O1_6 | 0.5256(2)   | 0.20358(17) | 0.17685(10) | 0.0233(6)  |
| C1_6 | 0.5625(3)   | 0.1545(2)   | 0.20828(14) | 0.0222(8)  |
| C2_6 | 0.4797(3)   | 0.1107(3)   | 0.23197(15) | 0.0295(10) |
| F1_6 | 0.43793(19) | 0.15793(17) | 0.26294(9)  | 0.0340(6)  |
| F2_6 | 0.5072(2)   | 0.04547(17) | 0.25406(11) | 0.0433(8)  |
| F3_6 | 0.4141(2)   | 0.09027(16) | 0.20262(10) | 0.0378(7)  |
| C3_6 | 0.6284(4)   | 0.0919(3)   | 0.18598(16) | 0.0313(10) |
| F4_6 | 0.6856(2)   | 0.12675(18) | 0.15600(10) | 0.0387(7)  |
| F5_6 | 0.5784(2)   | 0.03740(16) | 0.16362(11) | 0.0465(8)  |
| F6_6 | 0.6820(2)   | 0.05419(18) | 0.21610(10) | 0.0431(8)  |
| C4_6 | 0.6189(3)   | 0.2015(3)   | 0.24413(15) | 0.0266(9)  |
| F7_6 | 0.70324(19) | 0.22310(17) | 0.22852(9)  | 0.0343(6)  |
| F8_6 | 0.6331(2)   | 0.15960(18) | 0.28235(9)  | 0.0378(7)  |
| F9_6 | 0.5735(2)   | 0.26767(16) | 0.25581(10) | 0.0367(7)  |
| O1_7 | 0.5735(2)   | 0.21798(17) | 0.08310(10) | 0.0249(6)  |
| C1_7 | 0.5431(3)   | 0.1812(2)   | 0.04471(14) | 0.0256(9)  |
| C2_7 | 0.6309(4)   | 0.1499(3)   | 0.01987(17) | 0.0401(12) |

|      |             |             |              |            |
|------|-------------|-------------|--------------|------------|
| F1_7 | 0.6795(3)   | 0.20998(19) | 0.00146(12)  | 0.0557(10) |
| F2_7 | 0.6097(3)   | 0.09934(18) | -0.01370(11) | 0.0499(9)  |
| F3_7 | 0.6889(2)   | 0.11250(19) | 0.04852(12)  | 0.0484(8)  |
| C3_7 | 0.4766(3)   | 0.1107(3)   | 0.05618(16)  | 0.0323(10) |
| F4_7 | 0.4153(2)   | 0.13159(17) | 0.08822(10)  | 0.0371(7)  |
| F5_7 | 0.5256(2)   | 0.04860(16) | 0.07156(11)  | 0.0427(7)  |
| F6_7 | 0.4272(2)   | 0.08653(19) | 0.02012(11)  | 0.0474(8)  |
| C4_7 | 0.4893(4)   | 0.2404(3)   | 0.01384(15)  | 0.0376(11) |
| F7_7 | 0.4012(2)   | 0.2507(2)   | 0.02752(10)  | 0.0456(8)  |
| F8_7 | 0.4863(3)   | 0.2152(2)   | -0.02959(10) | 0.0581(10) |
| F9_7 | 0.5322(3)   | 0.31089(17) | 0.01365(11)  | 0.0521(9)  |
| O1_8 | 0.6378(2)   | 0.32927(17) | 0.14615(10)  | 0.0231(6)  |
| C1_8 | 0.7033(3)   | 0.3830(2)   | 0.13379(15)  | 0.0236(8)  |
| C2_8 | 0.7672(4)   | 0.3501(3)   | 0.09601(19)  | 0.0407(12) |
| F1_8 | 0.7233(3)   | 0.3518(2)   | 0.05606(11)  | 0.0561(10) |
| F2_8 | 0.8475(2)   | 0.39153(19) | 0.09132(12)  | 0.0492(8)  |
| F3_8 | 0.7912(2)   | 0.27507(18) | 0.10443(14)  | 0.0586(10) |
| C3_8 | 0.7642(4)   | 0.4024(3)   | 0.17603(18)  | 0.0396(12) |
| F4_8 | 0.7119(3)   | 0.4114(2)   | 0.21258(11)  | 0.0555(9)  |
| F5_8 | 0.8246(2)   | 0.3435(2)   | 0.18429(13)  | 0.0569(9)  |
| F6_8 | 0.8151(2)   | 0.46911(19) | 0.17060(12)  | 0.0532(9)  |
| C4_8 | 0.6557(3)   | 0.4611(3)   | 0.1170(2)    | 0.0396(12) |
| F7_8 | 0.6228(2)   | 0.50375(17) | 0.15193(14)  | 0.0557(10) |
| F8_8 | 0.7156(2)   | 0.50779(19) | 0.09429(14)  | 0.0563(10) |
| F9_8 | 0.5840(2)   | 0.44435(19) | 0.08979(12)  | 0.0486(8)  |
| O1_9 | -0.084(4)   | 0.226(2)    | 0.375(2)     | 0.0216(9)  |
| C1_9 | -0.0627(18) | 0.1474(19)  | 0.3816(9)    | 0.024(5)   |
| C2_9 | 0.0397(17)  | 0.1320(17)  | 0.3661(10)   | 0.031(5)   |
| F1_9 | 0.097(4)    | 0.191(3)    | 0.380(2)     | 0.033(6)   |
| F2_9 | 0.076(3)    | 0.064(2)    | 0.3819(13)   | 0.045(6)   |
| F3_9 | 0.047(3)    | 0.129(3)    | 0.3209(10)   | 0.045(6)   |
| C3_9 | -0.1306(18) | 0.0976(18)  | 0.3517(11)   | 0.039(5)   |
| F4_9 | -0.2156(17) | 0.0921(16)  | 0.3706(16)   | 0.059(9)   |
| F5_9 | -0.142(4)   | 0.130(4)    | 0.3111(13)   | 0.048(6)   |
| F6_9 | -0.099(3)   | 0.023(2)    | 0.346(2)     | 0.052(7)   |
| C4_9 | -0.078(2)   | 0.127(2)    | 0.4320(9)    | 0.032(6)   |
| F7_9 | -0.153(3)   | 0.165(5)    | 0.4495(17)   | 0.044(7)   |
| F8_9 | -0.093(6)   | 0.049(3)    | 0.438(2)     | 0.053(6)   |
| F9_9 | -0.005(2)   | 0.148(2)    | 0.4576(10)   | 0.046(6)   |

$U_{eq}$  is defined as 1/3 of the trace of the orthogonalized  $U_{ij}$  tensor.

Table S12: Bond lengths and angles for  $[\text{FeCO}_5][\text{Al}(\text{OR}^{\text{F}})_4]$  (**1**).

| Atom–Atom | Length [Å] |          |          |
|-----------|------------|----------|----------|
| Fe1–C2    | 1.865(5)   | C3–O5    | 1.126(6) |
| Fe1–C1    | 1.872(5)   | Al2–O1_7 | 1.718(3) |
| Fe1–C3    | 1.876(5)   | Al2–O1_6 | 1.728(3) |
| Fe1–C4    | 1.876(5)   | Al2–O1_8 | 1.730(3) |
| Fe1–C5    | 1.910(4)   | Al2–O1_5 | 1.731(3) |
| C1–O3     | 1.122(6)   | C4–O6    | 1.127(6) |
| C2–O4     | 1.130(6)   | C5–O7    | 1.115(5) |
| Al1–O1_4  | 1.718(5)   | Fe1A–C2A | 1.866(5) |
| Al1–O1_1  | 1.734(3)   | Fe1A–C1A | 1.876(5) |
| Al1–O1_2  | 1.735(3)   | Fe1A–C3A | 1.877(5) |
| Al1–O1_3  | 1.736(3)   | Fe1A–C4A | 1.881(5) |
| Al1–O1_9  | 1.74(4)    | Fe1A–C5A | 1.911(4) |
|           |            | O1A–C1A  | 1.123(6) |

|           |          |           |           |
|-----------|----------|-----------|-----------|
| C2A-O2A   | 1.123(6) | C1_5-C4_5 | 1.552(6)  |
| C3A-O3A   | 1.113(6) | C1_5-C2_5 | 1.553(5)  |
| C4A-O4A   | 1.123(6) | C1_5-C3_5 | 1.555(6)  |
| C5A-O5A   | 1.118(5) | C2_5-F1_5 | 1.330(5)  |
| O1_1-C1_1 | 1.350(5) | C2_5-F3_5 | 1.337(5)  |
| C1_1-C2_1 | 1.547(6) | C2_5-F2_5 | 1.341(5)  |
| C1_1-C4_1 | 1.547(6) | C3_5-F6_5 | 1.321(5)  |
| C1_1-C3_1 | 1.555(5) | C3_5-F5_5 | 1.335(6)  |
| C2_1-F3_1 | 1.330(5) | C3_5-F4_5 | 1.335(5)  |
| C2_1-F2_1 | 1.335(5) | C4_5-F9_5 | 1.333(5)  |
| C2_1-F1_1 | 1.347(6) | C4_5-F7_5 | 1.333(5)  |
| C3_1-F4_1 | 1.323(5) | C4_5-F8_5 | 1.340(5)  |
| C3_1-F5_1 | 1.346(5) | O1_6-C1_6 | 1.347(5)  |
| C3_1-F6_1 | 1.349(5) | C1_6-C4_6 | 1.545(6)  |
| C4_1-F9_1 | 1.333(5) | C1_6-C2_6 | 1.553(6)  |
| C4_1-F8_1 | 1.334(5) | C1_6-C3_6 | 1.555(6)  |
| C4_1-F7_1 | 1.335(5) | C2_6-F3_6 | 1.318(5)  |
| O1_2-C1_2 | 1.356(5) | C2_6-F2_6 | 1.335(5)  |
| C1_2-C3_2 | 1.547(6) | C2_6-F1_6 | 1.349(5)  |
| C1_2-C4_2 | 1.547(6) | C3_6-F6_6 | 1.331(5)  |
| C1_2-C2_2 | 1.552(6) | C3_6-F5_6 | 1.335(5)  |
| C2_2-F1_2 | 1.325(6) | C3_6-F4_6 | 1.336(5)  |
| C2_2-F3_2 | 1.337(6) | C4_6-F9_6 | 1.332(5)  |
| C2_2-F2_2 | 1.337(5) | C4_6-F7_6 | 1.333(5)  |
| C3_2-F4_2 | 1.328(5) | C4_6-F8_6 | 1.345(5)  |
| C3_2-F6_2 | 1.332(5) | O1_7-C1_7 | 1.361(5)  |
| C3_2-F5_2 | 1.336(6) | C1_7-C2_7 | 1.539(6)  |
| C4_2-F9_2 | 1.329(6) | C1_7-C4_7 | 1.551(6)  |
| C4_2-F7_2 | 1.334(6) | C1_7-C3_7 | 1.553(6)  |
| C4_2-F8_2 | 1.338(6) | C2_7-F3_7 | 1.338(6)  |
| O1_3-C1_3 | 1.351(5) | C2_7-F1_7 | 1.338(6)  |
| C1_3-C4_3 | 1.548(6) | C2_7-F2_7 | 1.340(5)  |
| C1_3-C2_3 | 1.557(6) | C3_7-F4_7 | 1.332(5)  |
| C1_3-C3_3 | 1.559(6) | C3_7-F5_7 | 1.335(6)  |
| C2_3-F3_3 | 1.331(6) | C3_7-F6_7 | 1.337(5)  |
| C2_3-F1_3 | 1.332(5) | C4_7-F7_7 | 1.325(6)  |
| C2_3-F2_3 | 1.336(5) | C4_7-F9_7 | 1.333(6)  |
| C3_3-F5_3 | 1.332(5) | C4_7-F8_7 | 1.350(5)  |
| C3_3-F6_3 | 1.333(5) | O1_8-C1_8 | 1.347(5)  |
| C3_3-F4_3 | 1.340(5) | C1_8-C2_8 | 1.540(6)  |
| C4_3-F9_3 | 1.337(5) | C1_8-C3_8 | 1.552(6)  |
| C4_3-F7_3 | 1.338(5) | C1_8-C4_8 | 1.559(6)  |
| C4_3-F8_3 | 1.339(5) | C2_8-F3_8 | 1.332(6)  |
| O1_4-C1_4 | 1.362(5) | C2_8-F1_8 | 1.334(6)  |
| C1_4-C3_4 | 1.541(7) | C2_8-F2_8 | 1.343(6)  |
| C1_4-C2_4 | 1.543(7) | C3_8-F4_8 | 1.318(6)  |
| C1_4-C4_4 | 1.546(7) | C3_8-F5_8 | 1.334(6)  |
| C2_4-F1_4 | 1.331(7) | C3_8-F6_8 | 1.344(5)  |
| C2_4-F3_4 | 1.341(8) | C4_8-F9_8 | 1.326(6)  |
| C2_4-F2_4 | 1.346(8) | C4_8-F8_8 | 1.338(5)  |
| C3_4-F5_4 | 1.340(6) | C4_8-F7_8 | 1.341(6)  |
| C3_4-F6_4 | 1.341(6) | O1_9-C1_9 | 1.36(2)   |
| C3_4-F4_4 | 1.347(8) | C1_9-C4_9 | 1.542(17) |
| C4_4-F9_4 | 1.322(8) | C1_9-C2_9 | 1.545(17) |
| C4_4-F7_4 | 1.340(7) | C1_9-C3_9 | 1.551(18) |
| C4_4-F8_4 | 1.345(6) | C2_9-F2_9 | 1.333(18) |
| O1_5-C1_5 | 1.350(5) | C2_9-F3_9 | 1.339(18) |

|                       |                  |                |          |
|-----------------------|------------------|----------------|----------|
| C2_9-F1_9             | 1.341(19)        | C2_1-C1_1-C4_1 | 109.7(3) |
| C3_9-F5_9             | 1.325(19)        | O1_1-C1_1-C3_1 | 111.1(3) |
| C3_9-F4_9             | 1.332(19)        | C2_1-C1_1-C3_1 | 108.7(3) |
| C3_9-F6_9             | 1.338(19)        | C4_1-C1_1-C3_1 | 107.9(3) |
| C4_9-F9_9             | 1.332(19)        | F3_1-C2_1-F2_1 | 107.9(4) |
| C4_9-F8_9             | 1.334(19)        | F3_1-C2_1-F1_1 | 107.6(4) |
| C4_9-F7_9             | 1.346(19)        | F2_1-C2_1-F1_1 | 107.5(4) |
| <hr/>                 |                  |                |          |
| <b>Atom-Atom-Atom</b> | <b>Angle [°]</b> |                |          |
| C2-Fe1-C1             | 88.9(2)          | F3_1-C2_1-C1_1 | 110.1(4) |
| C2-Fe1-C3             | 88.8(2)          | F2_1-C2_1-C1_1 | 113.2(4) |
| C1-Fe1-C3             | 166.0(2)         | F1_1-C2_1-C1_1 | 110.3(4) |
| C2-Fe1-C4             | 169.14(19)       | F4_1-C3_1-F5_1 | 107.9(4) |
| C1-Fe1-C4             | 90.6(2)          | F4_1-C3_1-F6_1 | 107.7(4) |
| C3-Fe1-C4             | 89.0(2)          | F5_1-C3_1-F6_1 | 106.6(4) |
| C2-Fe1-C5             | 94.98(19)        | F4_1-C3_1-C1_1 | 110.8(4) |
| C1-Fe1-C5             | 95.62(19)        | F5_1-C3_1-C1_1 | 111.3(4) |
| C3-Fe1-C5             | 98.38(19)        | F6_1-C3_1-C1_1 | 112.3(3) |
| C4-Fe1-C5             | 95.86(19)        | F9_1-C4_1-F8_1 | 107.7(3) |
| O3-C1-Fe1             | 179.3(5)         | F9_1-C4_1-F7_1 | 107.2(4) |
| O4-C2-Fe1             | 179.3(4)         | F8_1-C4_1-F7_1 | 107.7(3) |
| O1_4-Al1-O1_1         | 109.0(3)         | F9_1-C4_1-C1_1 | 110.7(3) |
| O1_4-Al1-O1_2         | 113.7(3)         | F8_1-C4_1-C1_1 | 112.3(3) |
| O1_1-Al1-O1_2         | 106.31(14)       | F7_1-C4_1-C1_1 | 111.1(3) |
| O1_4-Al1-O1_3         | 107.3(2)         | C1_2-O1_2-Al1  | 145.9(3) |
| O1_1-Al1-O1_3         | 114.68(15)       | O1_2-C1_2-C3_2 | 107.9(3) |
| O1_2-Al1-O1_3         | 105.93(15)       | O1_2-C1_2-C4_2 | 110.0(3) |
| O1_1-Al1-O1_9         | 106.9(19)        | C3_2-C1_2-C4_2 | 109.6(4) |
| O1_2-Al1-O1_9         | 110(2)           | O1_2-C1_2-C2_2 | 111.5(3) |
| O1_3-Al1-O1_9         | 113.2(19)        | C3_2-C1_2-C2_2 | 108.8(4) |
| O5-C3-Fe1             | 178.2(4)         | C4_2-C1_2-C2_2 | 108.9(4) |
| O1_7-Al2-O1_6         | 112.10(15)       | F1_2-C2_2-F3_2 | 107.4(4) |
| O1_7-Al2-O1_8         | 108.21(15)       | F1_2-C2_2-F2_2 | 108.2(4) |
| O1_6-Al2-O1_8         | 108.10(15)       | F3_2-C2_2-F2_2 | 107.2(4) |
| O1_7-Al2-O1_5         | 108.01(15)       | F1_2-C2_2-C1_2 | 111.8(4) |
| O1_6-Al2-O1_5         | 107.12(15)       | F3_2-C2_2-C1_2 | 109.5(4) |
| O1_8-Al2-O1_5         | 113.38(15)       | F2_2-C2_2-C1_2 | 112.6(4) |
| O6-C4-Fe1             | 178.3(4)         | F4_2-C3_2-F6_2 | 107.7(4) |
| O7-C5-Fe1             | 178.8(4)         | F4_2-C3_2-F5_2 | 107.1(4) |
| C2A-Fe1A-C1A          | 87.77(19)        | F6_2-C3_2-F5_2 | 107.9(4) |
| C2A-Fe1A-C3A          | 88.7(2)          | F4_2-C3_2-C1_2 | 110.8(4) |
| C1A-Fe1A-C3A          | 162.09(19)       | F6_2-C3_2-C1_2 | 112.9(4) |
| C2A-Fe1A-C4A          | 170.22(19)       | F5_2-C3_2-C1_2 | 110.2(4) |
| C1A-Fe1A-C4A          | 90.41(19)        | F9_2-C4_2-F7_2 | 107.6(4) |
| C3A-Fe1A-C4A          | 90.1(2)          | F9_2-C4_2-F8_2 | 107.9(4) |
| C2A-Fe1A-C5A          | 95.49(19)        | F7_2-C4_2-F8_2 | 107.1(4) |
| C1A-Fe1A-C5A          | 100.01(19)       | F9_2-C4_2-C1_2 | 110.9(4) |
| C3A-Fe1A-C5A          | 97.81(19)        | F7_2-C4_2-C1_2 | 110.7(4) |
| C4A-Fe1A-C5A          | 94.29(19)        | F8_2-C4_2-C1_2 | 112.4(4) |
| O1A-C1A-Fe1A          | 176.2(4)         | C1_3-O1_3-Al1  | 148.7(3) |
| O2A-C2A-Fe1A          | 178.7(5)         | O1_3-C1_3-C4_3 | 110.4(3) |
| O3A-C3A-Fe1A          | 179.2(5)         | O1_3-C1_3-C2_3 | 108.0(3) |
| O4A-C4A-Fe1A          | 178.8(4)         | C4_3-C1_3-C2_3 | 109.2(3) |
| O5A-C5A-Fe1A          | 178.4(4)         | O1_3-C1_3-C3_3 | 111.2(3) |
| C1_1-O1_1-Al1         | 144.6(3)         | C4_3-C1_3-C3_3 | 109.5(3) |
| O1_1-C1_1-C2_1        | 110.6(3)         | C2_3-C1_3-C3_3 | 108.4(3) |
| O1_1-C1_1-C4_1        | 108.8(3)         | F3_3-C2_3-F1_3 | 107.4(4) |
|                       |                  | F3_3-C2_3-F2_3 | 107.9(4) |
|                       |                  | F1_3-C2_3-F2_3 | 107.6(4) |

|                |          |                |          |
|----------------|----------|----------------|----------|
| F3_3-C2_3-C1_3 | 110.8(4) | F5_5-C3_5-C1_5 | 110.2(3) |
| F1_3-C2_3-C1_3 | 111.0(4) | F4_5-C3_5-C1_5 | 110.3(4) |
| F2_3-C2_3-C1_3 | 112.0(4) | F9_5-C4_5-F7_5 | 107.9(4) |
| F5_3-C3_3-F6_3 | 108.0(4) | F9_5-C4_5-F8_5 | 107.9(4) |
| F5_3-C3_3-F4_3 | 107.2(4) | F7_5-C4_5-F8_5 | 107.6(4) |
| F6_3-C3_3-F4_3 | 107.6(4) | F9_5-C4_5-C1_5 | 110.0(3) |
| F5_3-C3_3-C1_3 | 110.7(3) | F7_5-C4_5-C1_5 | 110.7(4) |
| F6_3-C3_3-C1_3 | 112.7(4) | F8_5-C4_5-C1_5 | 112.5(4) |
| F4_3-C3_3-C1_3 | 110.5(4) | C1_6-O1_6-AI2  | 148.0(3) |
| F9_3-C4_3-F7_3 | 107.4(4) | O1_6-C1_6-C4_6 | 111.0(3) |
| F9_3-C4_3-F8_3 | 107.7(4) | O1_6-C1_6-C2_6 | 107.9(3) |
| F7_3-C4_3-F8_3 | 107.2(3) | C4_6-C1_6-C2_6 | 109.1(3) |
| F9_3-C4_3-C1_3 | 110.8(4) | O1_6-C1_6-C3_6 | 111.0(3) |
| F7_3-C4_3-C1_3 | 110.3(3) | C4_6-C1_6-C3_6 | 108.9(4) |
| F8_3-C4_3-C1_3 | 113.2(4) | C2_6-C1_6-C3_6 | 108.9(3) |
| C1_4-O1_4-AI1  | 148.8(5) | F3_6-C2_6-F2_6 | 108.3(4) |
| O1_4-C1_4-C3_4 | 111.0(5) | F3_6-C2_6-F1_6 | 106.7(4) |
| O1_4-C1_4-C2_4 | 109.3(5) | F2_6-C2_6-F1_6 | 106.4(4) |
| C3_4-C1_4-C2_4 | 109.2(5) | F3_6-C2_6-C1_6 | 111.3(4) |
| O1_4-C1_4-C4_4 | 108.0(5) | F2_6-C2_6-C1_6 | 112.9(4) |
| C3_4-C1_4-C4_4 | 109.4(4) | F1_6-C2_6-C1_6 | 110.9(3) |
| C2_4-C1_4-C4_4 | 110.0(5) | F6_6-C3_6-F5_6 | 107.8(4) |
| F1_4-C2_4-F3_4 | 107.5(5) | F6_6-C3_6-F4_6 | 107.7(4) |
| F1_4-C2_4-F2_4 | 108.0(6) | F5_6-C3_6-F4_6 | 107.3(4) |
| F3_4-C2_4-F2_4 | 107.0(6) | F6_6-C3_6-C1_6 | 112.7(4) |
| F1_4-C2_4-C1_4 | 111.3(5) | F5_6-C3_6-C1_6 | 110.8(4) |
| F3_4-C2_4-C1_4 | 111.1(5) | F4_6-C3_6-C1_6 | 110.4(3) |
| F2_4-C2_4-C1_4 | 111.7(6) | F9_6-C4_6-F7_6 | 107.2(4) |
| F5_4-C3_4-F6_4 | 106.9(4) | F9_6-C4_6-F8_6 | 107.1(4) |
| F5_4-C3_4-F4_4 | 106.4(5) | F7_6-C4_6-F8_6 | 107.3(4) |
| F6_4-C3_4-F4_4 | 106.9(5) | F9_6-C4_6-C1_6 | 110.8(3) |
| F5_4-C3_4-C1_4 | 112.0(4) | F7_6-C4_6-C1_6 | 111.7(4) |
| F6_4-C3_4-C1_4 | 113.5(4) | F8_6-C4_6-C1_6 | 112.5(4) |
| F4_4-C3_4-C1_4 | 110.7(5) | C1_7-O1_7-AI2  | 147.7(3) |
| F9_4-C4_4-F7_4 | 107.4(5) | O1_7-C1_7-C2_7 | 107.1(4) |
| F9_4-C4_4-F8_4 | 107.8(5) | O1_7-C1_7-C4_7 | 110.6(3) |
| F7_4-C4_4-F8_4 | 106.8(5) | C2_7-C1_7-C4_7 | 109.8(4) |
| F9_4-C4_4-C1_4 | 111.7(5) | O1_7-C1_7-C3_7 | 111.0(3) |
| F7_4-C4_4-C1_4 | 110.5(4) | C2_7-C1_7-C3_7 | 109.6(4) |
| F8_4-C4_4-C1_4 | 112.3(5) | C4_7-C1_7-C3_7 | 108.6(4) |
| C1_5-O1_5-AI2  | 145.4(3) | F3_7-C2_7-F1_7 | 107.2(5) |
| O1_5-C1_5-C4_5 | 110.9(3) | F3_7-C2_7-F2_7 | 107.8(4) |
| O1_5-C1_5-C2_5 | 111.0(3) | F1_7-C2_7-F2_7 | 107.2(4) |
| C4_5-C1_5-C2_5 | 108.4(3) | F3_7-C2_7-C1_7 | 111.0(4) |
| O1_5-C1_5-C3_5 | 108.6(3) | F1_7-C2_7-C1_7 | 110.6(4) |
| C4_5-C1_5-C3_5 | 109.8(3) | F2_7-C2_7-C1_7 | 112.8(4) |
| C2_5-C1_5-C3_5 | 108.0(3) | F4_7-C3_7-F5_7 | 107.8(4) |
| F1_5-C2_5-F3_5 | 106.8(3) | F4_7-C3_7-F6_7 | 107.6(4) |
| F1_5-C2_5-F2_5 | 106.6(3) | F5_7-C3_7-F6_7 | 107.8(4) |
| F3_5-C2_5-F2_5 | 106.9(3) | F4_7-C3_7-C1_7 | 110.5(4) |
| F1_5-C2_5-C1_5 | 112.4(3) | F5_7-C3_7-C1_7 | 110.8(4) |
| F3_5-C2_5-C1_5 | 110.6(3) | F6_7-C3_7-C1_7 | 112.2(4) |
| F2_5-C2_5-C1_5 | 113.1(3) | F7_7-C4_7-F9_7 | 108.5(4) |
| F6_5-C3_5-F5_5 | 108.0(4) | F7_7-C4_7-F8_7 | 107.5(4) |
| F6_5-C3_5-F4_5 | 108.5(4) | F9_7-C4_7-F8_7 | 106.9(4) |
| F5_5-C3_5-F4_5 | 107.0(4) | F7_7-C4_7-C1_7 | 111.7(4) |
| F6_5-C3_5-C1_5 | 112.7(4) | F9_7-C4_7-C1_7 | 110.4(4) |

|                |           |
|----------------|-----------|
| F8_7-C4_7-C1_7 | 111.7(4)  |
| C1_8-O1_8-AI2  | 149.8(3)  |
| O1_8-C1_8-C2_8 | 111.2(3)  |
| O1_8-C1_8-C3_8 | 108.0(4)  |
| C2_8-C1_8-C3_8 | 109.1(4)  |
| O1_8-C1_8-C4_8 | 110.7(3)  |
| C2_8-C1_8-C4_8 | 109.1(4)  |
| C3_8-C1_8-C4_8 | 108.6(4)  |
| F3_8-C2_8-F1_8 | 107.7(4)  |
| F3_8-C2_8-F2_8 | 107.1(4)  |
| F1_8-C2_8-F2_8 | 107.1(4)  |
| F3_8-C2_8-C1_8 | 110.9(4)  |
| F1_8-C2_8-C1_8 | 110.8(4)  |
| F2_8-C2_8-C1_8 | 112.9(4)  |
| F4_8-C3_8-F5_8 | 107.3(4)  |
| F4_8-C3_8-F6_8 | 107.8(4)  |
| F5_8-C3_8-F6_8 | 107.3(4)  |
| F4_8-C3_8-C1_8 | 111.5(4)  |
| F5_8-C3_8-C1_8 | 110.4(4)  |
| F6_8-C3_8-C1_8 | 112.3(4)  |
| F9_8-C4_8-F8_8 | 108.1(4)  |
| F9_8-C4_8-F7_8 | 108.2(4)  |
| F8_8-C4_8-F7_8 | 106.9(4)  |
| F9_8-C4_8-C1_8 | 110.3(4)  |
| F8_8-C4_8-C1_8 | 112.3(4)  |
| F7_8-C4_8-C1_8 | 110.9(4)  |
| C1_9-O1_9-AI1  | 148(4)    |
| O1_9-C1_9-C4_9 | 108(3)    |
| O1_9-C1_9-C2_9 | 109(3)    |
| C4_9-C1_9-C2_9 | 112.3(19) |
| O1_9-C1_9-C3_9 | 108(3)    |
| C4_9-C1_9-C3_9 | 109.9(19) |
| C2_9-C1_9-C3_9 | 109.0(17) |
| F2_9-C2_9-F3_9 | 106(2)    |
| F2_9-C2_9-F1_9 | 107(3)    |
| F3_9-C2_9-F1_9 | 106(3)    |
| F2_9-C2_9-C1_9 | 114(2)    |
| F3_9-C2_9-C1_9 | 112(2)    |
| F1_9-C2_9-C1_9 | 111(3)    |
| F5_9-C3_9-F4_9 | 107(3)    |
| F5_9-C3_9-F6_9 | 108(3)    |
| F4_9-C3_9-F6_9 | 106(2)    |
| F5_9-C3_9-C1_9 | 112(3)    |
| F4_9-C3_9-C1_9 | 111(2)    |
| F6_9-C3_9-C1_9 | 111(2)    |
| F9_9-C4_9-F8_9 | 108(3)    |
| F9_9-C4_9-F7_9 | 105(3)    |
| F8_9-C4_9-F7_9 | 107(3)    |
| F9_9-C4_9-C1_9 | 112(2)    |
| F8_9-C4_9-C1_9 | 112(3)    |
| F7_9-C4_9-C1_9 | 112(2)    |

---

Table S13: Atomic coordinates and  $U_{eq}$  [ $\text{\AA}^2$ ] for  $[\text{Fe}(\text{CO})_5][\text{F}-\{\text{Al}(\text{OR}^{\text{F}})_3\}_2]$  (**2**).

| Atom | x          | y          | z           | $U_{eq}$    |
|------|------------|------------|-------------|-------------|
| Al1  | 0.61602(8) | 1.11426(8) | 0.55902(4)  | 0.01544(18) |
| F1   | 0.500000   | 1.000000   | 0.500000    | 0.0197(5)   |
| Fe1  | 0.03780(5) | 0.66341(4) | 0.74227(2)  | 0.02417(11) |
| C1   | -0.0186(3) | 0.7812(3)  | 0.79862(16) | 0.0244(7)   |
| Al2  | 0.47579(8) | 0.34563(8) | -0.00130(4) | 0.01541(18) |
| F2   | 0.500000   | 0.500000   | 0.000000    | 0.0190(5)   |
| O2   | 0.2419(3)  | 0.8542(3)  | 0.72789(15) | 0.0516(8)   |
| C2   | 0.1646(4)  | 0.7831(4)  | 0.73224(18) | 0.0357(9)   |
| O1   | -0.0516(2) | 0.8516(2)  | 0.83230(12) | 0.0295(5)   |
| O3   | 0.1624(3)  | 0.4799(3)  | 0.67147(19) | 0.0625(10)  |
| C3   | 0.1174(4)  | 0.5489(4)  | 0.6990(2)   | 0.0390(9)   |
| O4   | -0.0966(4) | 0.4732(3)  | 0.79388(16) | 0.0515(8)   |
| C4   | -0.0477(4) | 0.5452(3)  | 0.77430(19) | 0.0337(8)   |
| O5   | -0.1705(3) | 0.6467(3)  | 0.62011(14) | 0.0403(7)   |
| C5   | -0.0942(4) | 0.6550(3)  | 0.66595(18) | 0.0293(7)   |
| O1_1 | 0.6536(2)  | 1.0388(2)  | 0.61931(11) | 0.0240(5)   |
| C1_1 | 0.7391(3)  | 1.0372(3)  | 0.67550(15) | 0.0235(6)   |
| C2_1 | 0.8647(3)  | 0.9980(3)  | 0.65868(16) | 0.0263(7)   |
| F1_1 | 0.8356(2)  | 0.9103(2)  | 0.60526(11) | 0.0410(5)   |
| F2_1 | 0.9338(2)  | 0.9582(2)  | 0.70732(11) | 0.0347(5)   |
| F3_1 | 0.9410(2)  | 1.0887(2)  | 0.64851(12) | 0.0398(5)   |
| C3_1 | 0.7760(4)  | 1.1630(4)  | 0.72382(17) | 0.0372(9)   |
| F4_1 | 0.6815(3)  | 1.1842(3)  | 0.75340(12) | 0.0565(8)   |
| F5_1 | 0.7942(3)  | 1.2474(2)  | 0.69075(13) | 0.0500(7)   |
| F6_1 | 0.8846(2)  | 1.1746(2)  | 0.76978(11) | 0.0470(6)   |
| C4_1 | 0.6741(3)  | 0.9444(4)  | 0.70784(18) | 0.0343(8)   |
| F7_1 | 0.5526(2)  | 0.9559(3)  | 0.70706(12) | 0.0456(6)   |
| F8_1 | 0.7383(2)  | 0.9580(3)  | 0.77027(11) | 0.0487(7)   |
| F9_1 | 0.6716(2)  | 0.8325(2)  | 0.67556(13) | 0.0443(6)   |
| O1_2 | 0.5527(4)  | 1.2395(4)  | 0.5780(2)   | 0.0230(9)   |
| C1_2 | 0.4584(4)  | 1.2987(3)  | 0.59446(18) | 0.0201(7)   |
| C2_2 | 0.3410(4)  | 1.2709(4)  | 0.53423(19) | 0.0297(8)   |
| F1_2 | 0.3818(4)  | 1.2740(5)  | 0.47963(16) | 0.0390(10)  |
| F2_2 | 0.2608(4)  | 1.3487(5)  | 0.5399(2)   | 0.0444(11)  |
| F3_2 | 0.2740(3)  | 1.1613(3)  | 0.52663(15) | 0.0427(8)   |
| C3_2 | 0.4143(4)  | 1.2600(3)  | 0.65347(18) | 0.0261(7)   |
| F4_2 | 0.4973(5)  | 1.3141(5)  | 0.7096(2)   | 0.0387(11)  |
| F5_2 | 0.4070(3)  | 1.1429(3)  | 0.64720(16) | 0.0348(8)   |
| F6_2 | 0.2978(3)  | 1.2855(3)  | 0.65788(15) | 0.0370(7)   |
| C4_2 | 0.5161(4)  | 1.4353(3)  | 0.61498(19) | 0.0289(8)   |
| F7_2 | 0.6332(3)  | 1.4575(3)  | 0.65435(19) | 0.0378(8)   |
| F8_2 | 0.4418(3)  | 1.4979(2)  | 0.64592(15) | 0.0424(7)   |
| F9_2 | 0.5261(3)  | 1.4777(2)  | 0.56240(13) | 0.0365(7)   |
| O1_3 | 0.7419(5)  | 1.1423(5)  | 0.5229(3)   | 0.0220(8)   |
| C1_3 | 0.8052(4)  | 1.2157(4)  | 0.4925(2)   | 0.0245(8)   |
| C2_3 | 0.7135(4)  | 1.2829(4)  | 0.4538(2)   | 0.0331(9)   |
| F1_3 | 0.6017(4)  | 1.2113(6)  | 0.4246(3)   | 0.0585(13)  |
| F2_3 | 0.7636(5)  | 1.3236(4)  | 0.4077(2)   | 0.0459(12)  |
| F3_3 | 0.6921(4)  | 1.3786(3)  | 0.4934(2)   | 0.0517(10)  |
| C3_3 | 0.9152(4)  | 1.3067(4)  | 0.5449(2)   | 0.0443(10)  |
| F4_3 | 1.0098(3)  | 1.2555(4)  | 0.5692(2)   | 0.0704(13)  |
| F5_3 | 0.8661(8)  | 1.3577(7)  | 0.5952(2)   | 0.0666(15)  |
| F6_3 | 0.9655(4)  | 1.3955(4)  | 0.5212(2)   | 0.0630(11)  |
| C4_3 | 0.8649(5)  | 1.1353(5)  | 0.4435(3)   | 0.0447(10)  |



|      |             |              |              |            |
|------|-------------|--------------|--------------|------------|
| F7_3 | 0.9243(6)   | 1.0602(4)    | 0.4733(3)    | 0.0737(16) |
| F8_3 | 0.9511(4)   | 1.1985(4)    | 0.4207(2)    | 0.0571(12) |
| F9_3 | 0.7743(5)   | 1.0727(3)    | 0.39152(16)  | 0.0667(11) |
| O1_4 | 0.4132(2)   | 0.3326(2)    | 0.06499(11)  | 0.0215(5)  |
| C1_4 | 0.4361(3)   | 0.3134(3)    | 0.12659(15)  | 0.0217(6)  |
| C2_4 | 0.5734(4)   | 0.3788(4)    | 0.16764(18)  | 0.0377(9)  |
| F1_4 | 0.6638(2)   | 0.3141(3)    | 0.15365(11)  | 0.0458(6)  |
| F2_4 | 0.5835(2)   | 0.3959(3)    | 0.23236(11)  | 0.0584(8)  |
| F3_4 | 0.6045(2)   | 0.4836(2)    | 0.15412(13)  | 0.0495(6)  |
| C3_4 | 0.3335(3)   | 0.3656(3)    | 0.16069(17)  | 0.0286(7)  |
| F4_4 | 0.21690(19) | 0.33537(19)  | 0.11982(10)  | 0.0309(4)  |
| F5_4 | 0.3640(2)   | 0.48434(19)  | 0.17943(12)  | 0.0418(6)  |
| F6_4 | 0.3248(2)   | 0.3233(2)    | 0.21434(10)  | 0.0360(5)  |
| C4_4 | 0.4226(3)   | 0.1782(3)    | 0.12350(17)  | 0.0301(7)  |
| F7_4 | 0.2963(2)   | 0.12495(19)  | 0.10500(11)  | 0.0361(5)  |
| F8_4 | 0.4736(2)   | 0.1559(2)    | 0.18119(11)  | 0.0436(6)  |
| F9_4 | 0.4819(2)   | 0.1261(2)    | 0.07963(11)  | 0.0383(5)  |
| O1_5 | 0.3625(2)   | 0.29349(19)  | -0.07470(11) | 0.0209(4)  |
| C1_5 | 0.2740(3)   | 0.1969(3)    | -0.11258(15) | 0.0203(6)  |
| C2_5 | 0.2353(3)   | 0.2189(3)    | -0.18302(17) | 0.0307(7)  |
| F1_5 | 0.1603(2)   | 0.3013(2)    | -0.18470(12) | 0.0405(5)  |
| F2_5 | 0.1717(2)   | 0.1187(2)    | -0.22706(10) | 0.0431(6)  |
| F3_5 | 0.3414(2)   | 0.2582(2)    | -0.20170(10) | 0.0374(5)  |
| C3_5 | 0.3313(3)   | 0.0806(3)    | -0.11591(17) | 0.0264(7)  |
| F4_5 | 0.4022(2)   | 0.08228(18)  | -0.05690(11) | 0.0329(5)  |
| F5_5 | 0.4076(2)   | 0.0717(2)    | -0.15785(11) | 0.0377(5)  |
| F6_5 | 0.2391(2)   | -0.01952(18) | -0.13519(11) | 0.0348(5)  |
| C4_5 | 0.1511(3)   | 0.1833(3)    | -0.08399(17) | 0.0279(7)  |
| F7_5 | 0.1754(2)   | 0.1374(2)    | -0.03149(11) | 0.0355(5)  |
| F8_5 | 0.04925(19) | 0.1105(2)    | -0.12757(11) | 0.0369(5)  |
| F9_5 | 0.1185(2)   | 0.2888(2)    | -0.06570(13) | 0.0414(6)  |
| O1_6 | 0.6284(10)  | 0.3091(16)   | 0.0094(8)    | 0.022(3)   |
| C1_6 | 0.7399(7)   | 0.3028(6)    | -0.0109(3)   | 0.0193(15) |
| C2_6 | 0.7485(5)   | 0.1694(4)    | -0.0356(3)   | 0.0261(11) |
| F1_6 | 0.7096(11)  | 0.1053(9)    | 0.0044(6)    | 0.042(3)   |
| F2_6 | 0.8685(4)   | 0.1547(5)    | -0.0378(3)   | 0.0387(11) |
| F3_6 | 0.6725(8)   | 0.1245(5)    | -0.0967(3)   | 0.0344(14) |
| C3_6 | 0.7435(4)   | 0.3685(4)    | -0.0673(2)   | 0.0233(10) |
| F4_6 | 0.7676(8)   | 0.4863(5)    | -0.0430(3)   | 0.0313(12) |
| F5_6 | 0.6295(11)  | 0.3391(11)   | -0.1105(7)   | 0.0316(19) |
| F6_6 | 0.8354(7)   | 0.3418(5)    | -0.0986(5)   | 0.0307(13) |
| C4_6 | 0.8554(4)   | 0.3629(5)    | 0.0489(2)    | 0.0249(11) |
| F7_6 | 0.8308(16)  | 0.4639(11)   | 0.0825(5)    | 0.037(2)   |
| F8_6 | 0.9658(5)   | 0.3872(6)    | 0.0316(4)    | 0.0382(14) |
| F9_6 | 0.8730(7)   | 0.2914(5)    | 0.0905(3)    | 0.0360(14) |
| O1_7 | 0.6170(19)  | 0.298(3)     | 0.0037(16)   | 0.016(4)   |
| C1_7 | 0.7346(13)  | 0.2977(9)    | -0.0111(5)   | 0.018(3)   |
| C2_7 | 0.8001(8)   | 0.2042(8)    | 0.0200(4)    | 0.0241(19) |
| F1_7 | 0.8477(14)  | 0.2468(10)   | 0.0845(5)    | 0.035(3)   |
| F2_7 | 0.9002(8)   | 0.1790(9)    | -0.0052(5)   | 0.035(2)   |
| F3_7 | 0.7147(15)  | 0.1031(14)   | 0.0079(11)   | 0.026(4)   |
| C3_7 | 0.7167(8)   | 0.2645(8)    | -0.0869(4)   | 0.0250(19) |
| F4_7 | 0.625(2)    | 0.316(2)     | -0.1156(14)  | 0.035(4)   |
| F5_7 | 0.6817(18)  | 0.1469(10)   | -0.1113(6)   | 0.041(3)   |
| F6_7 | 0.8258(14)  | 0.2984(11)   | -0.1045(9)   | 0.035(3)   |
| C4_7 | 0.8192(8)   | 0.4249(7)    | 0.0182(4)    | 0.0241(19) |
| F7_7 | 0.7823(14)  | 0.5004(10)   | -0.0180(5)   | 0.032(2)   |

|      |            |            |            |          |
|------|------------|------------|------------|----------|
| F8_7 | 0.9447(9)  | 0.4225(11) | 0.0206(7)  | 0.034(2) |
| F9_7 | 0.810(3)   | 0.4690(18) | 0.0794(8)  | 0.034(4) |
| O1_8 | 0.732(4)   | 1.153(3)   | 0.5241(19) | 0.033(4) |
| C1_8 | 0.7893(17) | 1.2237(16) | 0.4899(9)  | 0.035(3) |
| C2_8 | 0.8219(18) | 1.3559(15) | 0.5311(9)  | 0.046(3) |
| F1_8 | 0.7141(19) | 1.4014(19) | 0.5279(12) | 0.053(4) |
| F2_8 | 0.901(2)   | 1.4245(18) | 0.5070(12) | 0.056(5) |
| F3_8 | 0.877(4)   | 1.365(4)   | 0.5940(11) | 0.059(6) |
| C3_8 | 0.9147(17) | 1.1794(17) | 0.4783(10) | 0.048(3) |
| F4_8 | 0.895(3)   | 1.0613(17) | 0.4531(13) | 0.049(5) |
| F5_8 | 1.001(2)   | 1.204(2)   | 0.5366(10) | 0.061(5) |
| F6_8 | 0.977(3)   | 1.2417(19) | 0.4443(11) | 0.046(5) |
| C4_8 | 0.6908(18) | 1.2114(16) | 0.4234(8)  | 0.036(3) |
| F7_8 | 0.686(2)   | 1.1066(14) | 0.3830(8)  | 0.049(4) |
| F8_8 | 0.726(3)   | 1.297(2)   | 0.3939(14) | 0.040(5) |
| F9_8 | 0.574(2)   | 1.219(4)   | 0.4317(15) | 0.046(5) |
| O1_9 | 0.529(3)   | 1.223(3)   | 0.5722(18) | 0.026(4) |
| C1_9 | 0.4388(18) | 1.2801(15) | 0.5959(8)  | 0.028(3) |
| C2_9 | 0.5041(17) | 1.3688(16) | 0.6628(9)  | 0.036(3) |
| F1_9 | 0.517(4)   | 1.316(3)   | 0.7129(13) | 0.034(5) |
| F2_9 | 0.434(2)   | 1.4527(19) | 0.6762(11) | 0.050(5) |
| F3_9 | 0.623(2)   | 1.424(2)   | 0.6638(15) | 0.043(5) |
| C3_9 | 0.3784(19) | 1.3474(18) | 0.5447(9)  | 0.035(3) |
| F4_9 | 0.349(3)   | 1.277(3)   | 0.4840(11) | 0.039(5) |
| F5_9 | 0.458(2)   | 1.4458(18) | 0.5457(13) | 0.052(5) |
| F6_9 | 0.269(2)   | 1.379(3)   | 0.5567(15) | 0.034(5) |
| C4_9 | 0.3299(17) | 1.1838(15) | 0.6035(8)  | 0.033(3) |
| F7_9 | 0.257(2)   | 1.127(2)   | 0.5438(9)  | 0.044(5) |
| F8_9 | 0.254(2)   | 1.229(2)   | 0.6400(11) | 0.046(5) |
| F9_9 | 0.380(2)   | 1.1020(19) | 0.6304(13) | 0.042(5) |

$U_{eq}$  is defined as 1/3 of the trace of the orthogonalized  $U_j$  tensor.

Table S14: Bond lengths and angles for  $[\text{Fe}(\text{CO})_5][\text{F}-\{\text{Al}(\text{OR}^{\text{F}})_3\}_2]$ .

| Atom-Atom | Length [Å] |           |          |
|-----------|------------|-----------|----------|
| Al1-O1_8  | 1.63(3)    | O1_1-C1_1 | 1.358(4) |
| Al1-O1_9  | 1.68(2)    | C1_1-C3_1 | 1.552(5) |
| Al1-O1_2  | 1.693(4)   | C1_1-C4_1 | 1.553(5) |
| Al1-O1_1  | 1.709(2)   | C1_1-C2_1 | 1.563(4) |
| Al1-O1_3  | 1.712(4)   | C2_1-F1_1 | 1.315(4) |
| Al1-F1    | 1.7664(10) | C2_1-F3_1 | 1.323(4) |
| Fe1-C3    | 1.864(4)   | C2_1-F2_1 | 1.346(4) |
| Fe1-C4    | 1.864(4)   | C3_1-F4_1 | 1.324(5) |
| Fe1-C1    | 1.880(4)   | C3_1-F6_1 | 1.331(4) |
| Fe1-C2    | 1.881(4)   | C3_1-F5_1 | 1.332(5) |
| Fe1-C5    | 1.903(4)   | C4_1-F7_1 | 1.325(4) |
| C1-O1     | 1.119(4)   | C4_1-F9_1 | 1.332(5) |
| Al2-O1_7  | 1.67(2)    | C4_1-F8_1 | 1.336(4) |
| Al2-O1_4  | 1.711(2)   | O1_2-C1_2 | 1.361(4) |
| Al2-O1_5  | 1.713(2)   | C1_2-C2_2 | 1.549(5) |
| Al2-O1_6  | 1.726(11)  | C1_2-C4_2 | 1.554(5) |
| Al2-F2    | 1.7636(11) | C1_2-C3_2 | 1.558(5) |
| O2-C2     | 1.118(5)   | C2_2-F3_2 | 1.331(5) |
| O3-C3     | 1.116(5)   | C2_2-F2_2 | 1.331(5) |
| O4-C4     | 1.120(5)   | C2_2-F1_2 | 1.332(5) |
| O5-C5     | 1.118(4)   | C3_2-F4_2 | 1.315(6) |
|           |            | C3_2-F5_2 | 1.324(5) |



|                |            |                |          |
|----------------|------------|----------------|----------|
| C4-Fe1-C5      | 98.20(17)  | F4_2-C3_2-C1_2 | 111.1(4) |
| C1-Fe1-C5      | 95.87(15)  | F5_2-C3_2-C1_2 | 110.5(3) |
| C2-Fe1-C5      | 99.31(17)  | F6_2-C3_2-C1_2 | 112.1(3) |
| O1-C1-Fe1      | 179.7(4)   | F7_2-C4_2-F9_2 | 107.4(4) |
| O1_4-Al2-O1_5  | 112.72(12) | F7_2-C4_2-F8_2 | 108.0(3) |
| O1_4-Al2-O1_6  | 110.5(5)   | F9_2-C4_2-F8_2 | 107.4(3) |
| O1_5-Al2-O1_6  | 121.5(6)   | F7_2-C4_2-C1_2 | 111.4(3) |
| O1_7-Al2-F2    | 109.7(10)  | F9_2-C4_2-C1_2 | 110.8(3) |
| O1_4-Al2-F2    | 105.72(9)  | F8_2-C4_2-C1_2 | 111.7(3) |
| O1_5-Al2-F2    | 98.78(9)   | C1_3-O1_3-Al1  | 147.7(4) |
| O1_6-Al2-F2    | 105.4(6)   | O1_3-C1_3-C2_3 | 112.4(4) |
| Al2-F2-Al2     | 180.0      | O1_3-C1_3-C3_3 | 109.0(4) |
| O2-C2-Fe1      | 178.1(4)   | C2_3-C1_3-C3_3 | 110.1(4) |
| O3-C3-Fe1      | 178.0(4)   | O1_3-C1_3-C4_3 | 107.1(4) |
| O4-C4-Fe1      | 178.5(4)   | C2_3-C1_3-C4_3 | 108.7(4) |
| O5-C5-Fe1      | 177.7(3)   | C3_3-C1_3-C4_3 | 109.4(4) |
| C1_1-O1_1-Al1  | 145.7(2)   | F1_3-C2_3-F3_3 | 108.6(4) |
| O1_1-C1_1-C3_1 | 110.9(3)   | F1_3-C2_3-F2_3 | 108.5(4) |
| O1_1-C1_1-C4_1 | 107.9(3)   | F3_3-C2_3-F2_3 | 106.3(4) |
| C3_1-C1_1-C4_1 | 109.9(3)   | F1_3-C2_3-C1_3 | 110.0(4) |
| O1_1-C1_1-C2_1 | 109.7(3)   | F3_3-C2_3-C1_3 | 111.2(4) |
| C3_1-C1_1-C2_1 | 109.1(3)   | F2_3-C2_3-C1_3 | 112.1(4) |
| C4_1-C1_1-C2_1 | 109.3(3)   | F4_3-C3_3-F6_3 | 108.1(4) |
| F1_1-C2_1-F3_1 | 108.1(3)   | F4_3-C3_3-F5_3 | 108.0(5) |
| F1_1-C2_1-F2_1 | 107.1(3)   | F6_3-C3_3-F5_3 | 107.0(5) |
| F3_1-C2_1-F2_1 | 107.7(3)   | F4_3-C3_3-C1_3 | 112.2(4) |
| F1_1-C2_1-C1_1 | 110.8(3)   | F6_3-C3_3-C1_3 | 112.3(4) |
| F3_1-C2_1-C1_1 | 110.9(3)   | F5_3-C3_3-C1_3 | 109.0(5) |
| F2_1-C2_1-C1_1 | 112.1(3)   | F9_3-C4_3-F8_3 | 106.3(4) |
| F4_1-C3_1-F6_1 | 108.5(3)   | F9_3-C4_3-F7_3 | 109.2(5) |
| F4_1-C3_1-F5_1 | 107.7(3)   | F8_3-C4_3-F7_3 | 108.0(5) |
| F6_1-C3_1-F5_1 | 107.7(3)   | F9_3-C4_3-C1_3 | 110.9(4) |
| F4_1-C3_1-C1_1 | 110.6(3)   | F8_3-C4_3-C1_3 | 112.8(4) |
| F6_1-C3_1-C1_1 | 112.4(3)   | F7_3-C4_3-C1_3 | 109.6(4) |
| F5_1-C3_1-C1_1 | 109.8(3)   | C1_4-O1_4-Al2  | 146.2(2) |
| F7_1-C4_1-F9_1 | 107.3(3)   | O1_4-C1_4-C4_4 | 110.4(3) |
| F7_1-C4_1-F8_1 | 108.4(3)   | O1_4-C1_4-C2_4 | 111.2(3) |
| F9_1-C4_1-F8_1 | 107.8(3)   | C4_4-C1_4-C2_4 | 109.4(3) |
| F7_1-C4_1-C1_1 | 110.9(3)   | O1_4-C1_4-C3_4 | 107.4(3) |
| F9_1-C4_1-C1_1 | 111.0(3)   | C4_4-C1_4-C3_4 | 109.7(3) |
| F8_1-C4_1-C1_1 | 111.2(3)   | C2_4-C1_4-C3_4 | 108.6(3) |
| C1_2-O1_2-Al1  | 153.2(4)   | F3_4-C2_4-F2_4 | 108.7(3) |
| O1_2-C1_2-C2_2 | 109.3(3)   | F3_4-C2_4-F1_4 | 106.9(3) |
| O1_2-C1_2-C4_2 | 107.7(3)   | F2_4-C2_4-F1_4 | 106.7(3) |
| C2_2-C1_2-C4_2 | 110.4(3)   | F3_4-C2_4-C1_4 | 111.1(3) |
| O1_2-C1_2-C3_2 | 110.7(3)   | F2_4-C2_4-C1_4 | 112.3(3) |
| C2_2-C1_2-C3_2 | 109.7(3)   | F1_4-C2_4-C1_4 | 110.8(3) |
| C4_2-C1_2-C3_2 | 109.0(3)   | F4_4-C3_4-F5_4 | 108.5(3) |
| F3_2-C2_2-F2_2 | 108.2(4)   | F4_4-C3_4-F6_4 | 107.2(3) |
| F3_2-C2_2-F1_2 | 108.0(4)   | F5_4-C3_4-F6_4 | 108.0(3) |
| F2_2-C2_2-F1_2 | 107.7(4)   | F4_4-C3_4-C1_4 | 110.5(3) |
| F3_2-C2_2-C1_2 | 109.9(3)   | F5_4-C3_4-C1_4 | 110.7(3) |
| F2_2-C2_2-C1_2 | 112.7(4)   | F6_4-C3_4-C1_4 | 111.8(3) |
| F1_2-C2_2-C1_2 | 110.2(3)   | F9_4-C4_4-F8_4 | 107.7(3) |
| F4_2-C3_2-F5_2 | 107.4(4)   | F9_4-C4_4-F7_4 | 107.8(3) |
| F4_2-C3_2-F6_2 | 107.7(4)   | F8_4-C4_4-F7_4 | 107.8(3) |
| F5_2-C3_2-F6_2 | 107.7(3)   | F9_4-C4_4-C1_4 | 110.4(3) |

|                |           |                |           |
|----------------|-----------|----------------|-----------|
| F8_4-C4_4-C1_4 | 112.5(3)  | C3_7-C1_7-C4_7 | 109.6(8)  |
| F7_4-C4_4-C1_4 | 110.4(3)  | C2_7-C1_7-C4_7 | 109.9(8)  |
| C1_5-O1_5-AI2  | 143.8(2)  | F3_7-C2_7-F1_7 | 110.4(12) |
| O1_5-C1_5-C3_5 | 111.0(2)  | F3_7-C2_7-F2_7 | 108.2(11) |
| O1_5-C1_5-C2_5 | 107.5(3)  | F1_7-C2_7-F2_7 | 106.5(9)  |
| C3_5-C1_5-C2_5 | 109.6(3)  | F3_7-C2_7-C1_7 | 109.6(10) |
| O1_5-C1_5-C4_5 | 110.0(2)  | F1_7-C2_7-C1_7 | 110.8(9)  |
| C3_5-C1_5-C4_5 | 109.3(3)  | F2_7-C2_7-C1_7 | 111.2(8)  |
| C2_5-C1_5-C4_5 | 109.4(3)  | F5_7-C3_7-F4_7 | 107.8(14) |
| F1_5-C2_5-F2_5 | 108.1(3)  | F5_7-C3_7-F6_7 | 106.7(10) |
| F1_5-C2_5-F3_5 | 107.8(3)  | F4_7-C3_7-F6_7 | 108.5(15) |
| F2_5-C2_5-F3_5 | 108.0(3)  | F5_7-C3_7-C1_7 | 111.4(8)  |
| F1_5-C2_5-C1_5 | 111.3(3)  | F4_7-C3_7-C1_7 | 110.2(14) |
| F2_5-C2_5-C1_5 | 111.7(3)  | F6_7-C3_7-C1_7 | 112.1(10) |
| F3_5-C2_5-C1_5 | 109.9(3)  | F7_7-C4_7-F9_7 | 108.1(12) |
| F4_5-C3_5-F5_5 | 108.0(3)  | F7_7-C4_7-F8_7 | 108.2(10) |
| F4_5-C3_5-F6_5 | 108.1(3)  | F9_7-C4_7-F8_7 | 107.2(14) |
| F5_5-C3_5-F6_5 | 107.4(3)  | F7_7-C4_7-C1_7 | 110.7(8)  |
| F4_5-C3_5-C1_5 | 109.4(3)  | F9_7-C4_7-C1_7 | 111.3(12) |
| F5_5-C3_5-C1_5 | 111.1(3)  | F8_7-C4_7-C1_7 | 111.2(9)  |
| F6_5-C3_5-C1_5 | 112.7(3)  | C1_8-O1_8-AI1  | 152(3)    |
| F9_5-C4_5-F7_5 | 108.1(3)  | O1_8-C1_8-C3_8 | 108.6(17) |
| F9_5-C4_5-F8_5 | 108.2(3)  | O1_8-C1_8-C4_8 | 107.4(18) |
| F7_5-C4_5-F8_5 | 107.6(3)  | C3_8-C1_8-C4_8 | 110.9(12) |
| F9_5-C4_5-C1_5 | 110.7(3)  | O1_8-C1_8-C2_8 | 108.7(18) |
| F7_5-C4_5-C1_5 | 109.9(3)  | C3_8-C1_8-C2_8 | 110.5(12) |
| F8_5-C4_5-C1_5 | 112.2(3)  | C4_8-C1_8-C2_8 | 110.7(12) |
| C1_6-O1_6-AI2  | 149.9(13) | F3_8-C2_8-F1_8 | 108.5(19) |
| O1_6-C1_6-C2_6 | 109.4(9)  | F3_8-C2_8-F2_8 | 109(2)    |
| O1_6-C1_6-C4_6 | 108.0(8)  | F1_8-C2_8-F2_8 | 106.5(16) |
| C2_6-C1_6-C4_6 | 109.5(5)  | F3_8-C2_8-C1_8 | 112.3(19) |
| O1_6-C1_6-C3_6 | 110.4(9)  | F1_8-C2_8-C1_8 | 109.7(14) |
| C2_6-C1_6-C3_6 | 109.5(5)  | F2_8-C2_8-C1_8 | 111.1(14) |
| C4_6-C1_6-C3_6 | 110.0(5)  | F6_8-C3_8-F4_8 | 112.4(17) |
| F2_6-C2_6-F1_6 | 107.8(7)  | F6_8-C3_8-F5_8 | 102.0(16) |
| F2_6-C2_6-F3_6 | 107.5(5)  | F4_8-C3_8-F5_8 | 108.0(17) |
| F1_6-C2_6-F3_6 | 108.8(7)  | F6_8-C3_8-C1_8 | 113.2(15) |
| F2_6-C2_6-C1_6 | 112.4(5)  | F4_8-C3_8-C1_8 | 112.6(16) |
| F1_6-C2_6-C1_6 | 109.9(7)  | F5_8-C3_8-C1_8 | 108.0(14) |
| F3_6-C2_6-C1_6 | 110.4(5)  | F9_8-C4_8-F7_8 | 108.9(18) |
| F5_6-C3_6-F4_6 | 108.3(7)  | F9_8-C4_8-F8_8 | 107.7(18) |
| F5_6-C3_6-F6_6 | 108.9(8)  | F7_8-C4_8-F8_8 | 107.5(17) |
| F4_6-C3_6-F6_6 | 107.8(5)  | F9_8-C4_8-C1_8 | 111.7(16) |
| F5_6-C3_6-C1_6 | 109.8(7)  | F7_8-C4_8-C1_8 | 110.0(14) |
| F4_6-C3_6-C1_6 | 109.8(5)  | F8_8-C4_8-C1_8 | 111.0(15) |
| F6_6-C3_6-C1_6 | 112.2(5)  | C1_9-O1_9-AI1  | 157(3)    |
| F8_6-C4_6-F7_6 | 109.0(8)  | O1_9-C1_9-C2_9 | 109.8(17) |
| F8_6-C4_6-F9_6 | 107.4(5)  | O1_9-C1_9-C3_9 | 108.2(17) |
| F7_6-C4_6-F9_6 | 106.6(7)  | C2_9-C1_9-C3_9 | 110.8(12) |
| F8_6-C4_6-C1_6 | 112.7(5)  | O1_9-C1_9-C4_9 | 108.5(16) |
| F7_6-C4_6-C1_6 | 110.3(7)  | C2_9-C1_9-C4_9 | 110.8(12) |
| F9_6-C4_6-C1_6 | 110.6(5)  | C3_9-C1_9-C4_9 | 108.7(12) |
| C1_7-O1_7-AI2  | 152(2)    | F2_9-C2_9-F1_9 | 106.2(19) |
| O1_7-C1_7-C3_7 | 109.9(15) | F2_9-C2_9-F3_9 | 107.9(17) |
| O1_7-C1_7-C2_7 | 108.3(15) | F1_9-C2_9-F3_9 | 106.5(18) |
| C3_7-C1_7-C2_7 | 110.1(8)  | F2_9-C2_9-C1_9 | 111.0(14) |
| O1_7-C1_7-C4_7 | 108.9(15) | F1_9-C2_9-C1_9 | 112.9(16) |

|                |           |
|----------------|-----------|
| F3_9-C2_9-C1_9 | 112.0(16) |
| F5_9-C3_9-F6_9 | 108.0(18) |
| F5_9-C3_9-F4_9 | 108.2(18) |
| F6_9-C3_9-F4_9 | 107.4(17) |
| F5_9-C3_9-C1_9 | 111.9(14) |
| F6_9-C3_9-C1_9 | 110.5(16) |
| F4_9-C3_9-C1_9 | 110.7(17) |
| F8_9-C4_9-F9_9 | 107.5(17) |
| F8_9-C4_9-F7_9 | 108.9(16) |
| F9_9-C4_9-F7_9 | 106.9(17) |
| F8_9-C4_9-C1_9 | 113.7(15) |
| F9_9-C4_9-C1_9 | 110.7(15) |
| F7_9-C4_9-C1_9 | 108.9(14) |

Symmetry transformations used to generate equivalent atoms:

#1: 1-X, 2-Y, 1-Z; #2: 1-X, 1-Y, -Z;

## 7 Quantum Chemical Calculations

Table S15: SCF Energy, FreeH energy and FreeH entropy of presented compounds.

| Compound                                                                                               | SCF/ Hartree    | FreeH energy [kJ/mol] | FreeH entropy [kJ/mol] |
|--------------------------------------------------------------------------------------------------------|-----------------|-----------------------|------------------------|
| [Fe(CO) <sub>5</sub> ] <sup>•+</sup> in C <sub>4v</sub>                                                | -1830.743371438 | 139.87                | 0.45513                |
| [Fe(CO) <sub>5</sub> ] <sup>•+</sup> in C <sub>2v</sub>                                                | -1830.101932301 | 138.04                | 0.46378                |
| [Fe(CO) <sub>5</sub> ] <sup>•+</sup> in C <sub>4v</sub><br>with <sup>13</sup> C axial isotope          | -1830.743371446 | 139.47                | 0.45575                |
| [Fe(CO) <sub>5</sub> ] <sup>•+</sup> in C <sub>4v</sub><br>with one <sup>13</sup> C equatorial isotope | -1830.743364605 | 139.44                | 0.46732                |
| [Fe(CO) <sub>5</sub> ] <sup>•+</sup> in presence of -0.3e point charges                                | -1831.238180570 | 139.91                | 0.46572                |

Graphic of [Fe(CO)<sub>5</sub>]<sup>•+</sup>:

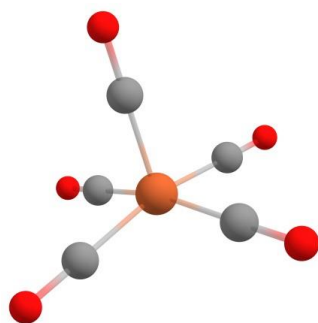

Table S16: Atom coordinates of [Fe(CO)<sub>5</sub>]<sup>•+</sup> in C<sub>4v</sub>.

|                     |                     |                   |    |
|---------------------|---------------------|-------------------|----|
| 0.0000000000000000  | 0.0000000000000000  | 0.47188976815579  | fe |
| 0.0000000000000000  | 3.48329789506462    | 0.85796673993665  | c  |
| -0.0000000000000000 | 5.62170246988202    | 1.07446652659246  | o  |
| 0.0000000000000000  | -3.48329789506462   | 0.85796673993665  | c  |
| 0.0000000000000000  | -5.62170246988202   | 1.07446652659246  | o  |
| 3.48329789506462    | -0.0000000000000000 | 0.85796673993665  | c  |
| 5.62170246988202    | 0.0000000000000000  | 1.07446652659246  | o  |
| -3.48329789506462   | -0.0000000000000000 | 0.85796673993665  | c  |
| -5.62170246988202   | -0.0000000000000000 | 1.07446652659246  | o  |
| 0.0000000000000000  | 0.0000000000000000  | -3.03926623750873 | c  |
| 0.0000000000000000  | 0.0000000000000000  | -5.19051882009860 | o  |

Table S17: Vibrational spectrum of  $[\text{Fe}(\text{CO})_5]^{*+}$  in  $C_{4v}$ .

| #  | mode | symmetry | wave number            | IR intensity    | selection rules |       |
|----|------|----------|------------------------|-----------------|-----------------|-------|
| #  |      |          | $\text{cm}^{*-1}$ (-1) | $\text{km/mol}$ | IR              | RAMAN |
| 1  |      |          | -0.00                  | 0.00000         | -               | -     |
| 2  |      |          | -0.00                  | 0.00000         | -               | -     |
| 3  |      |          | -0.00                  | 0.00000         | -               | -     |
| 4  |      |          | -0.00                  | 0.00000         | -               | -     |
| 5  |      |          | 0.00                   | 0.00000         | -               | -     |
| 6  |      |          | 0.00                   | 0.00000         | -               | -     |
| 7  |      | b1       | 45.93                  | 0.00000         | NO              | YES   |
| 8  |      | e        | 79.83                  | 0.03520         | YES             | YES   |
| 9  |      | e        | 79.83                  | 0.03520         | YES             | YES   |
| 10 |      | b2       | 95.73                  | 0.00000         | NO              | YES   |
| 11 |      | e        | 99.87                  | 1.27405         | YES             | YES   |
| 12 |      | e        | 99.87                  | 1.27405         | YES             | YES   |
| 13 |      | a1       | 103.88                 | 0.73251         | YES             | YES   |
| 14 |      | e        | 336.28                 | 0.01071         | YES             | YES   |
| 15 |      | e        | 336.28                 | 0.01071         | YES             | YES   |
| 16 |      | a2       | 354.81                 | 0.00000         | NO              | NO    |
| 17 |      | b1       | 375.92                 | 0.00000         | NO              | YES   |
| 18 |      | a1       | 388.25                 | 0.01765         | YES             | YES   |
| 19 |      | a1       | 421.81                 | 5.95980         | YES             | YES   |
| 20 |      | e        | 423.65                 | 14.44500        | YES             | YES   |
| 21 |      | e        | 423.65                 | 14.44500        | YES             | YES   |
| 22 |      | b1       | 429.07                 | 0.00000         | NO              | YES   |
| 23 |      | e        | 489.67                 | 1.66730         | YES             | YES   |
| 24 |      | e        | 489.67                 | 1.66730         | YES             | YES   |
| 25 |      | b2       | 530.86                 | 0.00000         | NO              | YES   |
| 26 |      | a1       | 604.83                 | 70.84663        | YES             | YES   |
| 27 |      | e        | 607.67                 | 88.40870        | YES             | YES   |
| 28 |      | e        | 607.67                 | 88.40870        | YES             | YES   |
| 29 |      | e        | 2101.94                | 855.45298       | YES             | YES   |
| 30 |      | e        | 2101.94                | 855.45298       | YES             | YES   |
| 31 |      | a1       | 2106.00                | 410.53214       | YES             | YES   |
| 32 |      | b1       | 2119.61                | 0.00000         | NO              | YES   |
| 33 |      | a1       | 2171.11                | 4.23665         | YES             | YES   |

Graphic of the transition state of  $[\text{Fe}(\text{CO})_5]^{*+}$  in  $C_{2v}$ :

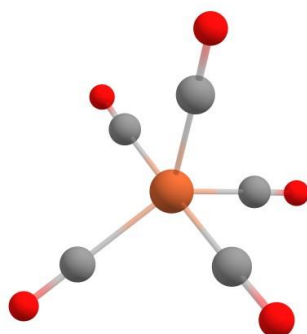



Table S18: Atom coordinates of the transition state of  $[\text{Fe}(\text{CO})_5]^{*+}$  in  $C_{2v}$ .

|                   |                   |                   |    |
|-------------------|-------------------|-------------------|----|
| 0.05231087658940  | 0.12251200946792  | -0.16682081776768 | fe |
| 0.97415348825330  | 0.49090210185250  | 3.27583325720406  | c  |
| 1.54434488285331  | 0.74384803595184  | 5.30728551089112  | o  |
| 0.96933404390281  | 2.25957329584900  | -3.10011195324520 | c  |
| 1.48838400698667  | 3.46906270890595  | -4.75714179453257 | o  |
| -2.84114180153247 | 2.09988934172146  | 0.42106792249854  | c  |
| -4.57954962800985 | 3.25563816802423  | 0.80578611597697  | o  |
| 2.92491732305575  | -1.90159243678696 | -0.69176205238501 | c  |
| 4.63023197158039  | -3.13396001285121 | -0.97265145406391 | o  |
| -1.97700675303327 | -2.82913533308322 | -0.06924606400843 | c  |
| -3.18597822167361 | -4.57673787905108 | -0.05223867056793 | o  |

Table S19: Vibrational spectrum of the transition state of  $[\text{Fe}(\text{CO})_5]^{*+}$  in  $C_{2v}$ .

| #  | mode | symmetry | wave number           | IR intensity | selection rules |       |
|----|------|----------|-----------------------|--------------|-----------------|-------|
| #  |      |          | cm <sup>**</sup> (-1) | km/mol       | IR              | RAMAN |
| 1  |      | a        | -244.40               | 0.00000      | YES             | YES   |
| 2  |      |          | -0.00                 | 0.00000      | -               | -     |
| 3  |      |          | 0.00                  | 0.00000      | -               | -     |
| 4  |      |          | 0.00                  | 0.00000      | -               | -     |
| 5  |      |          | 0.00                  | 0.00000      | -               | -     |
| 6  |      |          | 0.00                  | 0.00000      | -               | -     |
| 7  |      |          | 0.00                  | 0.00000      | -               | -     |
| 8  |      | a        | 69.69                 | 0.07723      | YES             | YES   |
| 9  |      | a        | 79.56                 | 0.78377      | YES             | YES   |
| 10 |      | a        | 84.45                 | 0.19928      | YES             | YES   |
| 11 |      | a        | 89.66                 | 0.00001      | YES             | YES   |
| 12 |      | a        | 100.02                | 1.12369      | YES             | YES   |
| 13 |      | a        | 104.79                | 0.89611      | YES             | YES   |
| 14 |      | a        | 138.53                | 0.33492      | YES             | YES   |
| 15 |      | a        | 302.53                | 2.07287      | YES             | YES   |
| 16 |      | a        | 305.39                | 0.01038      | YES             | YES   |
| 17 |      | a        | 321.57                | 0.43423      | YES             | YES   |
| 18 |      | a        | 337.81                | 0.00007      | YES             | YES   |
| 19 |      | a        | 361.49                | 14.71332     | YES             | YES   |
| 20 |      | a        | 370.65                | 0.05269      | YES             | YES   |
| 21 |      | a        | 387.04                | 6.28696      | YES             | YES   |
| 22 |      | a        | 393.72                | 12.59000     | YES             | YES   |
| 23 |      | a        | 454.83                | 0.69606      | YES             | YES   |
| 24 |      | a        | 504.05                | 22.36541     | YES             | YES   |
| 25 |      | a        | 522.57                | 0.00029      | YES             | YES   |
| 26 |      | a        | 548.22                | 56.98917     | YES             | YES   |
| 27 |      | a        | 555.65                | 30.99505     | YES             | YES   |
| 28 |      | a        | 594.17                | 61.05792     | YES             | YES   |
| 29 |      | a        | 2190.55               | 677.30629    | YES             | YES   |
| 30 |      | a        | 2204.57               | 886.90214    | YES             | YES   |
| 31 |      | a        | 2206.90               | 254.15155    | YES             | YES   |
| 32 |      | a        | 2232.58               | 339.90705    | YES             | YES   |
| 33 |      | a        | 2262.52               | 23.95940     | YES             | YES   |

Table S20: Atom coordinates of  $[\text{Fe}(\text{CO})_5]^{*+}$  with  $^{13}\text{C}$  axial isotope.

|                   |                   |                   |    |
|-------------------|-------------------|-------------------|----|
| -0.00073226887344 | 0.41233824047360  | -0.18569431561772 | fe |
| 0.02290423652537  | 2.41488460560895  | 2.69076364389802  | c  |
| 0.03777241270421  | 3.62457880055027  | 4.46730707927908  | o  |
| -0.02564377248878 | -0.91836759044348 | -3.42774001408301 | c  |
| -0.04081128128581 | -1.75496767632156 | -5.40753199797469 | o  |
| -3.48473396504020 | 0.75671210291658  | -0.34658389714616 | c  |
| -5.62353128454110 | 0.94968432075949  | -0.43595698244683 | o  |
| 3.48143374733552  | 0.74789653054349  | -0.39624438793009 | c  |
| 5.61920154404351  | 0.93585549394940  | -0.51583494985986 | o  |
| 0.00707211105018  | -2.67036631805007 | 1.49319997889826  | c  |
| 0.01175995464845  | -4.55971619857217 | 2.52189941812211  | o  |

Table S21: Vibrational spectrum of  $[\text{Fe}(\text{CO})_5]^{++}$  with  $^{13}\text{C}$  axial isotope.

| #  | mode | symmetry | wave number           | IR intensity | selection rules |       |
|----|------|----------|-----------------------|--------------|-----------------|-------|
| #  |      |          | cm <sup>**</sup> (-1) | km/mol       | IR              | RAMAN |
| 1  |      |          | -0.00                 | 0.00000      | -               | -     |
| 2  |      |          | 0.00                  | 0.00000      | -               | -     |
| 3  |      |          | 0.00                  | 0.00000      | -               | -     |
| 4  |      |          | 0.00                  | 0.00000      | -               | -     |
| 5  |      |          | 0.00                  | 0.00000      | -               | -     |
| 6  |      |          | 0.00                  | 0.00000      | -               | -     |
| 7  |      | b1       | 45.94                 | 0.00000      | NO              | YES   |
| 8  |      | e        | 79.70                 | 0.03851      | YES             | YES   |
| 9  |      | e        | 79.70                 | 0.03851      | YES             | YES   |
| 10 |      | b2       | 95.74                 | 0.00000      | NO              | YES   |
| 11 |      | e        | 99.87                 | 1.27531      | YES             | YES   |
| 12 |      | e        | 99.87                 | 1.27531      | YES             | YES   |
| 13 |      | a1       | 103.61                | 0.71299      | YES             | YES   |
| 14 |      | e        | 331.57                | 0.00434      | YES             | YES   |
| 15 |      | e        | 331.57                | 0.00434      | YES             | YES   |
| 16 |      | a2       | 354.81                | 0.00000      | NO              | NO    |
| 17 |      | b1       | 375.89                | 0.00000      | NO              | YES   |
| 18 |      | a1       | 385.82                | 0.07945      | YES             | YES   |
| 19 |      | a1       | 419.65                | 5.84798      | YES             | YES   |
| 20 |      | e        | 422.28                | 13.74194     | YES             | YES   |
| 21 |      | e        | 422.28                | 13.74194     | YES             | YES   |
| 22 |      | b1       | 429.08                | 0.00000      | NO              | YES   |
| 23 |      | e        | 482.61                | 2.53204      | YES             | YES   |
| 24 |      | e        | 482.61                | 2.53204      | YES             | YES   |
| 25 |      | b2       | 530.86                | 0.00000      | NO              | YES   |
| 26 |      | a1       | 604.78                | 70.74019     | YES             | YES   |
| 27 |      | e        | 606.97                | 87.97904     | YES             | YES   |
| 28 |      | e        | 606.97                | 87.97904     | YES             | YES   |
| 29 |      | a1       | 2061.25               | 370.76160    | YES             | YES   |
| 30 |      | e        | 2101.94               | 855.42801    | YES             | YES   |
| 31 |      | e        | 2101.94               | 855.42801    | YES             | YES   |
| 32 |      | b1       | 2119.61               | 0.00000      | NO              | YES   |
| 33 |      | a1       | 2168.25               | 23.87063     | YES             | YES   |

Table S22: Atom coordinates of  $[\text{Fe}(\text{CO})_5]^{++}$  with one  $^{13}\text{C}$  equatorial isotope

|                   |                   |                   |    |
|-------------------|-------------------|-------------------|----|
| -0.00073226887344 | 0.41233824047360  | -0.18569431561772 | fe |
| 0.02290423652537  | 2.41488460560895  | 2.69076364389802  | c  |
| 0.03777241270421  | 3.62457880055027  | 4.46730707927908  | o  |
| -0.02564377248878 | -0.91836759044348 | -3.42774001408301 | c  |
| -0.04081128128581 | -1.75496767632156 | -5.40753199797469 | o  |
| -3.48473396504020 | 0.75671210291658  | -0.34658389714616 | c  |
| -5.62353128454110 | 0.94968432075949  | -0.43595698244683 | o  |
| 3.48143374733552  | 0.74789653054349  | -0.39624438793009 | c  |
| 5.61920154404351  | 0.93585549394940  | -0.51583494985986 | o  |
| 0.00707211105018  | -2.67036631805007 | 1.49319997889826  | c  |
| 0.01175995464845  | -4.55971619857217 | 2.52189941812211  | o  |

Table S23: Vibrational spectrum of  $[\text{Fe}(\text{CO})_5]^{*+}$  with one  $^{13}\text{C}$  equatorial isotope.

| #  | mode | symmetry | wave number            | IR intensity    | selection rules |       |
|----|------|----------|------------------------|-----------------|-----------------|-------|
| #  |      |          | $\text{cm}^{*-1}$ (-1) | $\text{km/mol}$ | IR              | RAMAN |
| 1  |      |          | -0.00                  | 0.00000         | -               | -     |
| 2  |      |          | 0.00                   | 0.00000         | -               | -     |
| 3  |      |          | 0.00                   | 0.00000         | -               | -     |
| 4  |      |          | 0.00                   | 0.00000         | -               | -     |
| 5  |      |          | 0.00                   | 0.00000         | -               | -     |
| 6  |      |          | 0.00                   | 0.00000         | -               | -     |
| 7  |      | a        | 45.85                  | 0.00012         | YES             | YES   |
| 8  |      | a        | 79.71                  | 0.03240         | YES             | YES   |
| 9  |      | a        | 79.75                  | 0.03031         | YES             | YES   |
| 10 |      | a        | 95.44                  | 0.00058         | YES             | YES   |
| 11 |      | a        | 99.53                  | 1.25946         | YES             | YES   |
| 12 |      | a        | 99.71                  | 1.28306         | YES             | YES   |
| 13 |      | a        | 103.84                 | 0.73251         | YES             | YES   |
| 14 |      | a        | 333.14                 | 0.01217         | YES             | YES   |
| 15 |      | a        | 336.13                 | 0.01037         | YES             | YES   |
| 16 |      | a        | 351.52                 | 0.00208         | YES             | YES   |
| 17 |      | a        | 373.57                 | 0.01595         | YES             | YES   |
| 18 |      | a        | 387.53                 | 0.02000         | YES             | YES   |
| 19 |      | a        | 420.18                 | 7.01571         | YES             | YES   |
| 20 |      | a        | 421.79                 | 13.76880        | YES             | YES   |
| 21 |      | a        | 422.02                 | 12.62439        | YES             | YES   |
| 22 |      | a        | 426.44                 | 0.44547         | YES             | YES   |
| 23 |      | a        | 486.64                 | 1.88226         | YES             | YES   |
| 24 |      | a        | 488.38                 | 0.93034         | YES             | YES   |
| 25 |      | a        | 525.88                 | 0.51108         | YES             | YES   |
| 26 |      | a        | 601.30                 | 70.06879        | YES             | YES   |
| 27 |      | a        | 602.33                 | 88.31752        | YES             | YES   |
| 28 |      | a        | 607.21                 | 87.92519        | YES             | YES   |
| 29 |      | a        | 2065.25                | 624.86173       | YES             | YES   |
| 30 |      | a        | 2101.89                | 855.58079       | YES             | YES   |
| 31 |      | a        | 2105.79                | 432.22349       | YES             | YES   |
| 32 |      | a        | 2115.06                | 162.41488       | YES             | YES   |
| 33 |      | a        | 2164.25                | 23.13827        | YES             | YES   |

Graphic of  $[\text{Fe}(\text{CO})_5]^{*+}$  in presence of  $-0.3e$  point charges:

The position of the fluorine atoms and cation was obtained from the scXRD structure of  $[\text{Fe}(\text{CO})_5][\text{Al}(\text{OR}^f)_4]$  (**1**), representing the nearest contact point between the cation and the anion. A charge of  $-0.3e$  was chosen, due to calculations revealing this to be the partial negative charge typically residing in  $-\text{CF}_3$  groups of the aluminate anion (cf. related work<sup>[34]</sup>).

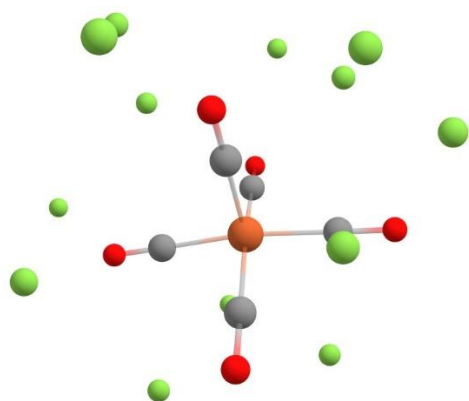

Table S24: Atom coordinates of  $[\text{Fe}(\text{CO})_5]^{*+}$  in presence of  $-0.3e$  point charges (coordinates obtained from scXRD).

| §coord            |                   |                   |    |
|-------------------|-------------------|-------------------|----|
| 17.14833672545167 | 23.92798997975182 | 7.14345954836085  | fe |
| 19.09245672684867 | 22.03174052054385 | 9.41275417265283  | c  |
| 18.68737692450002 | 22.20349016910658 | 4.48452040470616  | c  |
| 20.25673022031348 | 20.87719722689473 | 10.75616047464929 | o  |
| 15.92692358315655 | 26.29369087201771 | 4.80504252188231  | c  |
| 19.59679628361942 | 21.14436481666820 | 2.86908991679595  | o  |
| 16.12007438008068 | 26.08377442491591 | 9.76505014488844  | c  |
| 14.25294749017931 | 21.77729645676748 | 7.27780017856050  | c  |
| 15.25357826015603 | 27.74084691770837 | 3.39474558425248  | o  |
| 12.58701785104072 | 20.49171388445844 | 7.37311985401275  | o  |
| 15.49501722874271 | 27.42279089312486 | 11.29742339016910 | o  |
| 13.36767127202812 | 22.36283754511340 | 1.32110753372588  | f  |
| 19.34194403900014 | 21.27158684855638 | -2.39806245215010 | f  |
| 10.61794968534641 | 19.55662826511438 | 2.38189584515393  | f  |
| 10.48757181083011 | 26.04560762637684 | 8.14070014966999  | f  |
| 9.78364316022863  | 27.51184612647397 | 3.15783817891264  | f  |
| 21.46124165214995 | 27.44823416566682 | 10.19148385244537 | f  |
| 21.91729303725813 | 27.16770999164450 | 4.44717185757906  | f  |
| 24.12243523907132 | 22.07626813721840 | 6.31010166575764  | f  |
| 19.19708141373858 | 16.15056700082764 | 5.25600298481076  | f  |
| 11.19472055474794 | 15.45529707532920 | 8.27727065669669  | f  |
| 15.07840064840322 | 20.92585956432997 | 13.21442393195160 | f  |
| 9.84266119682682  | 20.97897598624095 | 12.13245368039261 | f  |
| 11.44152445580244 | 24.41620639322727 | 13.61187113048289 | f  |

Table S25: Vibrational spectrum of  $[\text{Fe}(\text{CO})_5]^{*+}$  in presence of  $-0.3e$  point charges (coordinates obtained from scXRD).

\$vibrational spectrum

| #  | mode | symmetry | wave number<br>cm** (-1) | IR intensity<br>km/mol | selection rules |       |
|----|------|----------|--------------------------|------------------------|-----------------|-------|
| #  |      |          |                          |                        | IR              | RAMAN |
| 1  |      |          | -0.00                    | 0.00000                | -               | -     |
| 2  |      |          | -0.00                    | 0.00000                | -               | -     |
| 3  |      |          | 0.00                     | 0.00000                | -               | -     |
| 4  |      |          | 0.00                     | 0.00000                | -               | -     |
| 5  |      |          | 0.00                     | 0.00000                | -               | -     |
| 6  |      |          | 0.00                     | 0.00000                | -               | -     |
| 7  |      | a        | 37.91                    | 0.17338                | YES             | YES   |
| 8  |      | a        | 80.73                    | 0.39488                | YES             | YES   |
| 9  |      | a        | 83.54                    | 0.42936                | YES             | YES   |
| 10 |      | a        | 98.04                    | 0.19804                | YES             | YES   |
| 11 |      | a        | 104.02                   | 0.77028                | YES             | YES   |
| 12 |      | a        | 105.95                   | 0.28101                | YES             | YES   |
| 13 |      | a        | 110.72                   | 2.24313                | YES             | YES   |
| 14 |      | a        | 330.75                   | 0.01999                | YES             | YES   |
| 15 |      | a        | 334.93                   | 0.03587                | YES             | YES   |
| 16 |      | a        | 362.03                   | 0.02235                | YES             | YES   |
| 17 |      | a        | 375.22                   | 0.87776                | YES             | YES   |
| 18 |      | a        | 380.93                   | 0.74871                | YES             | YES   |
| 19 |      | a        | 423.35                   | 6.22450                | YES             | YES   |
| 20 |      | a        | 429.47                   | 4.39964                | YES             | YES   |
| 21 |      | a        | 433.79                   | 3.55038                | YES             | YES   |
| 22 |      | a        | 445.64                   | 0.21677                | YES             | YES   |
| 23 |      | a        | 482.25                   | 6.93588                | YES             | YES   |
| 24 |      | a        | 486.54                   | 6.36382                | YES             | YES   |
| 25 |      | a        | 539.03                   | 0.78560                | YES             | YES   |
| 26 |      | a        | 614.57                   | 77.92819               | YES             | YES   |
| 27 |      | a        | 619.96                   | 93.08094               | YES             | YES   |
| 28 |      | a        | 623.93                   | 89.94672               | YES             | YES   |
| 29 |      | a        | 2062.92                  | 1140.46706             | YES             | YES   |
| 30 |      | a        | 2075.77                  | 862.53320              | YES             | YES   |
| 31 |      | a        | 2099.42                  | 248.31165              | YES             | YES   |
| 32 |      | a        | 2141.97                  | 295.82794              | YES             | YES   |
| 33 |      | a        | 2179.14                  | 71.14947               | YES             | YES   |

## References

- [1] D. B. G. Williams, M. Lawton, *J. Org. Chem.* **2010**, *75*, 8351–8354.
- [2] T. A. Engesser, C. Friedmann, A. Martens, D. Kratzert, P. J. Malinowski, I. Krossing, *Chem. Eur. J.* **2016**, *22*, 15085–15094.
- [3] I. Krossing, *Chem. Eur. J.* **2001**, *7*, 490–502.
- [4] A. Martens, P. Weis, M. C. Krummer, M. Kreuzer, A. Meierhöfer, S. C. Meier, J. Bohnenberger, H. Scherer, I. Riddlestone, I. Krossing, *Chem. Sci.* **2018**, *9*, 7058–7068.
- [5] M. Schorpp, T. Heizmann, M. Schmucker, S. Rein, S. Weber, I. Krossing, *Angew. Chem. Int. Ed.* **2020**, *59*, 9453–9459.
- [6] B. J. Cosier, A. M. Glazer, *J. Appl. Crystallogr.* **1986**, *19*, 105–107.
- [7] R. Shelxl, *User Guid. to Cryst. Struct. refinement with SHELXL* **2008**.
- [8] D. Kratzert, J. J. Holstein, I. Krossing, *J. Appl. Crystallogr.* **2015**, *48*, 933–938.
- [9] B. H. Toby, R. B. Dreele, *J. Appl. Cryst.* **2013**, *46*, 544–549.
- [10] K. Herb, R. Tschaggelar, G. Denninger, G. Jeschke, *J. Magn. Reson.* **2018**, *289*, 100–106.
- [11] S. Stoll, A. Schweiger, *J. Magn. Reson.* **2006**, *178*, 42–55.
- [12] G. R. Fulmer, A. J. M. Miller, N. H. Sherden, H. E. Gottlieb, A. Nudelman, B. M. Stoltz, J. E. Bercaw, K. I. Goldberg, *Organometallics* **2010**, *29*, 2176–2179.
- [13] G. A. Bain, J. F. Berry, *J. Chem. Educ.* **2008**, *85*, 532–536.
- [14] O. Treutler, R. Ahlrichs, *J. Chem. Phys.* **1995**, *102*, 346–354.
- [15] M. Von Arnim, R. Ahlrichs, *J. Comput. Chem.* **1998**, *19*, 1746–1757.
- [16] J. P. Perdew, *Phys. Rev. B* **1986**, *33*, 8822–8824.
- [17] J. P. Perdew, *Phys. Rev. B* **1986**, *34*, 7406.
- [18] A. D. Becke, *J. Chem. Phys.* **1993**, *98*, 1372–1377.
- [19] A. D. Becke, *J. Chem. Phys.* **1993**, *98*, 5648–5652.
- [20] C. Lee, W. Yang, R. G. Parr, *Phys. Rev. B* **1988**, *37*, 785–789.
- [21] F. Weigend, R. Ahlrichs, *Phys. Chem. Chem. Phys.* **2005**, *7*, 3297–3305.
- [22] S. Grimme, J. Antony, S. Ehrlich, H. Krieg, *J. Chem. Phys.* **2010**, *132*, 156104.
- [23] S. Grimme, S. Ehrlich, L. Goerick, *J. Comput. Chem.* **2011**, *32*, 1456–1465.
- [24] P. Deglmann, F. Furche, R. Ahlrichs, *Chem. Phys. Lett.* **2002**, *362*, 511–518.
- [25] N. Rega, M. Cossi, V. Barone, *J. Chem. Phys.* **1996**, *105*, 11060–11067.
- [26] N. Rega, M. Cossi, V. Barone, *J. Am. Chem. Soc.* **1997**, *119*, 12962–12967.

- [27] N. Rega, M. Cossi, V. Barone, *J. Am. Chem. Soc.* **1998**, *120*, 5723–5732.
- [28] F. Neese, *WIREs Comput. Mol. Sci.* **2012**, *2*, 73–78.
- [29] F. Neese, *WIREs Comput. Mol. Sci.* **2018**, *8*, 1–6.
- [30] S. K. Sur, *J. Magn. Reson.* **1989**, *82*, 169–173.
- [31] D. F. Evans, *J. Chem. Soc.* **1959**, 2003–2005.
- [32] C. Piguet, *J. Chem. Educ.* **1997**, *74*, 815–816.
- [33] D. H. Grant, *J. Chem. Educ.* **1995**, *72*, 39–40.
- [34] S. C. Meier, D. Himmel, I. Krossing, *Chem. Eur. J.* **2018**, *24*, 19348–19360.
